# Supplementary material for: p-TSA·H2O catalyzed metal-free and environmentally benign synthesis of 4-aryl quinolines from arylamine, arylacetylene, and dimethyl sulfoxide
Source: Royal Society of Chemistry journal article supplement (doi:10.1039/d3ob00993a), 2023-01-01

*Electronic Supporting Information*

**Title: *p*-TSA·H<sub>2</sub>O catalyzed metal-free and environmentally benign synthesis of 4-aryl quinolines from Arylamine, Arylacetylene, and Dimethyl sulfoxide**

**Simra Faraz,<sup>a</sup> and Abu Taleb Khan<sup>a\*</sup>**

<sup>a</sup>*Department of Chemistry, Indian Institute of Guwahati, Guwahati 781039, Assam, India.*

**Table of content**

|                                                                                         |      |
|-----------------------------------------------------------------------------------------|------|
| Title of the Manuscript                                                                 | 1    |
| Copies of <sup>1</sup> H NMR, <sup>13</sup> C NMR and HRMS spectra of all the compounds | 2-72 |

### <sup>1</sup>H NMR Spectrum of 6-Methoxy-4-phenylquinoline(3a)

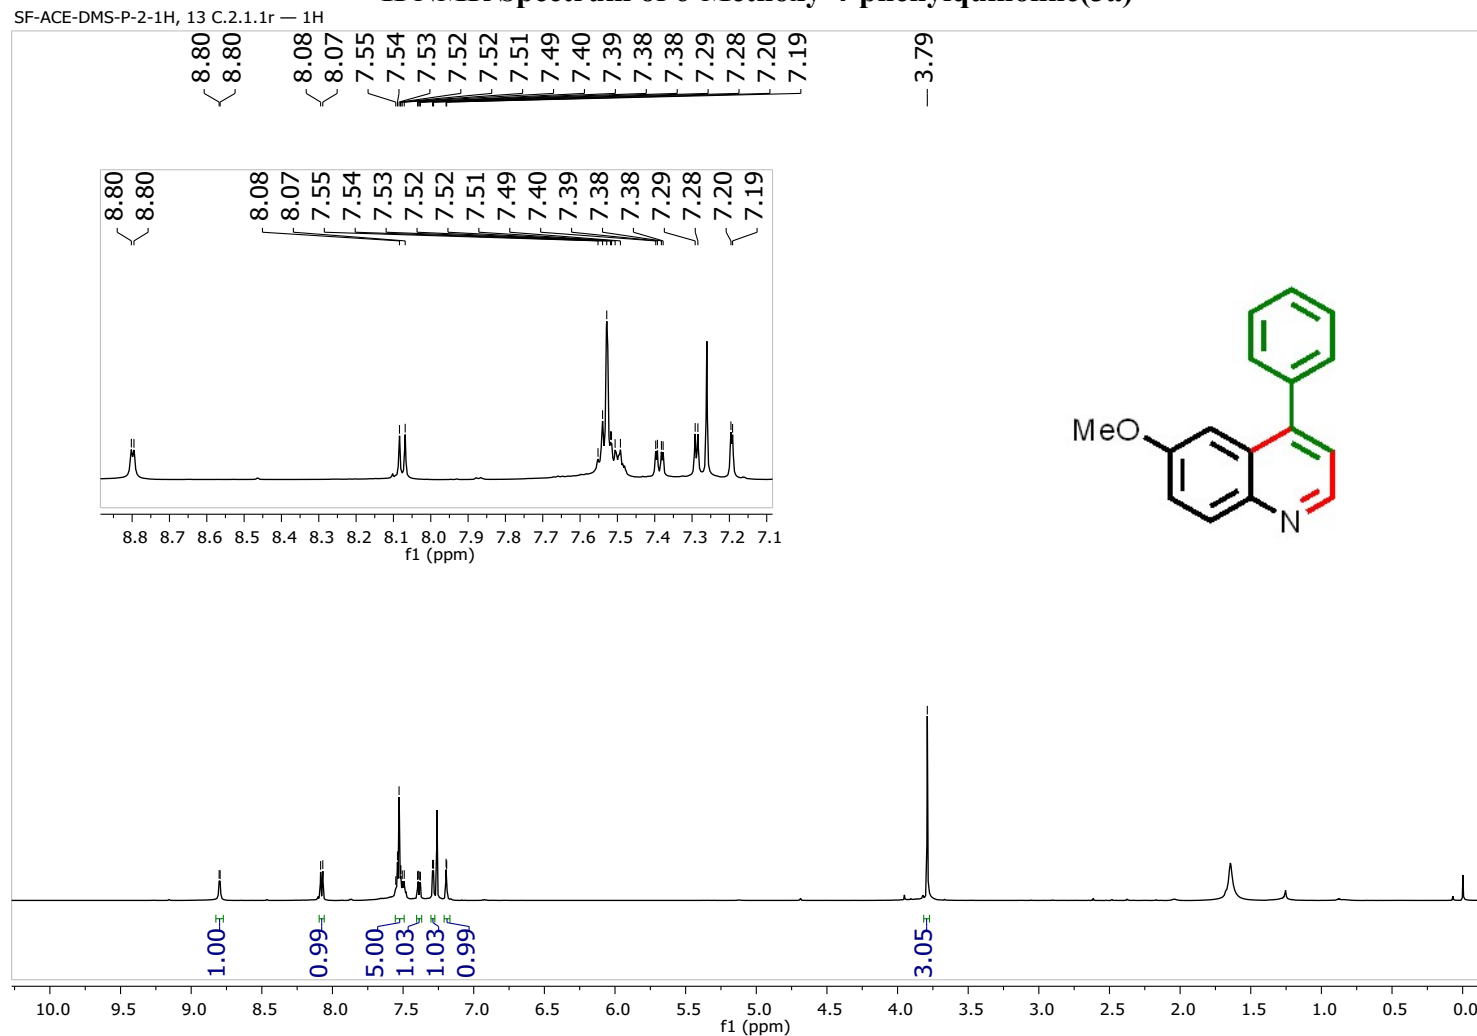

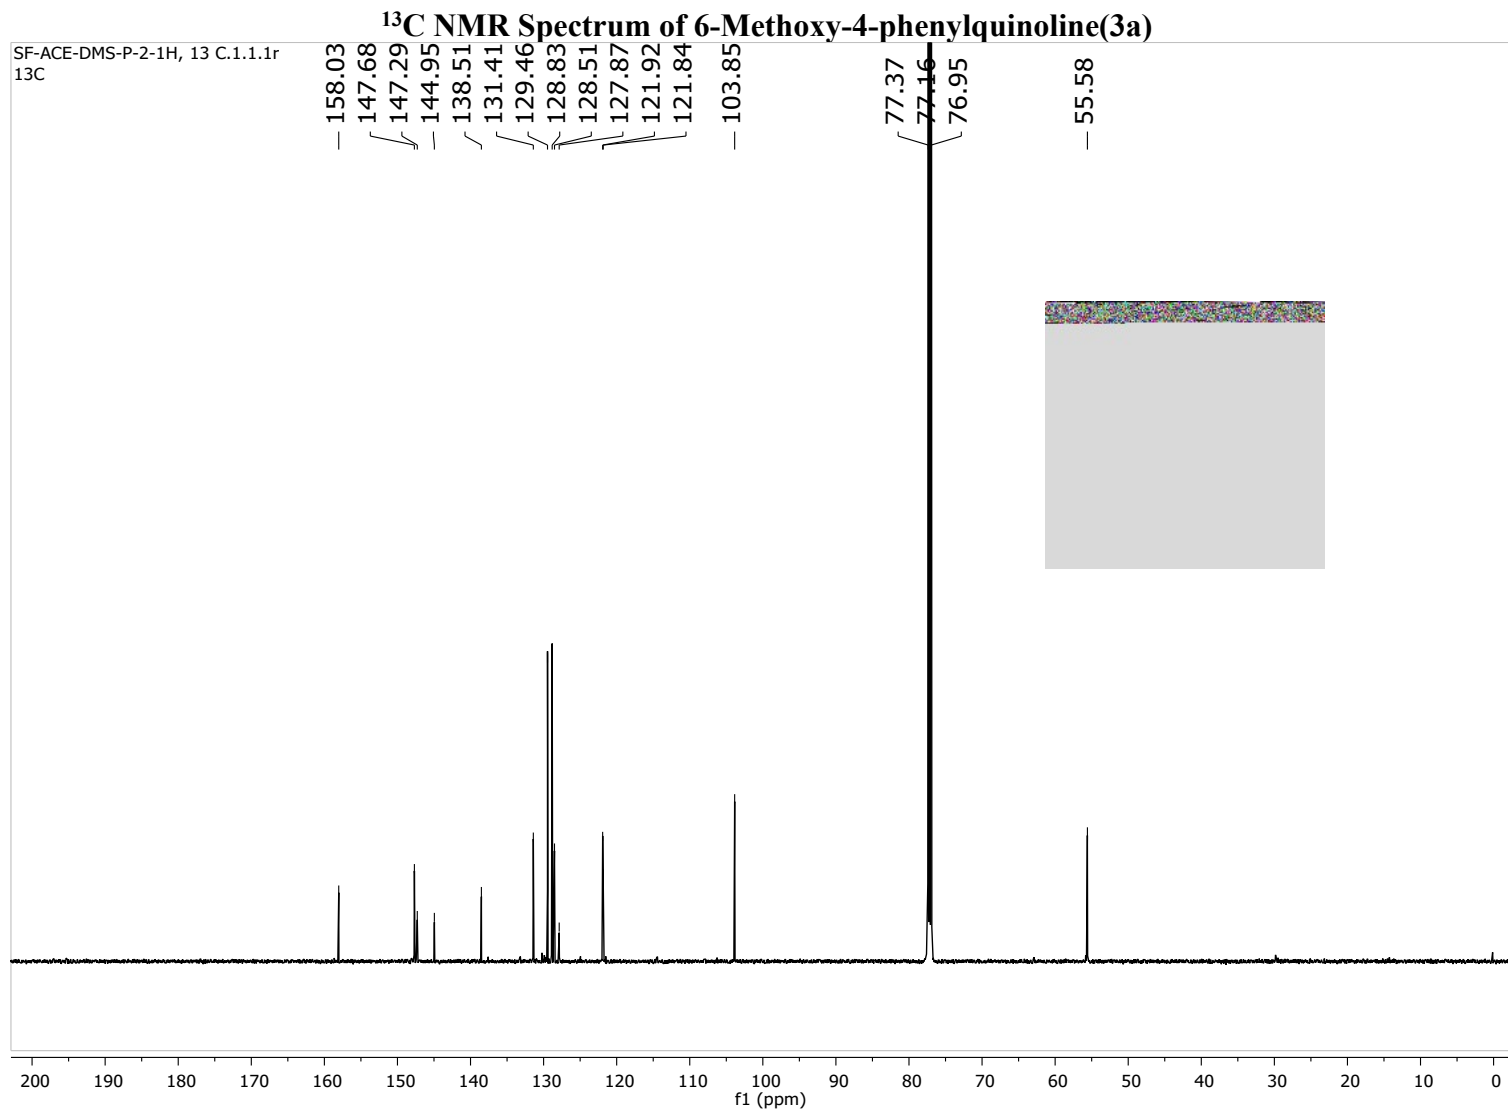

## HRMS Spectrum of 6-Methoxy-4-phenylquinoline(3a)

|                    |                           |                               |         |                        |                                 |
|--------------------|---------------------------|-------------------------------|---------|------------------------|---------------------------------|
| <b>Sample Name</b> | Sample2                   | <b>Position</b>               | P1-A2   | <b>Instrument Name</b> | QTOF                            |
| <b>User Name</b>   | SYSTEM (SYSTEM)           | <b>Inj Vol</b>                | 5       | <b>InjPosition</b>     |                                 |
| <b>Sample Type</b> | Sample                    | <b>IRM Calibration Status</b> | Success | <b>Data Filename</b>   | SF2404.d                        |
| <b>ACQ Method</b>  | DIRECT MASS_POSITIVE_01.m | <b>Comment</b>                |         | <b>Acquired Time</b>   | 17-04-2023 11:49:14 (UTC+05:30) |

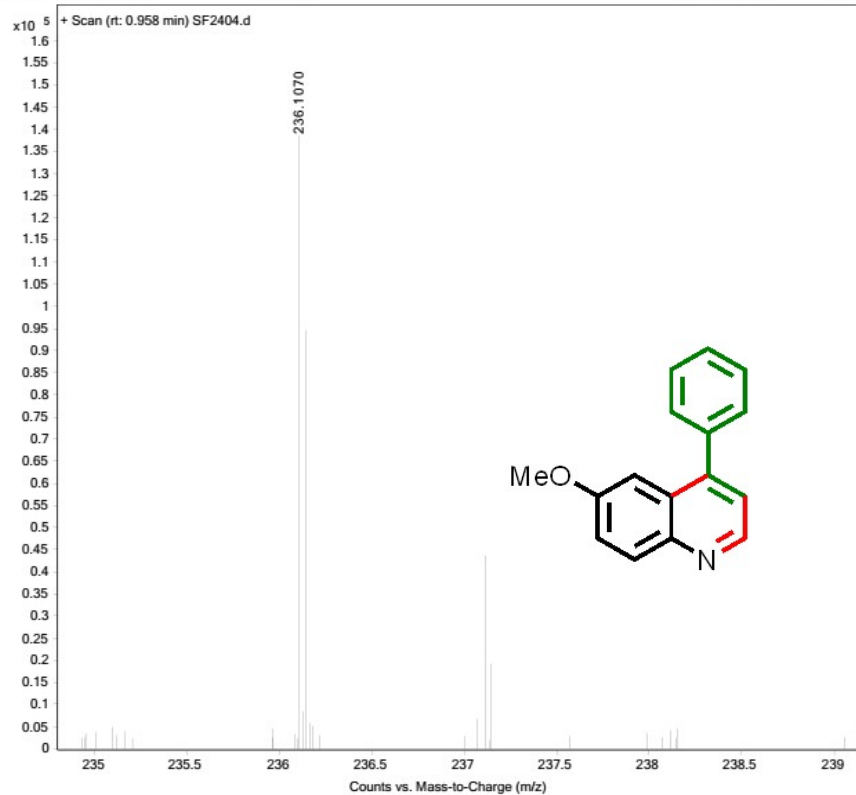

# <sup>1</sup>H NMR Spectrum of 6-Methoxy-4-(*m*-tolyl)quinoline (3b)

SFPA-3-CH-E-1H.3.fid — 1H

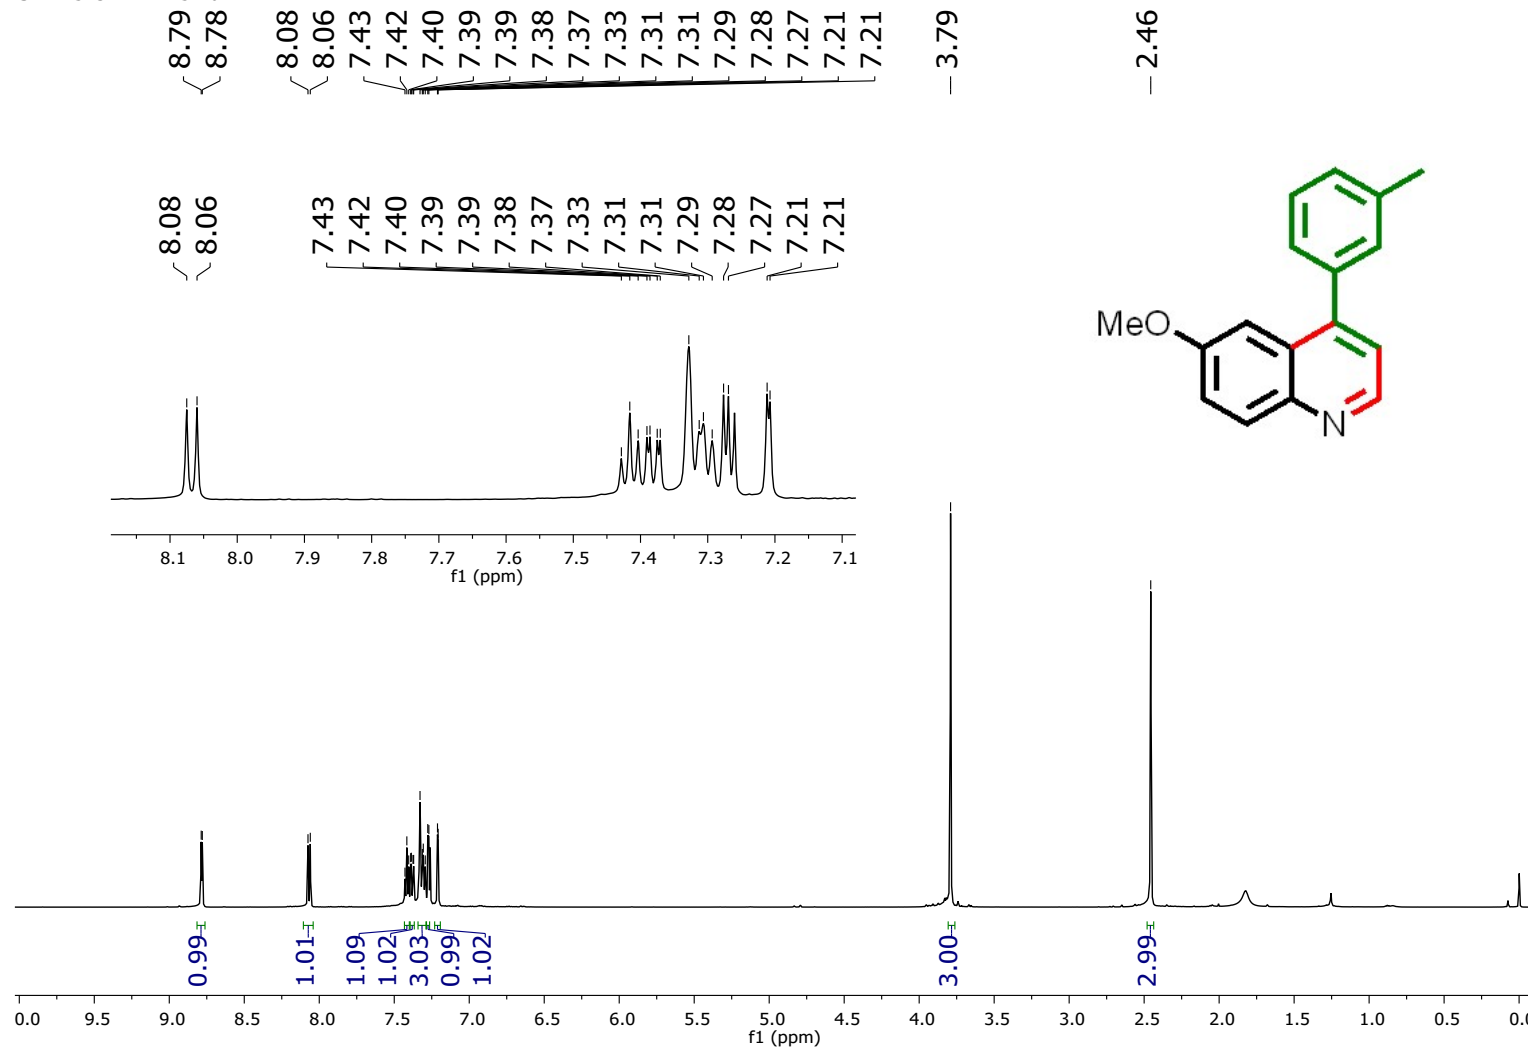

<sup>13</sup>C NMR Spectrum of 6-Methoxy-4-(*m*-tolyl)quinoline (3b)

SFPA-3-CH-E-13C.2.fid — 13C

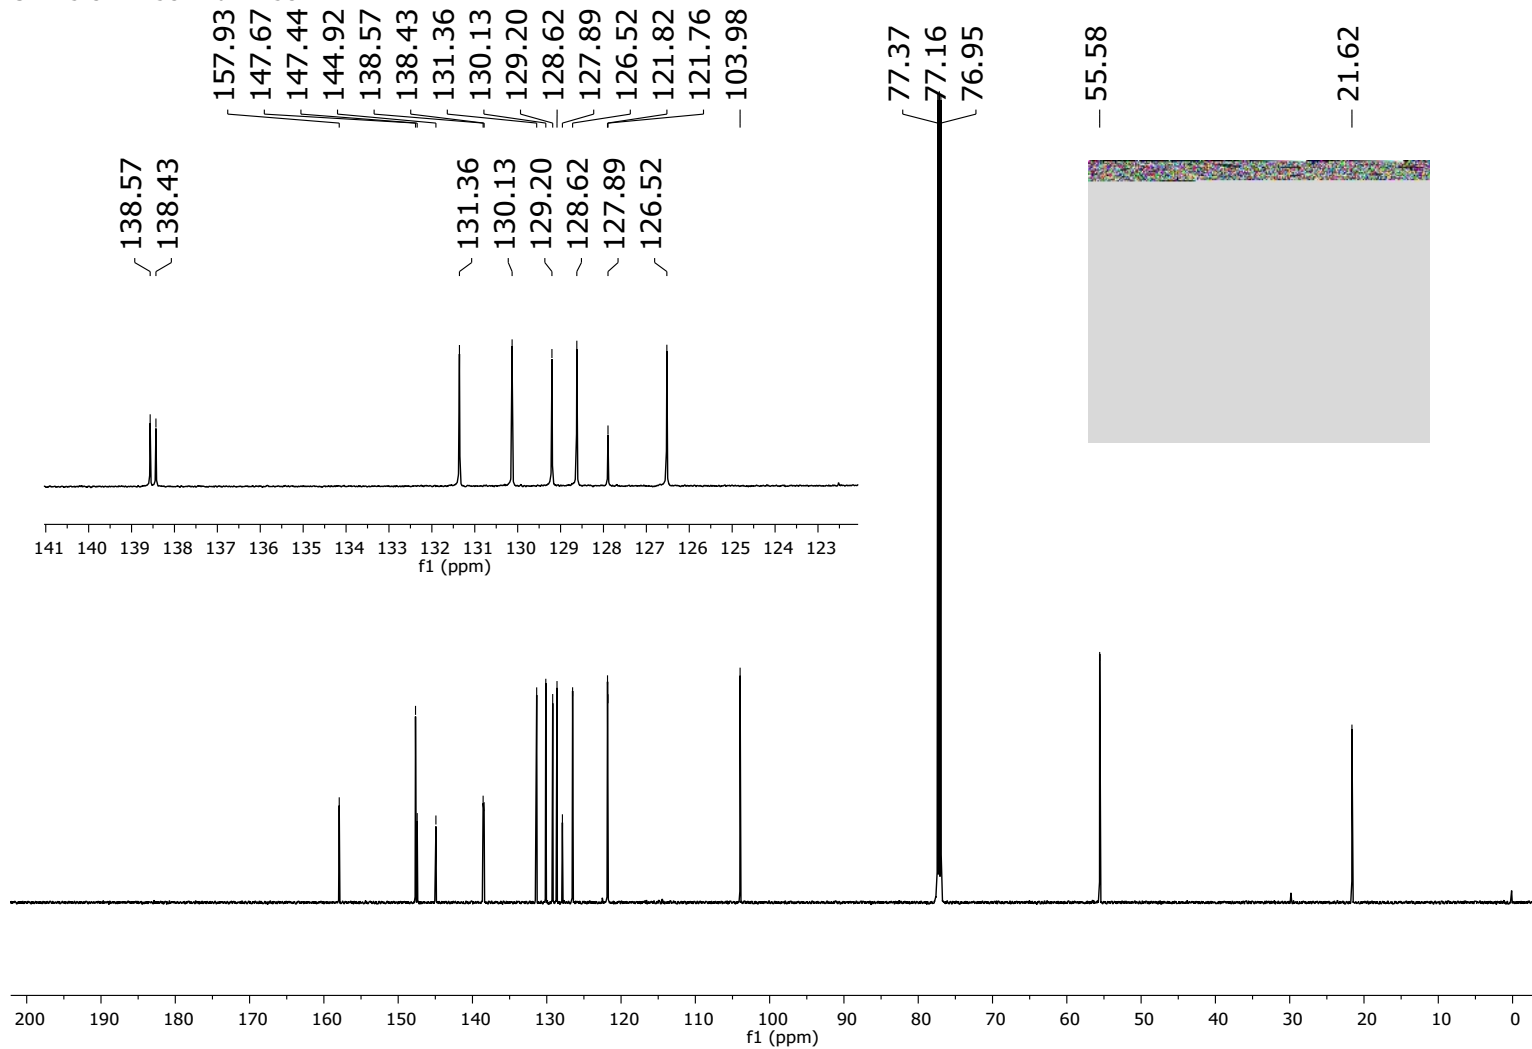

## HRMS Spectrum of 6-Methoxy-4-(*m-tolyl*)quinoline (3b)

|             |                             |                        |         |                 |                                 |
|-------------|-----------------------------|------------------------|---------|-----------------|---------------------------------|
| Sample Name | Sample71                    | Position               | P1-D3   | Instrument Name | QTOF                            |
| User Name   | SYSTEM (SYSTEM)             | Inj Vol                | 5       | InjPosition     |                                 |
| Sample Type | Sample                      | IRM Calibration Status | Success | Data Filename   | ATK-RK-1.d                      |
| ACQ Method  | LC-COLUMN-TRAINING-METHOD.m | Comment                |         | Acquired Time   | 11-04-2023 01:26:48 (UTC+05:30) |

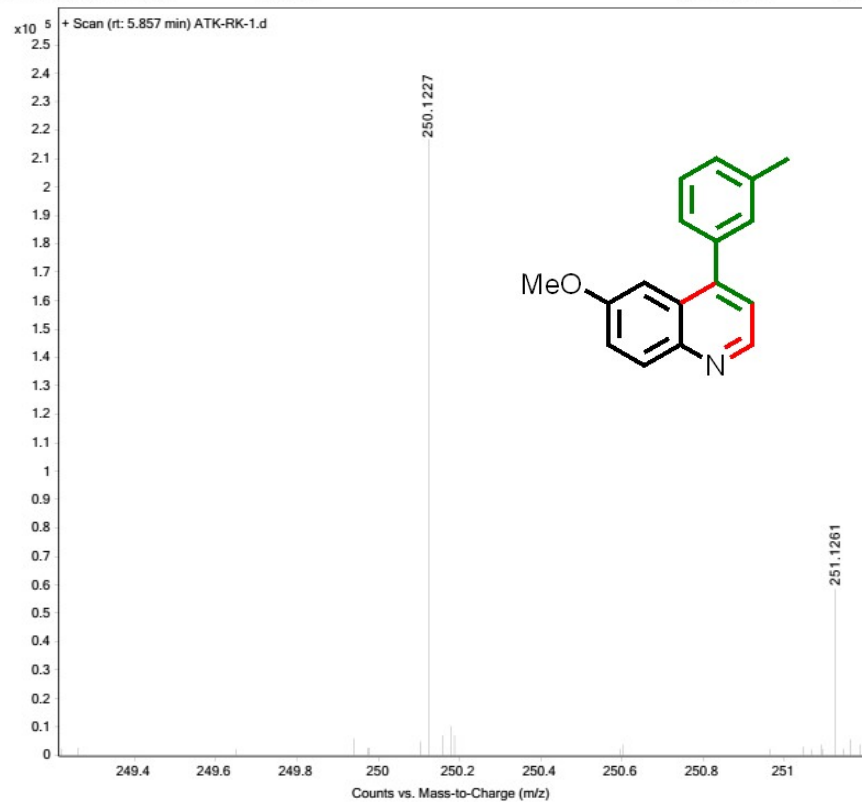

# <sup>1</sup>H NMR Spectrum of 6-Methoxy-4-(*p*-tolyl)quinoline(3c)

SF-PA-PE-DMSO-1H.1.fid - 1H

8.79  
8.78  
8.08  
8.07  
7.43  
7.41  
7.39  
7.38  
7.37  
7.37  
7.35  
7.33  
7.28  
7.27  
7.23  
7.23

3.79

2.47

7.43  
7.41  
7.39  
7.38  
7.37  
7.37  
7.35  
7.33  
7.28  
7.27  
7.23  
7.23

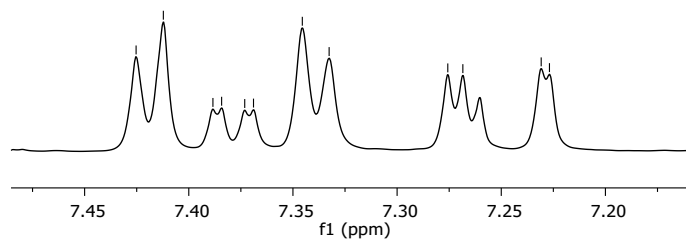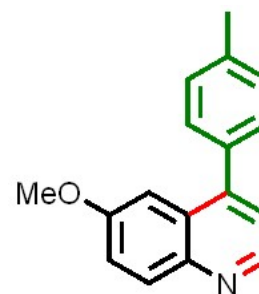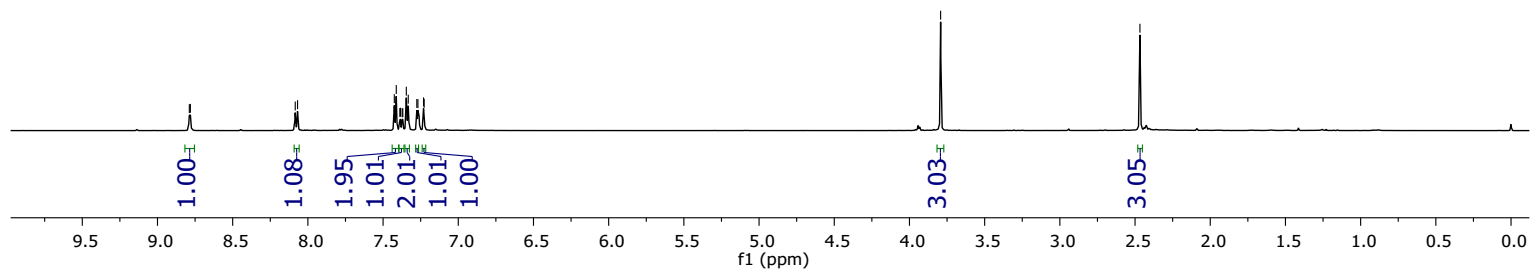



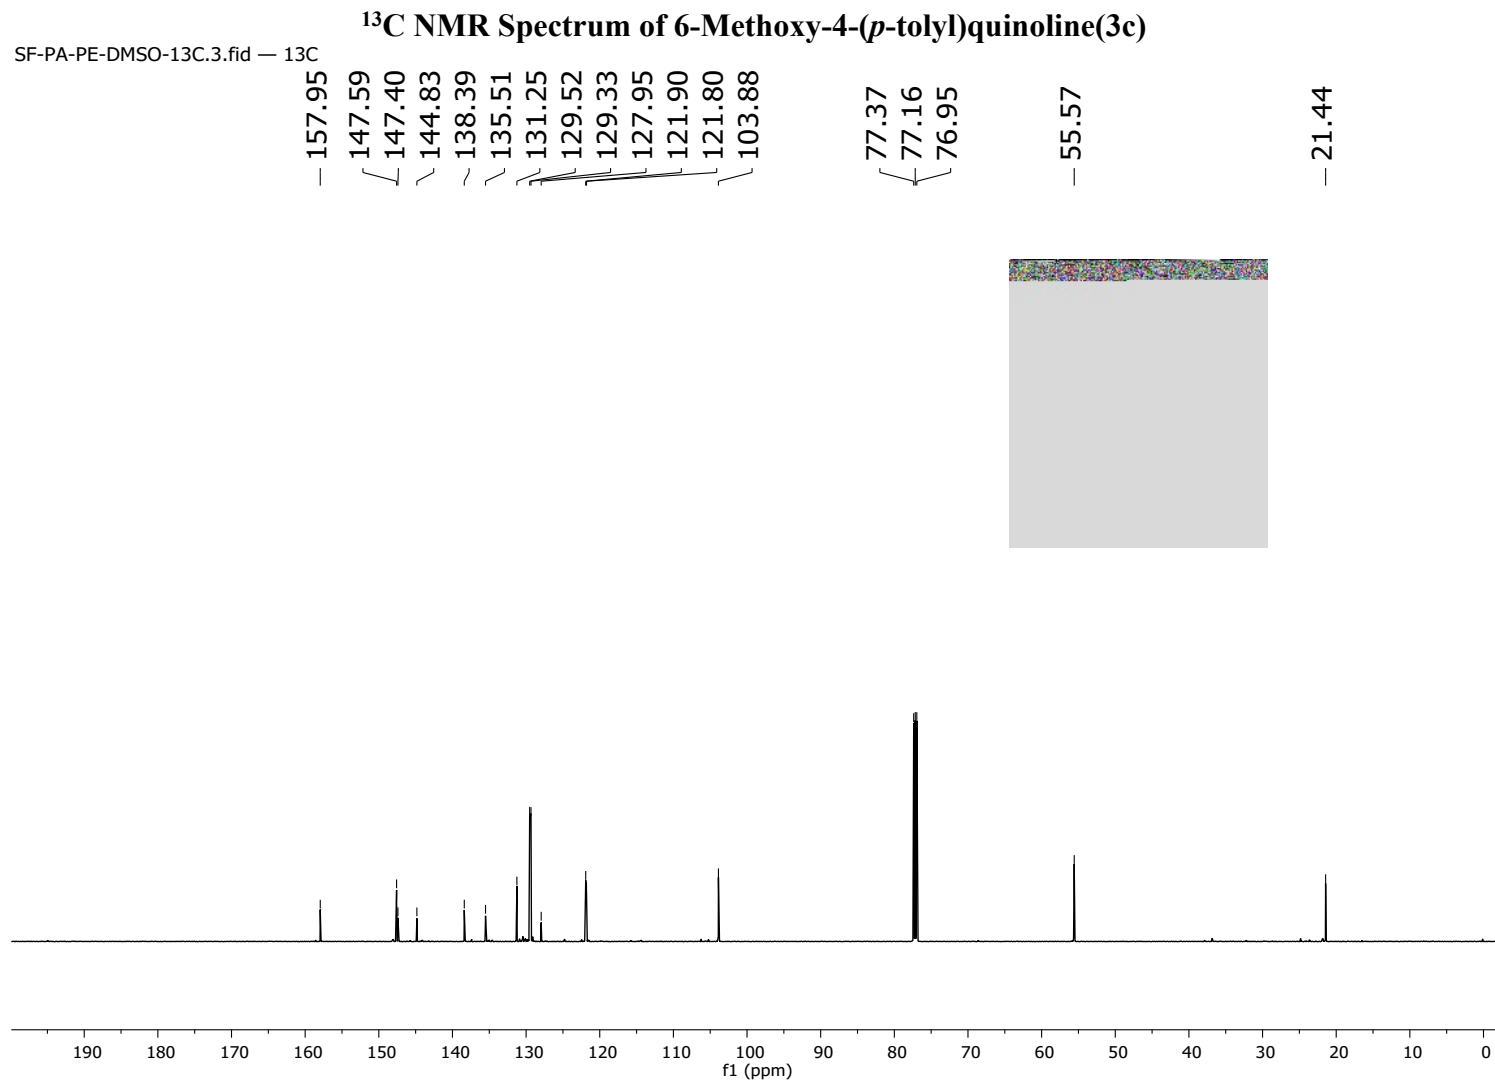

## HRMS Spectrum of 6-Methoxy-4-(*p*-tolyl)quinoline(3c)

|                    |                             |                               |         |                        |                                 |
|--------------------|-----------------------------|-------------------------------|---------|------------------------|---------------------------------|
| <b>Sample Name</b> | Sample73                    | <b>Position</b>               | P1-D4   | <b>Instrument Name</b> | QTOF                            |
| <b>User Name</b>   | SYSTEM (SYSTEM)             | <b>Inj Vol</b>                | 5       | <b>InjPosition</b>     |                                 |
| <b>Sample Type</b> | Sample                      | <b>IRM Calibration Status</b> | Success | <b>Data Filename</b>   | ATK-RK-2.d                      |
| <b>ACQ Method</b>  | LC-COLUMN-TRAINING-METHOD.m | <b>Comment</b>                |         | <b>Acquired Time</b>   | 11-04-2023 01:40:54 (UTC+05:30) |

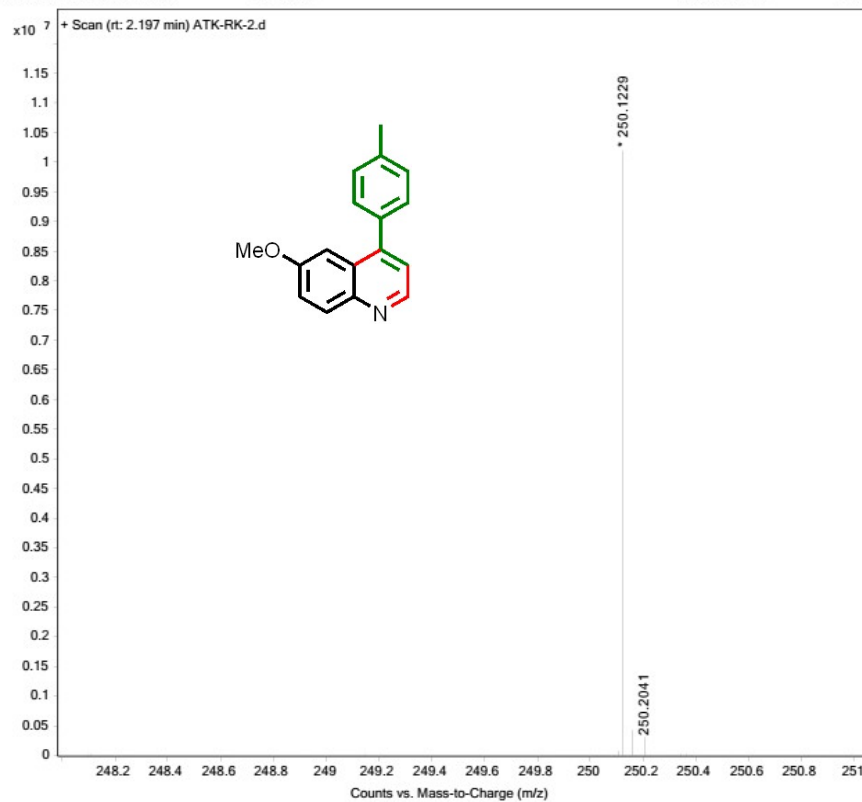

### <sup>1</sup>H NMR Spectrum of 4-(4-Ethylphenyl)-6-methoxyquinoline(3d)

SF-PA-4EE-T-1H.1.fid — SF-PA-4EE-T-1H

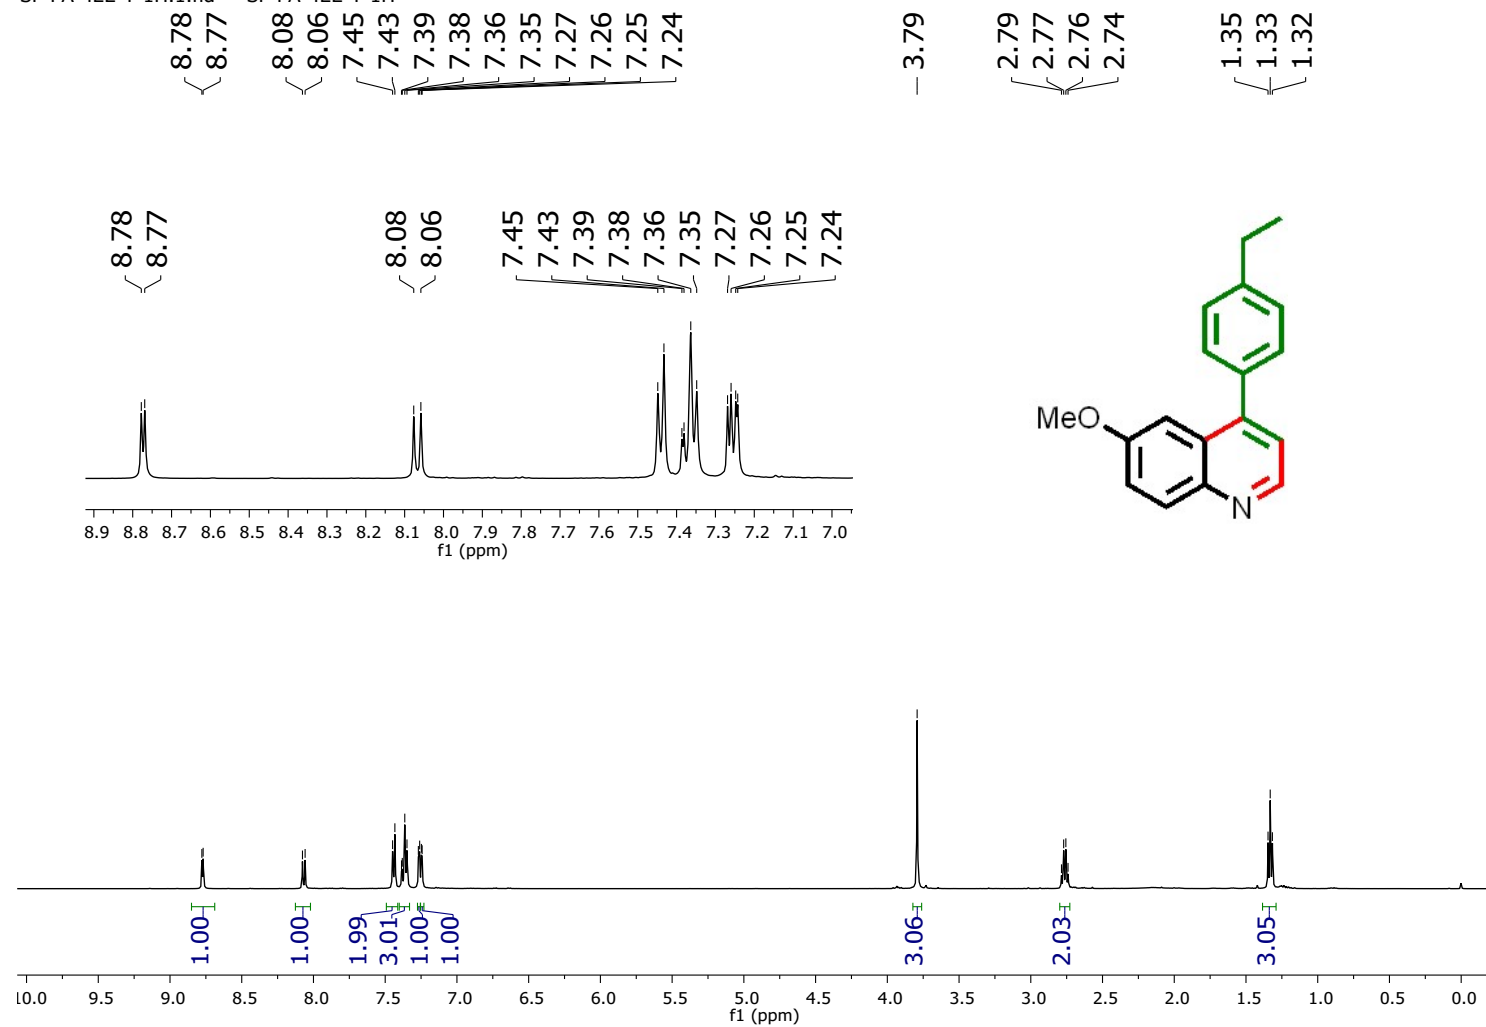

### <sup>13</sup>C NMR Spectrum of 4-(4-Ethylphenyl)-6-methoxyquinoline(3d)

SF-PA-4EE-T-13C.3.fid — SF-PA-4EE-T-13C

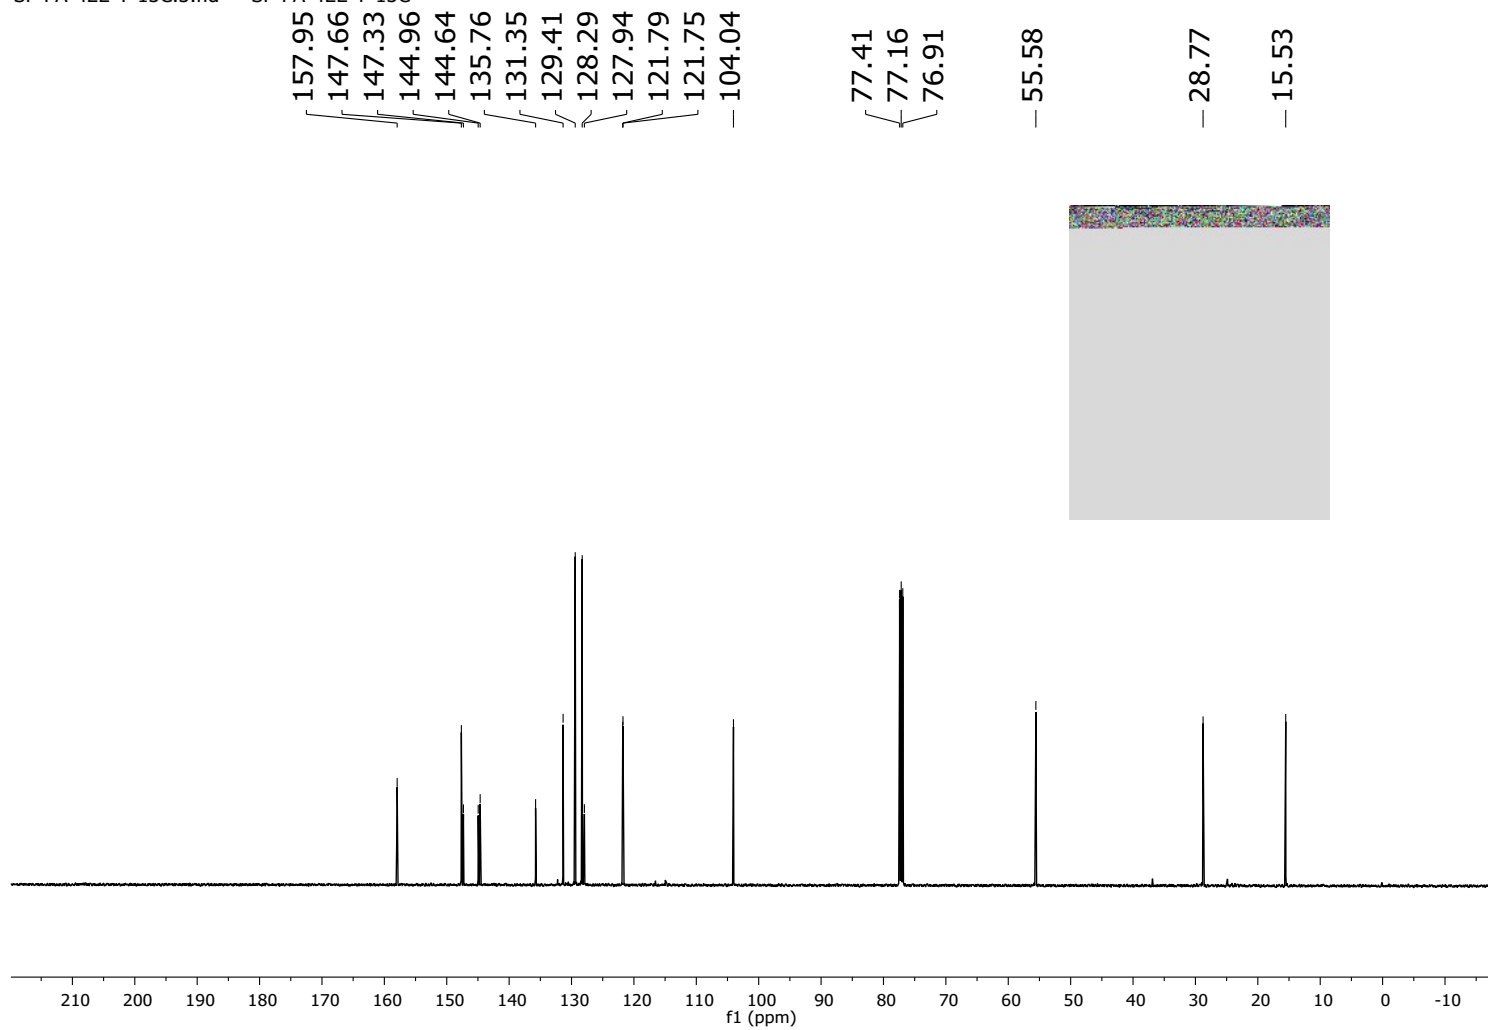

## HRMS Spectrum of 4-(4-Ethylphenyl)-6-methoxyquinoline(3d)

|                    |                           |                               |         |                        |                                 |
|--------------------|---------------------------|-------------------------------|---------|------------------------|---------------------------------|
| <b>Sample Name</b> | SampleS8                  | <b>Position</b>               | P1-B9   | <b>Instrument Name</b> | QTOF                            |
| <b>User Name</b>   | SYSTEM (SYSTEM)           | <b>Inj Vol</b>                | 5       | <b>InjPosition</b>     |                                 |
| <b>Sample Type</b> | Sample                    | <b>IRM Calibration Status</b> | Success | <b>Data Filename</b>   | ATK_RF5.d                       |
| <b>ACQ Method</b>  | DIRECT MASS_POSITIVE_01.m | <b>Comment</b>                |         | <b>Acquired Time</b>   | 17-04-2023 16:17:07 (UTC+05:30) |

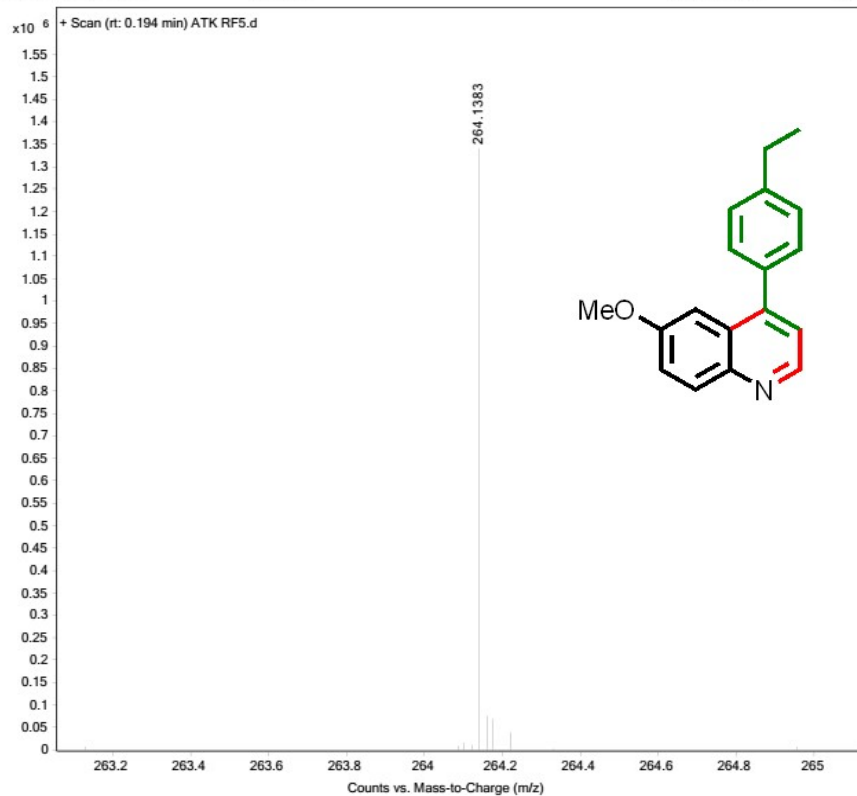

# <sup>1</sup>H NMR Spectrum of 4-(4-(*tert*-Butyl)phenyl)-6-methoxyquinoline (3e)

SF-PT-3DMS-1H.1.fid — 1H

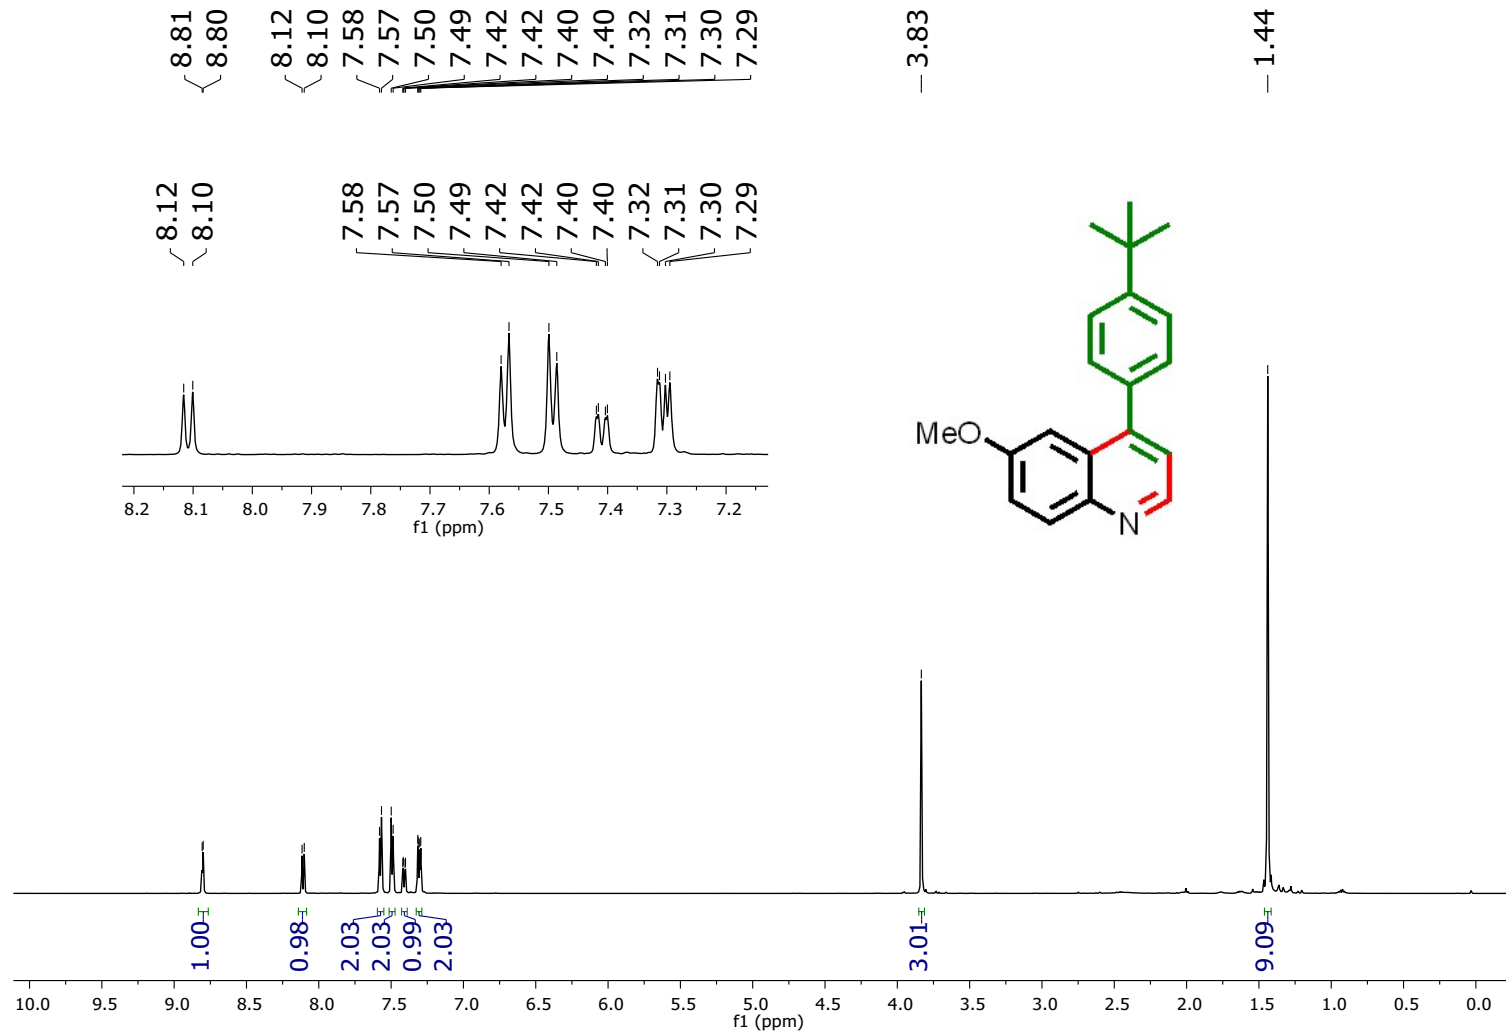

**<sup>13</sup>C NMR Spectrum of 4-(4-(*tert*-Butyl)phenyl)-6-methoxyquinoline(3e)**

SFPTE3DMS\_13C.12.fid — SFPTE3DMS\_13C

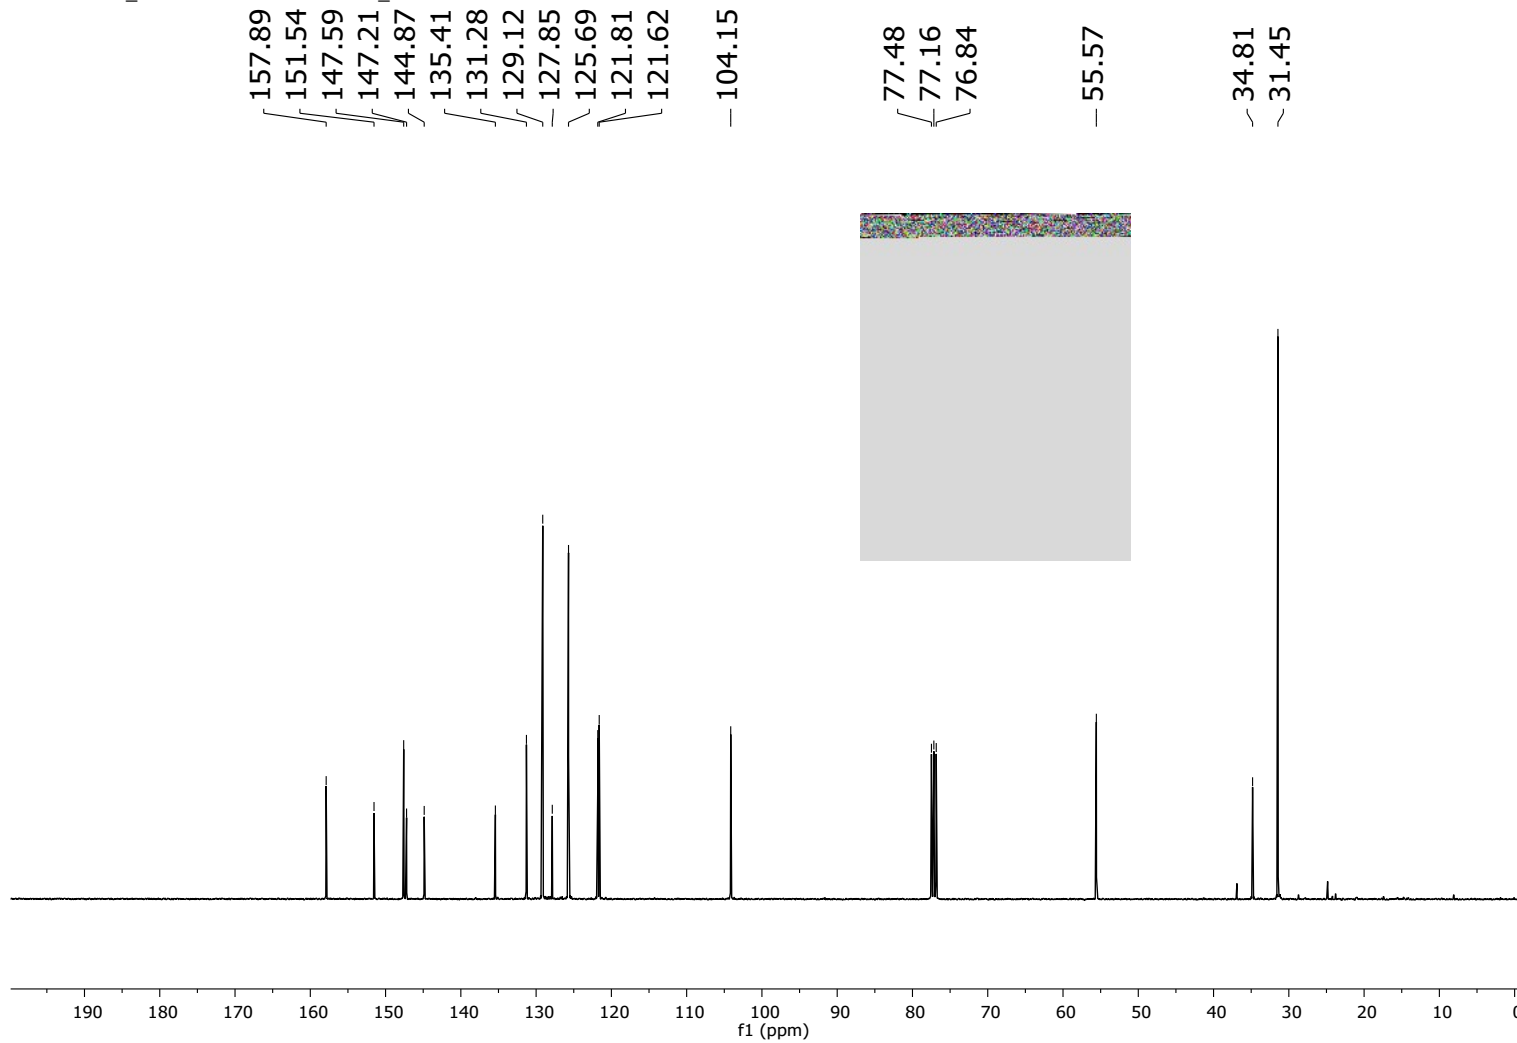

## HRMS Spectrum of 4-(4-(*tert*-Butyl)phenyl)-6-methoxyquinoline(3e)

|                    |                             |                               |         |                        |                                 |
|--------------------|-----------------------------|-------------------------------|---------|------------------------|---------------------------------|
| <b>Sample Name</b> | Sample75                    | <b>Position</b>               | P1-D5   | <b>Instrument Name</b> | QTOF                            |
| <b>User Name</b>   | SYSTEM (SYSTEM)             | <b>Inj Vol</b>                | 5       | <b>InjPosition</b>     |                                 |
| <b>Sample Type</b> | Sample                      | <b>IRM Calibration Status</b> | Success | <b>Data Filename</b>   | ATK-RK-3.d                      |
| <b>ACQ Method</b>  | LC-COLUMN-TRAINING-METHOD.m | <b>Comment</b>                |         | <b>Acquired Time</b>   | 11-04-2023 01:54:59 (UTC+05:30) |

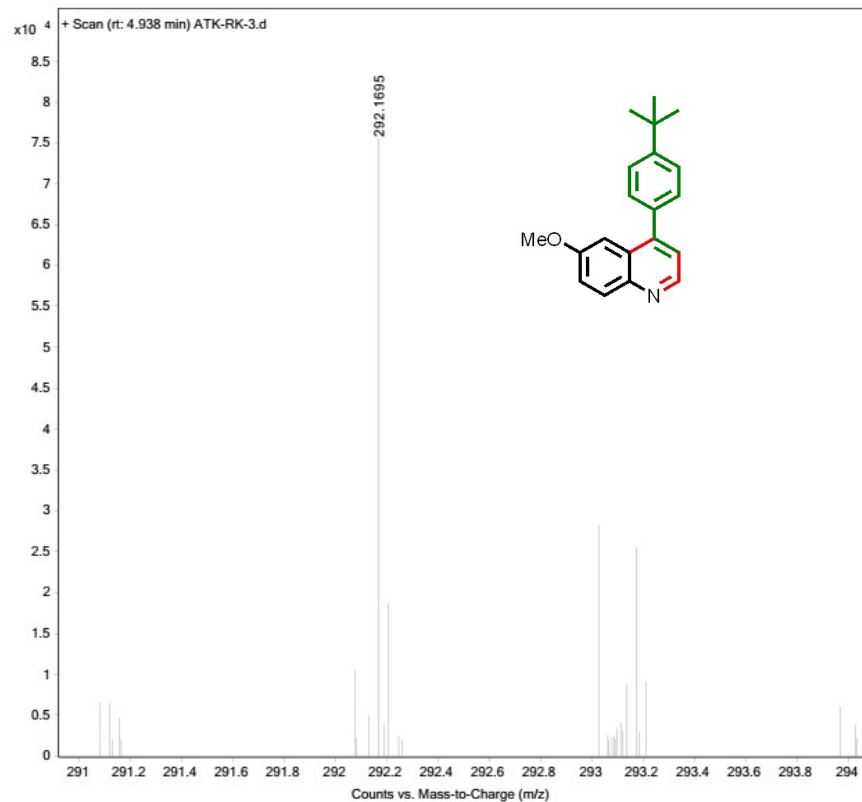



# <sup>1</sup>H NMR Spectrum of 6-Methoxy-4-(4-methoxyphenyl)quinoline(3f)

SF-PA-4FE-ST-1H.1.fid — SF-PA-4FE-ST-1H

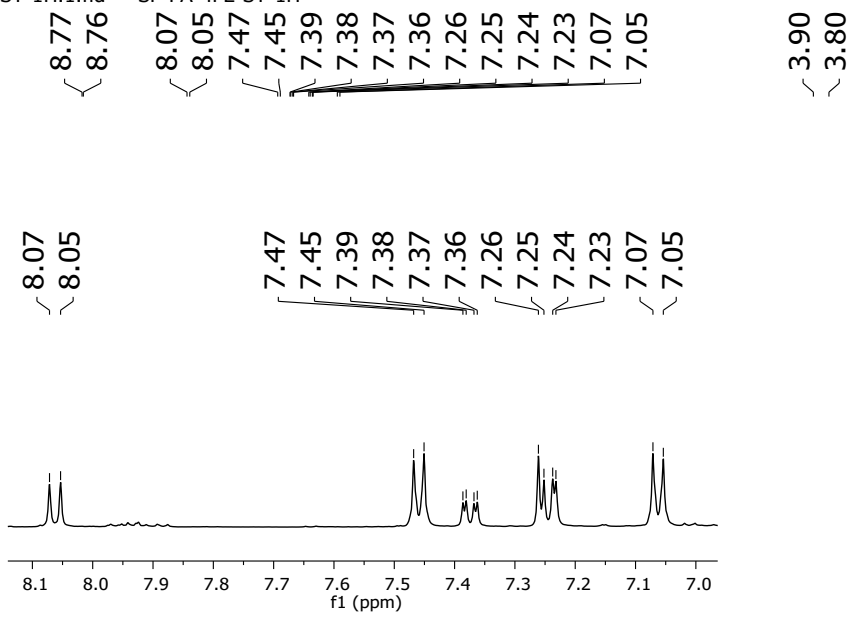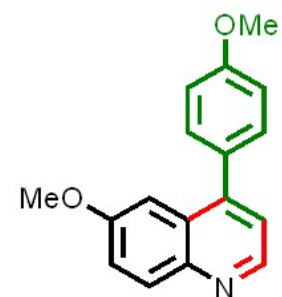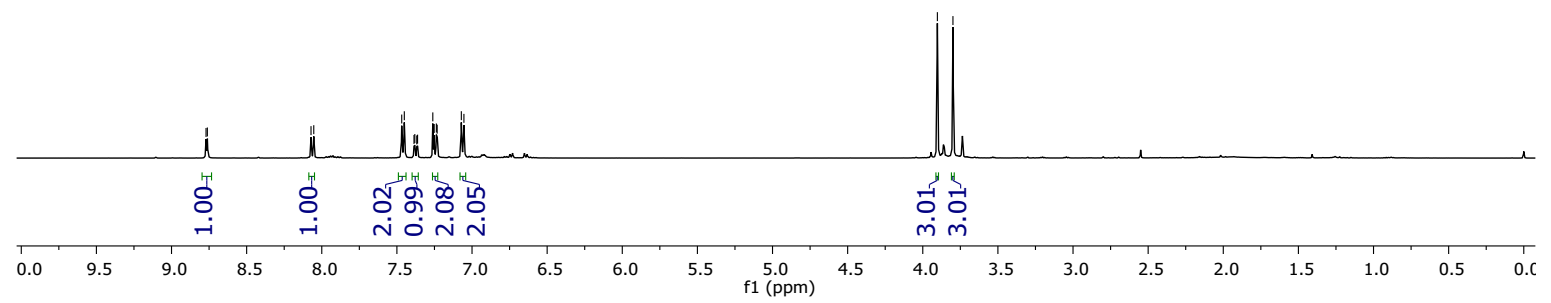

**<sup>13</sup>C NMR Spectrum of 6-Methoxy-4-(4-methoxyphenyl)quinoline(3f)**

SF-PA-4FE-ST-13C.3.fid — SF-PA-4FE-ST-13C

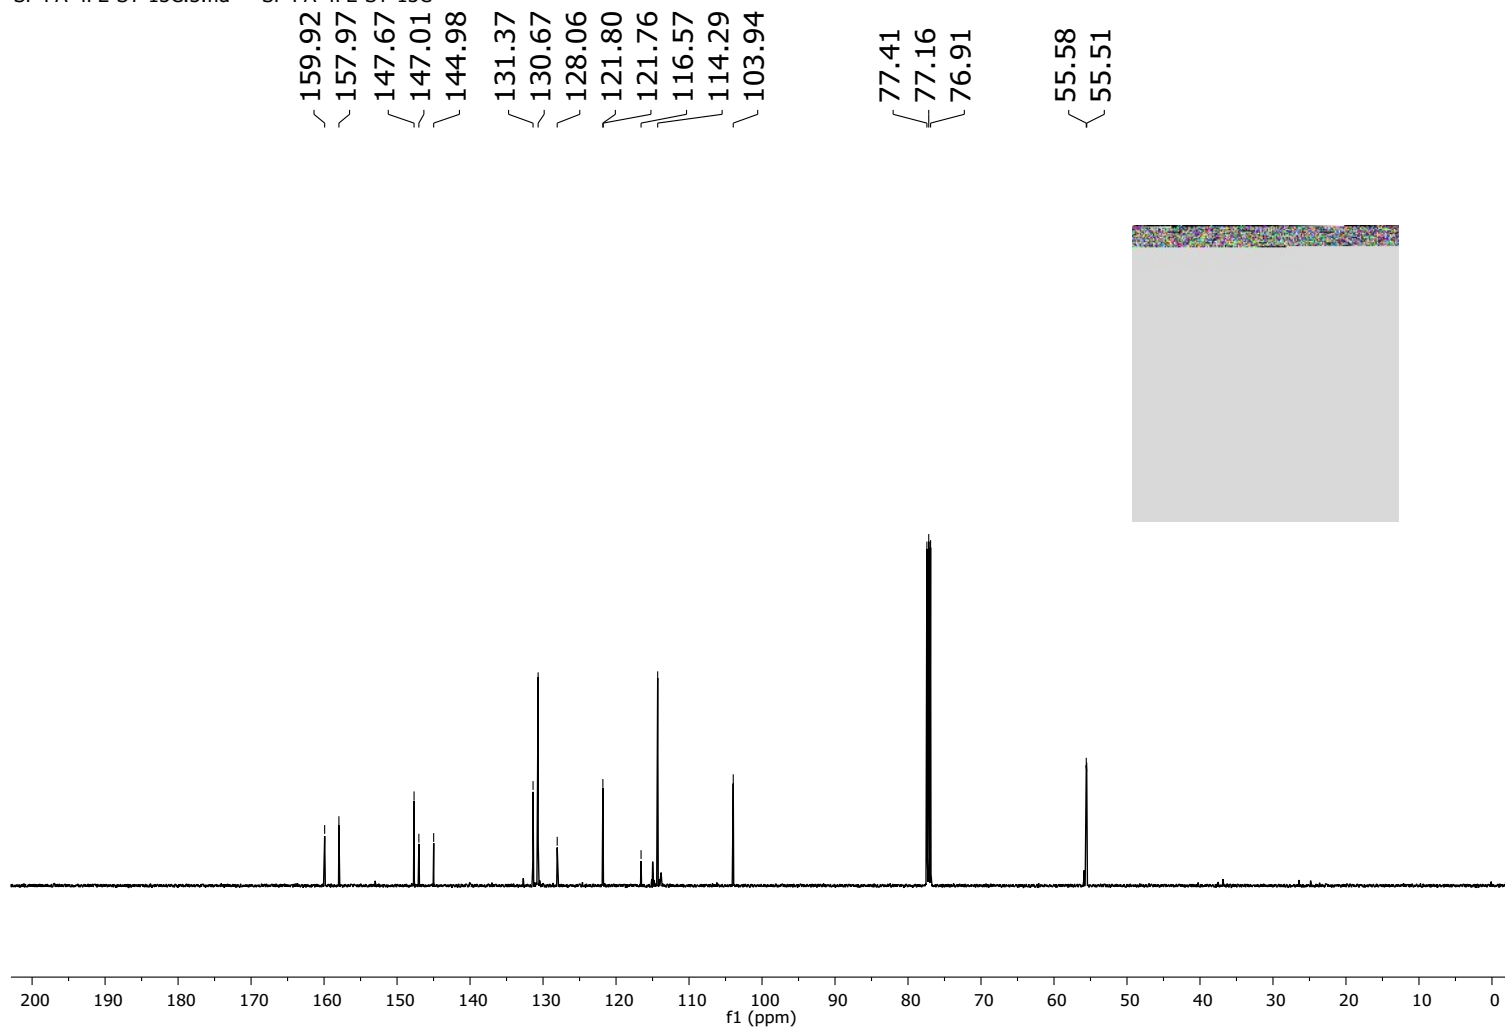

## HRMS Spectrum of 6-Methoxy-4-(4-methoxyphenyl)quinoline(3f)

|             |                             |                        |         |                 |                                 |
|-------------|-----------------------------|------------------------|---------|-----------------|---------------------------------|
| Sample Name | Sample59                    | Position               | P1-A11  | Instrument Name | QTOF                            |
| User Name   | SYSTEM (SYSTEM)             | Inj Vol                | 5       | InjPosition     |                                 |
| Sample Type | Sample                      | IRM Calibration Status | Success | Data Filename   | SF311.d                         |
| ACQ Method  | DIRECT MASS_POSITIVE_01_1.m | Comment                |         | Acquired Time   | 27-04-2023 15:28:13 (UTC+05:30) |

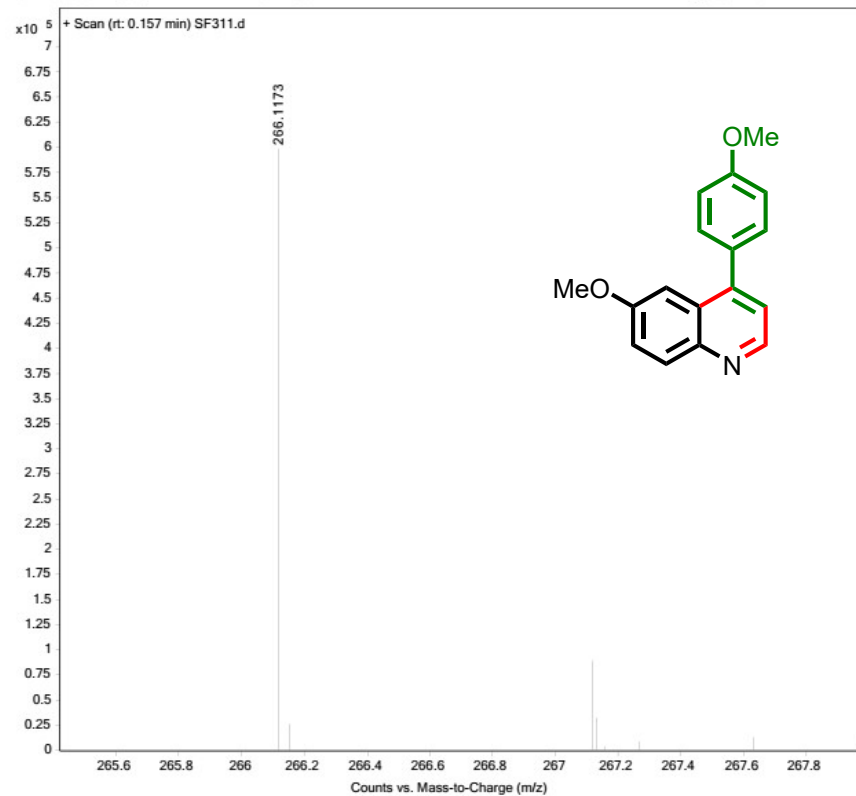

# <sup>1</sup>H NMR Spectrum of 4-(4-Fluorophenyl)-6-methoxyquinoline(3g)

ATK-SF-PA-4FE-DMS-1H.1.fid — ATK-SF-PA-4FE-DMS-1H

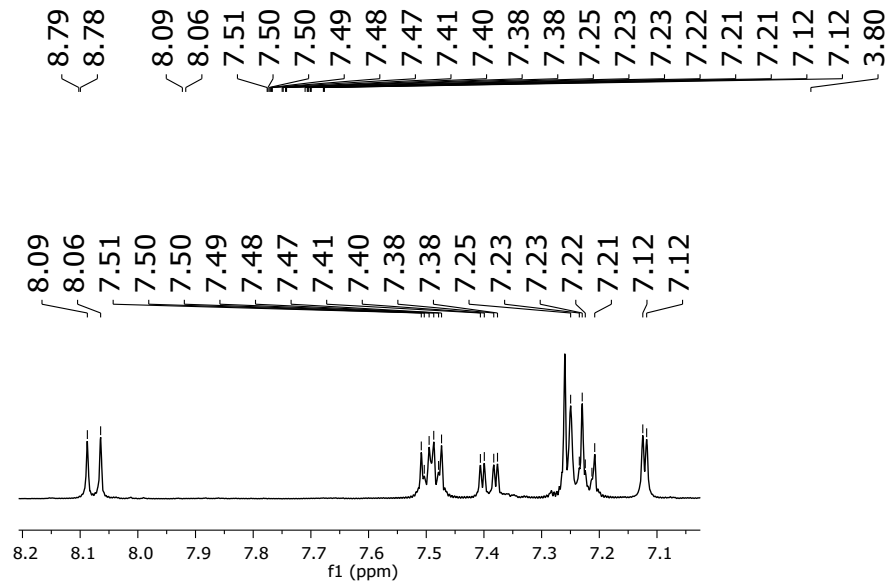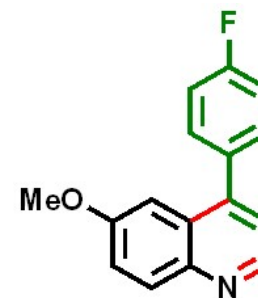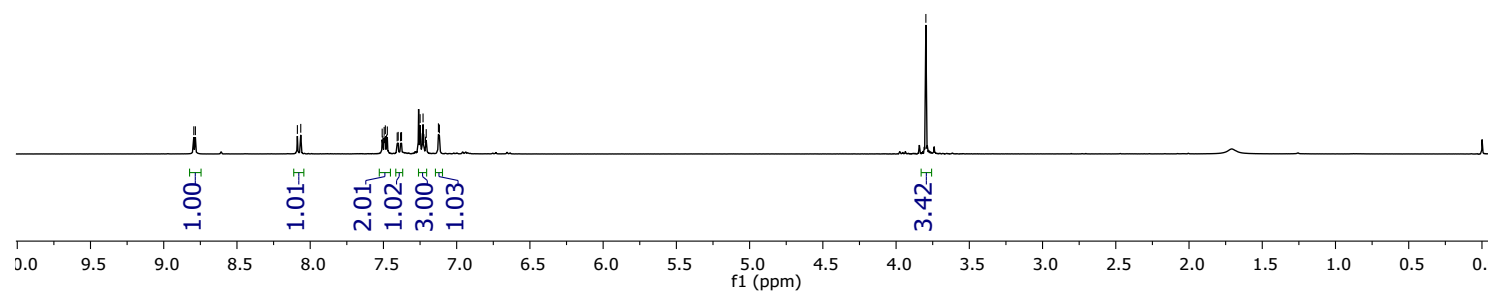

**<sup>13</sup>C NMR Spectrum of 4-(4-Fluorophenyl)-6-methoxyquinoline(3g)**

ATK-SF-PA-4FE-DMS-13C.3.fid — ATK-SF-PA-4FE-DMS-13C

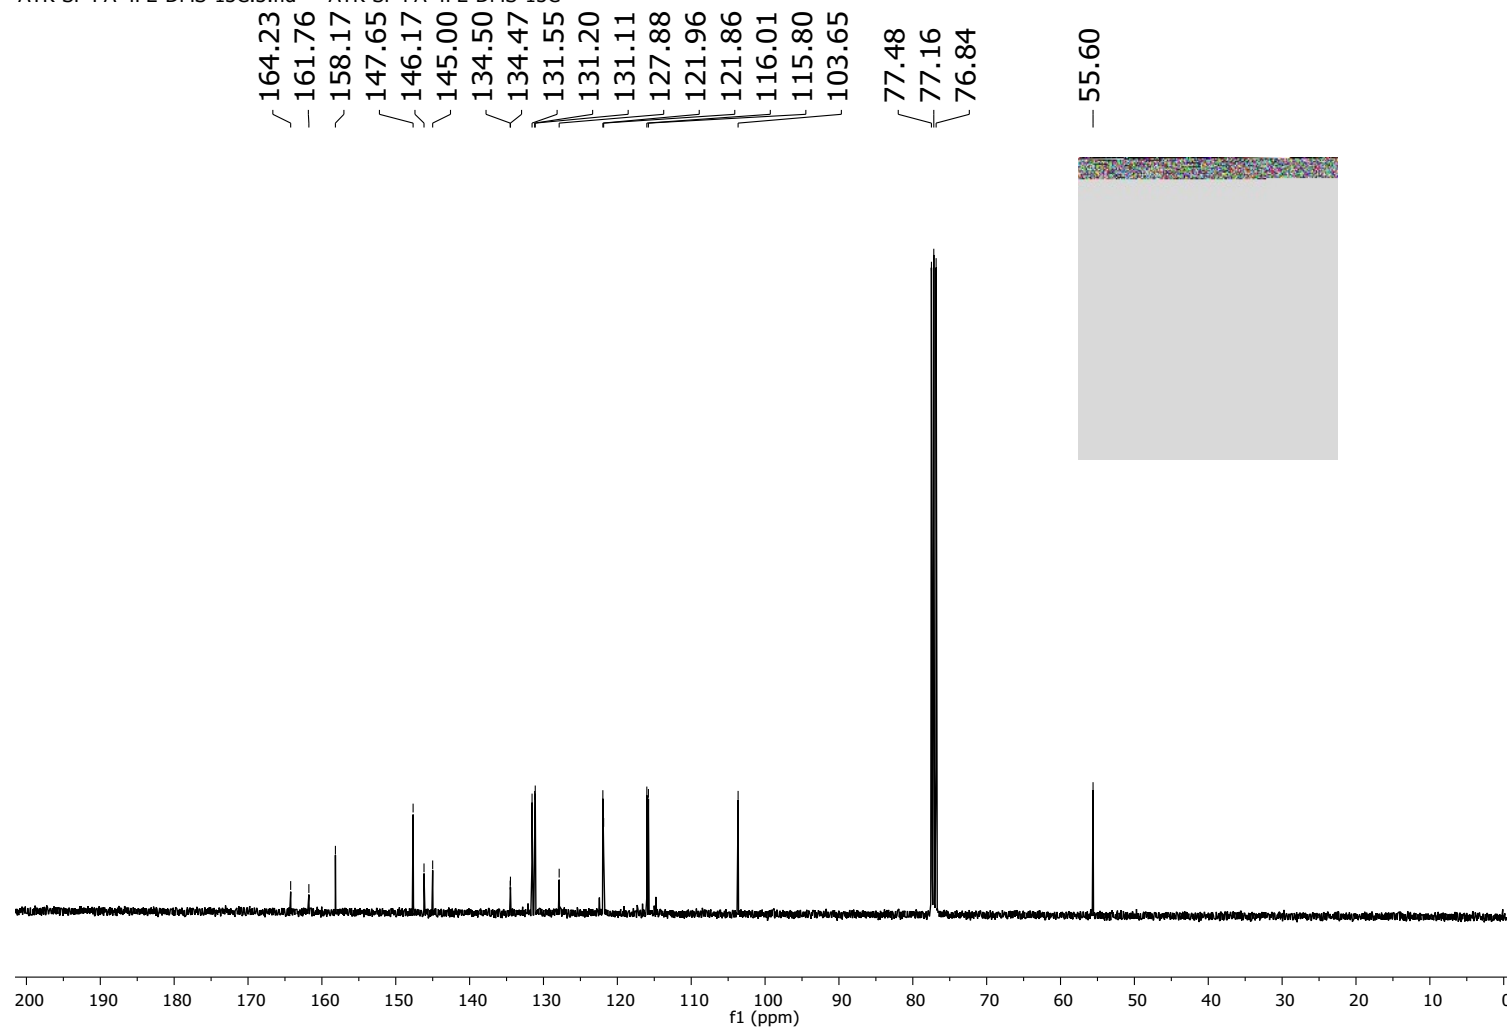

**<sup>19</sup>F NMR Spectrum of 4-(4-Fluorophenyl)-6-methoxyquinoline(3g)**

SF-F-4-2F-1H.1.fid — 19F

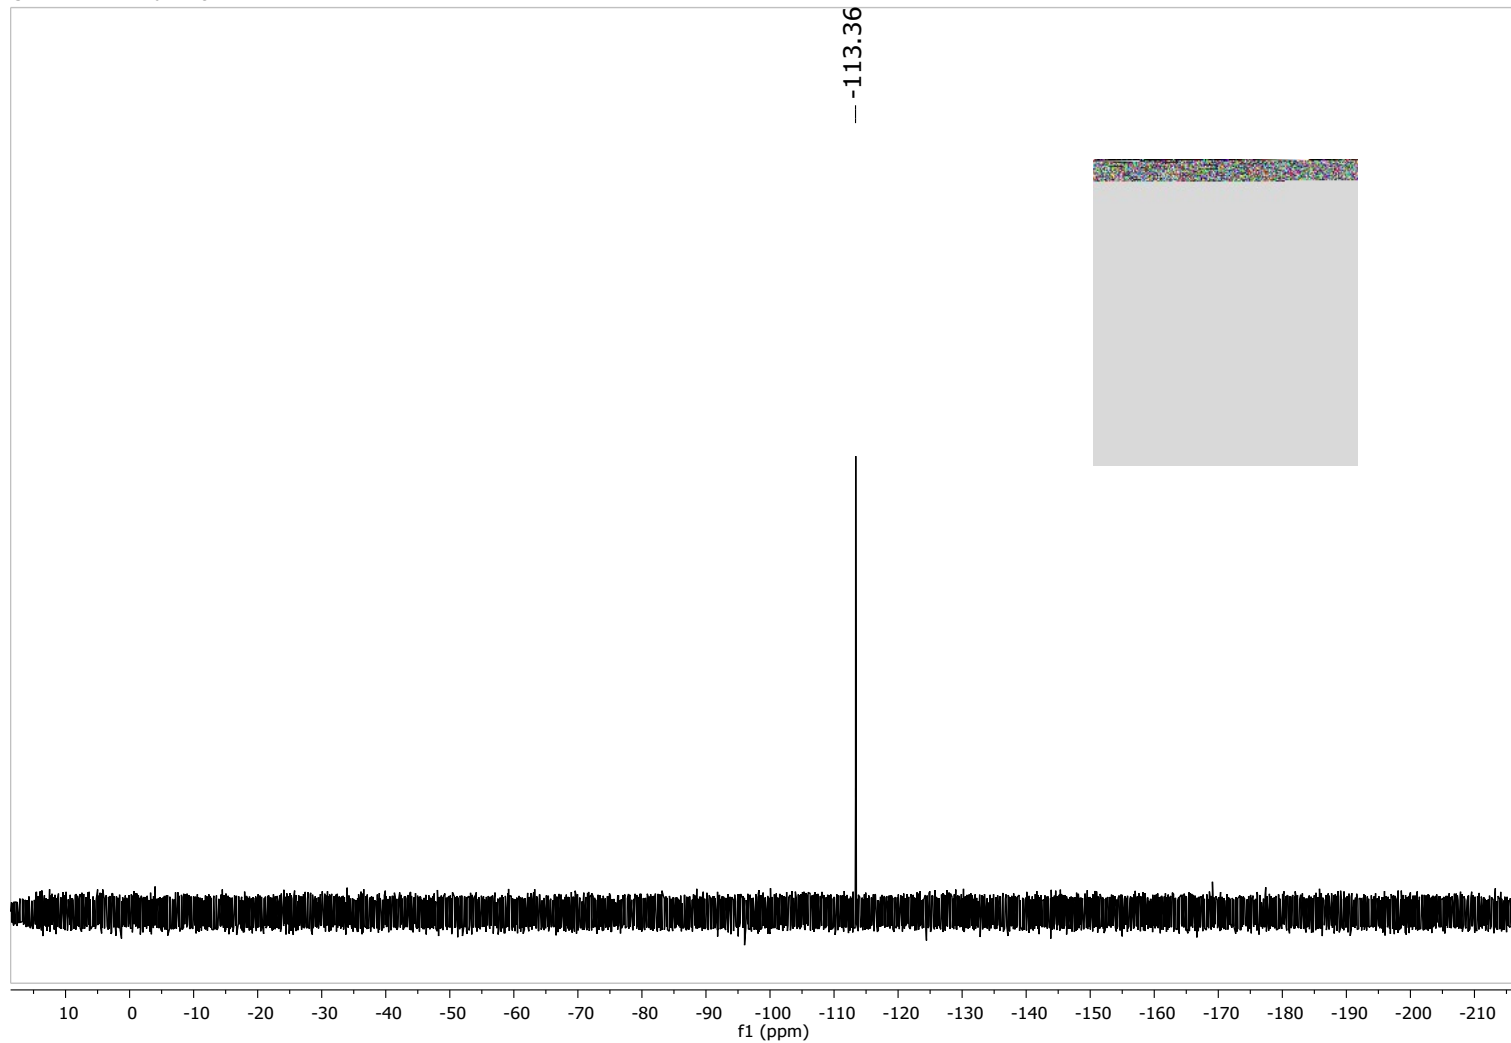

## HRMS Spectrum of 4-(4-Fluorophenyl)-6-methoxyquinoline(3g)

|                    |                             |                               |         |                        |                                 |
|--------------------|-----------------------------|-------------------------------|---------|------------------------|---------------------------------|
| <b>Sample Name</b> | Sample33                    | <b>Position</b>               | P1-C10  | <b>Instrument Name</b> | QTOF                            |
| <b>User Name</b>   | SYSTEM (SYSTEM)             | <b>Inj Vol</b>                | 5       | <b>InjPosition</b>     |                                 |
| <b>Sample Type</b> | Sample                      | <b>IRM Calibration Status</b> | Success | <b>Data Filename</b>   | RF106.d                         |
| <b>ACQ Method</b>  | DIRECT MASS_POSITIVE_D1_1.m | <b>Comment</b>                |         | <b>Acquired Time</b>   | 19-05-2023 16:28:19 (UTC+05:30) |

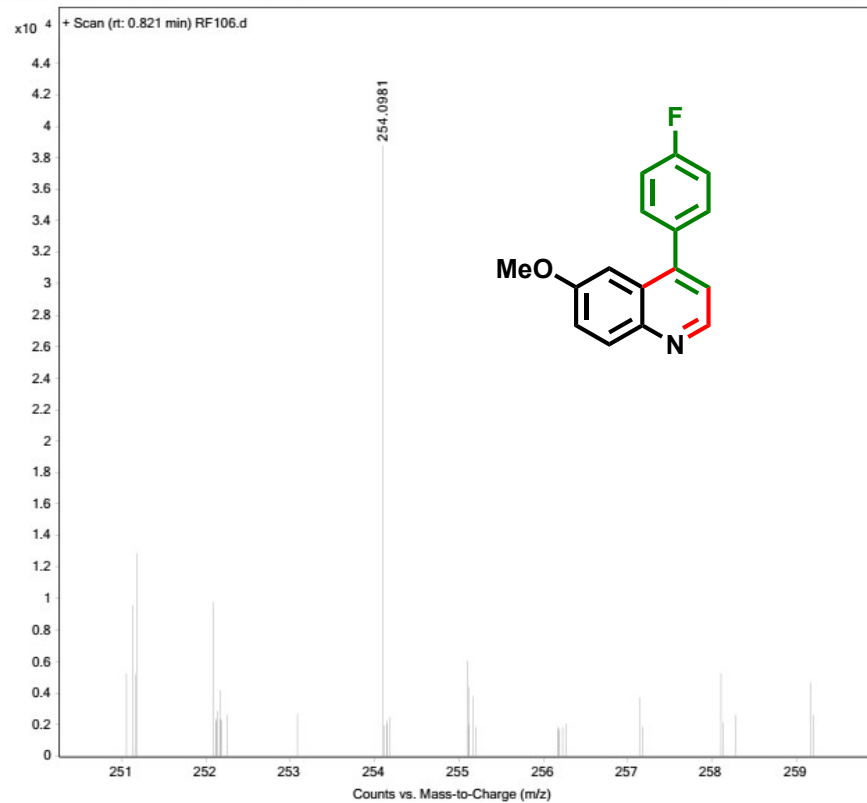

# <sup>1</sup>H NMR Spectrum of 4-(4-Bromophenyl)-6-methoxyquinoline(3h)

SF-PA-BR-EDMS-1H.1.fid — 1H

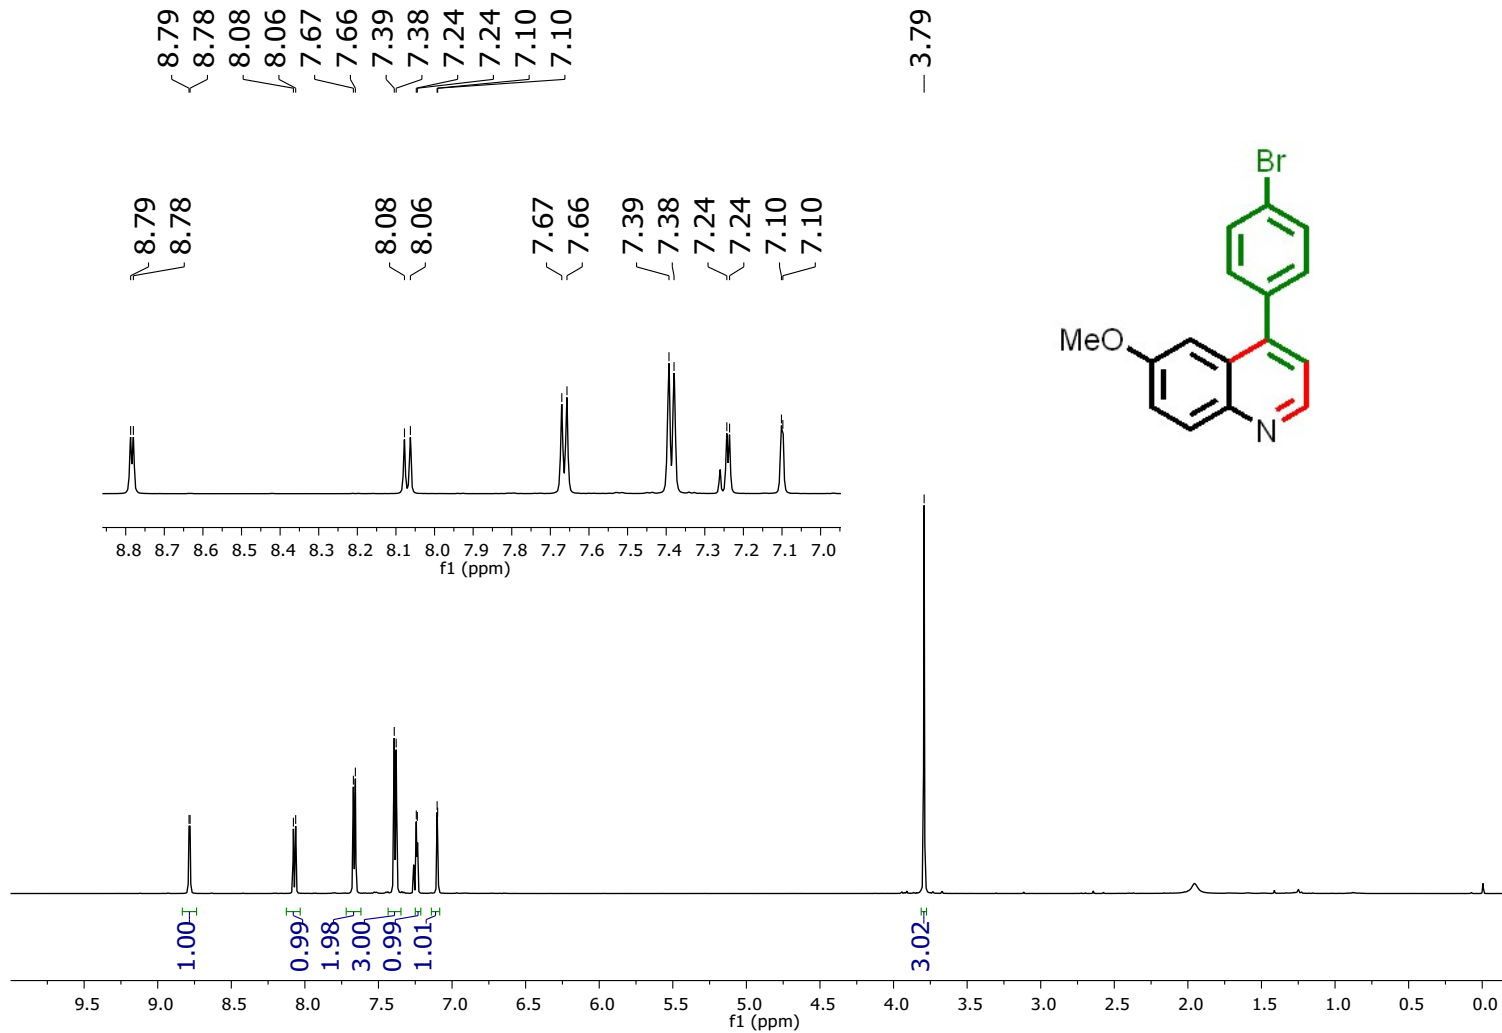



SF-PA-BR-EDMS-13C.1.fid — 13C

### <sup>13</sup>C NMR Spectrum of 4-(4-Bromophenyl)-6-methoxyquinoline(3h)

- 158.19
- 147.59
- 145.89
- 144.93
- 137.37
- 132.04
- 131.52
- 131.04
- 127.51
- 122.84
- 122.10
- 121.65
- 103.38
- 77.37
- 77.16
- 76.95
- 55.61

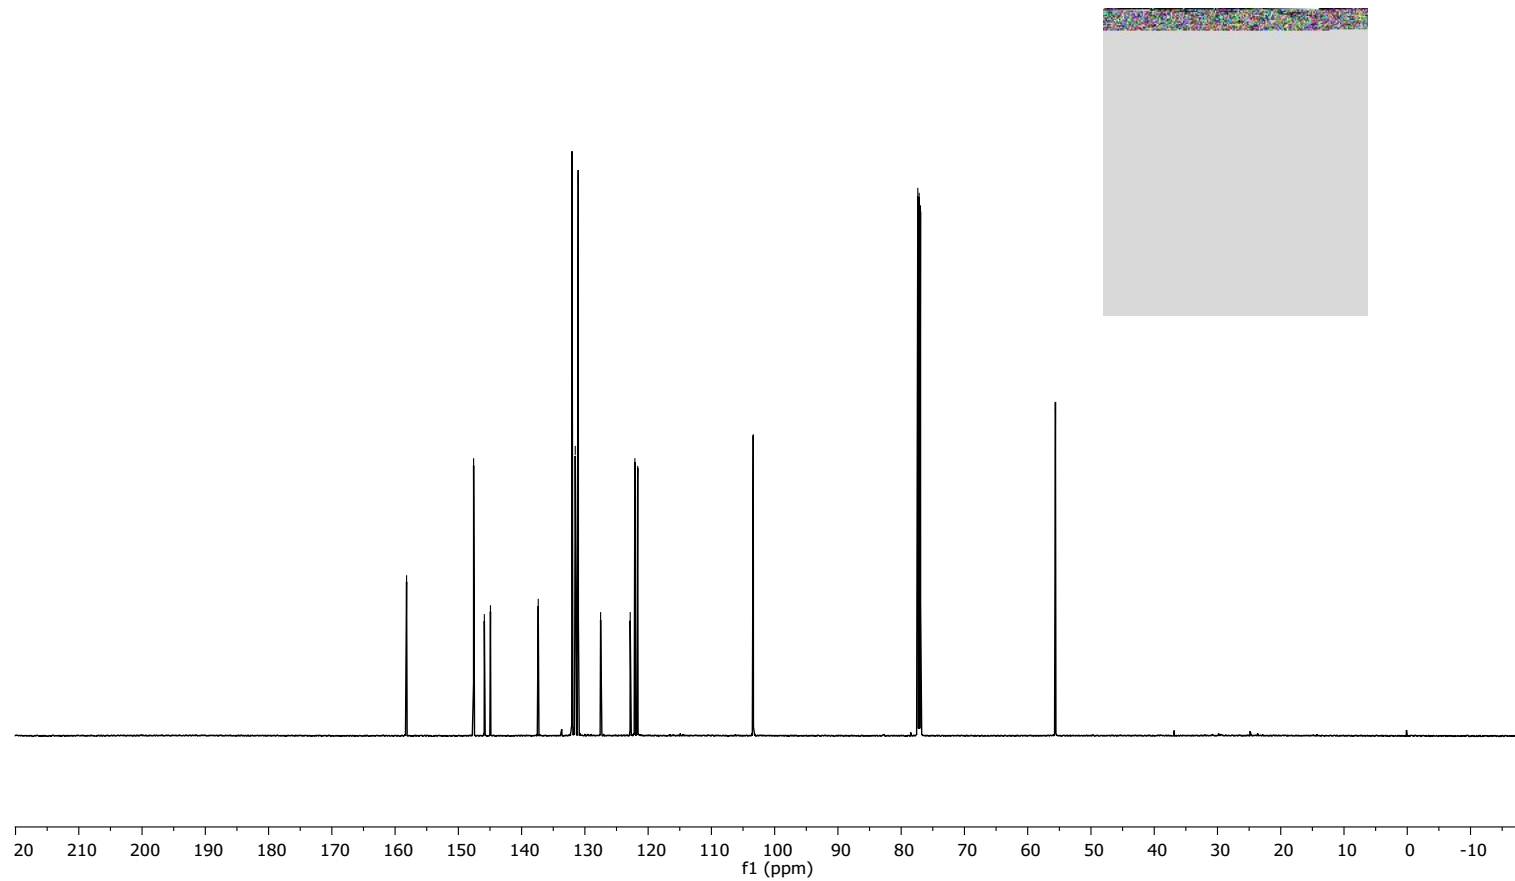

## HRMS Spectrum of 4-(4-Bromophenyl)-6-methoxyquinoline(3h)

|             |                           |                        |         |                 |                                 |
|-------------|---------------------------|------------------------|---------|-----------------|---------------------------------|
| Sample Name | Sample15                  | Position               | P1-B4   | Instrument Name | QTOF                            |
| User Name   | SYSTEM (SYSTEM)           | Inj Vol                | 5       | InjPosition     |                                 |
| Sample Type | Sample                    | IRM Calibration Status | Success | Data Filename   | ATKESF2.d                       |
| ACQ Method  | DIRECT MASS_POSITIVE_01.m | Comment                |         | Acquired Time   | 17-04-2023 12:15:49 (UTC+05:30) |

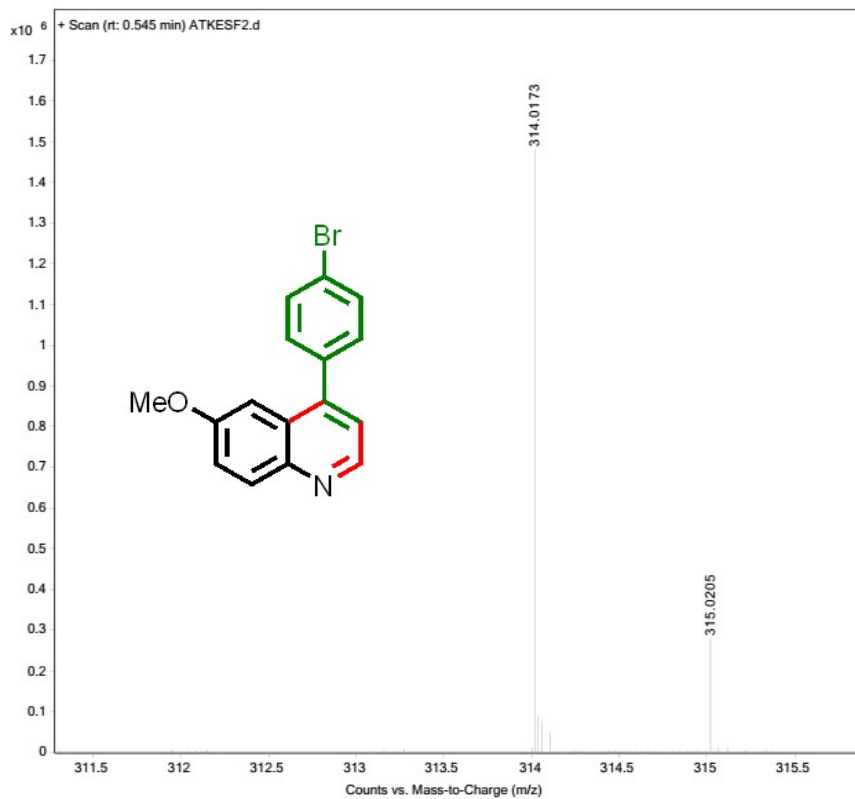

# <sup>1</sup>H NMR Spectrum of 6-Methoxy-4-(2-(trifluoromethyl)phenyl)quinoline(3i)

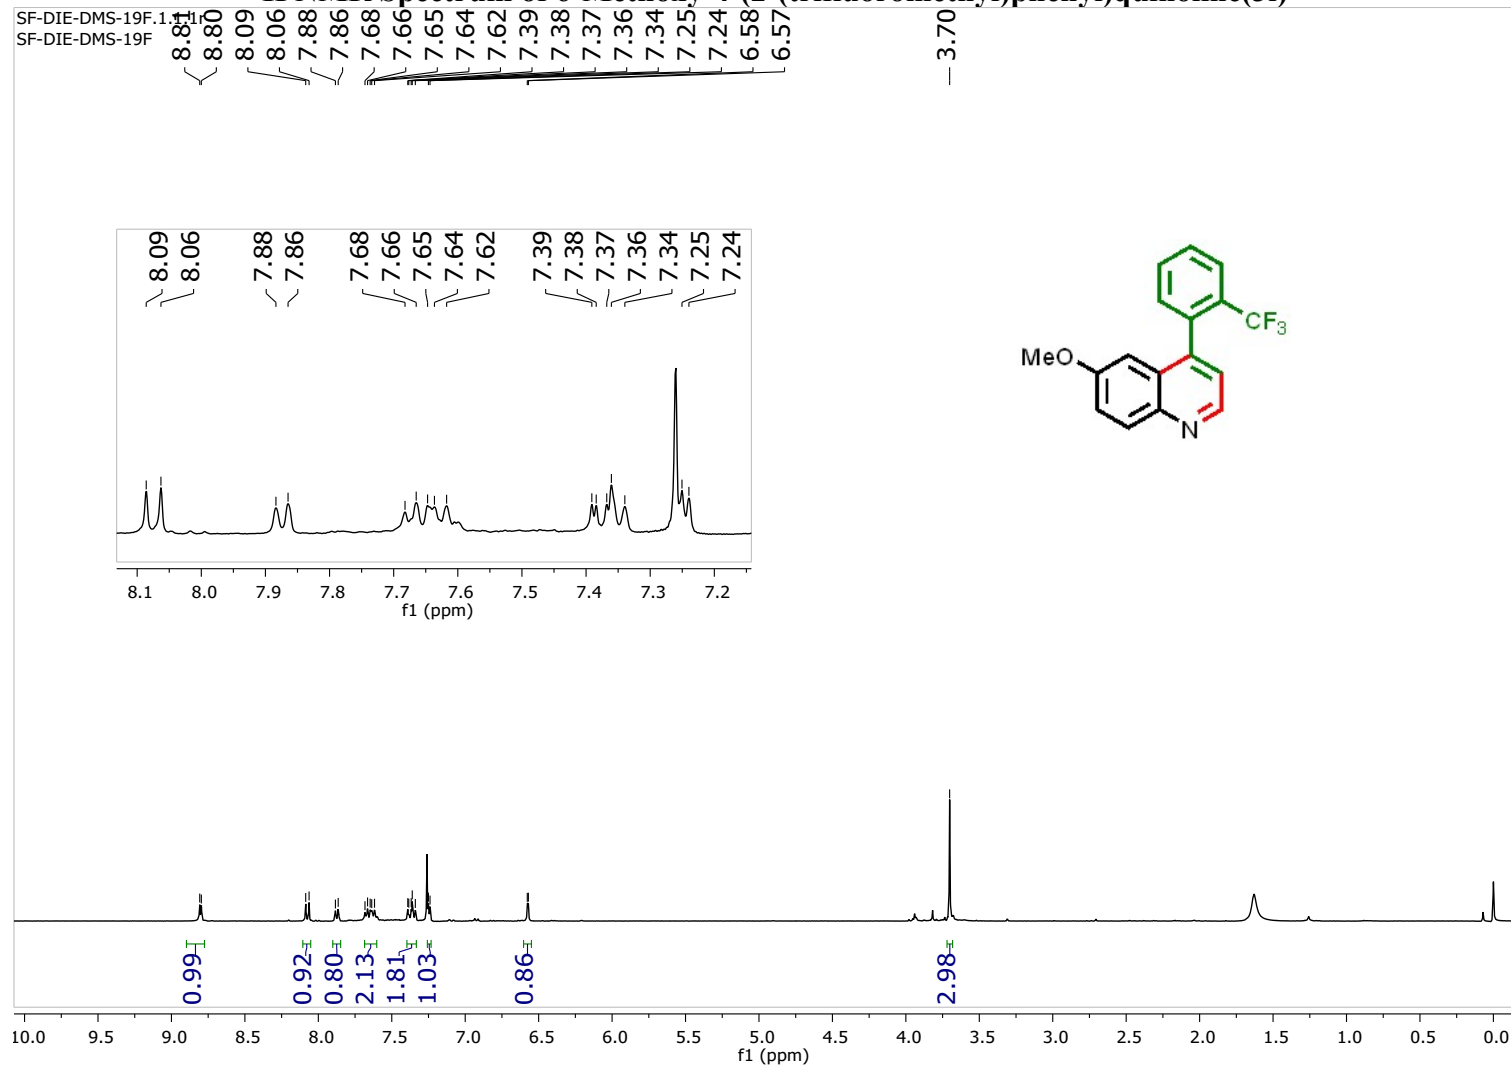

**<sup>13</sup>C NMR Spectrum of 6-Methoxy-4-(2-(trifluoromethyl)phenyl)quinoline(3i)**

SF-DI-E-DMS\_13C.11.fid - SF-DI-E-DMS\_13C

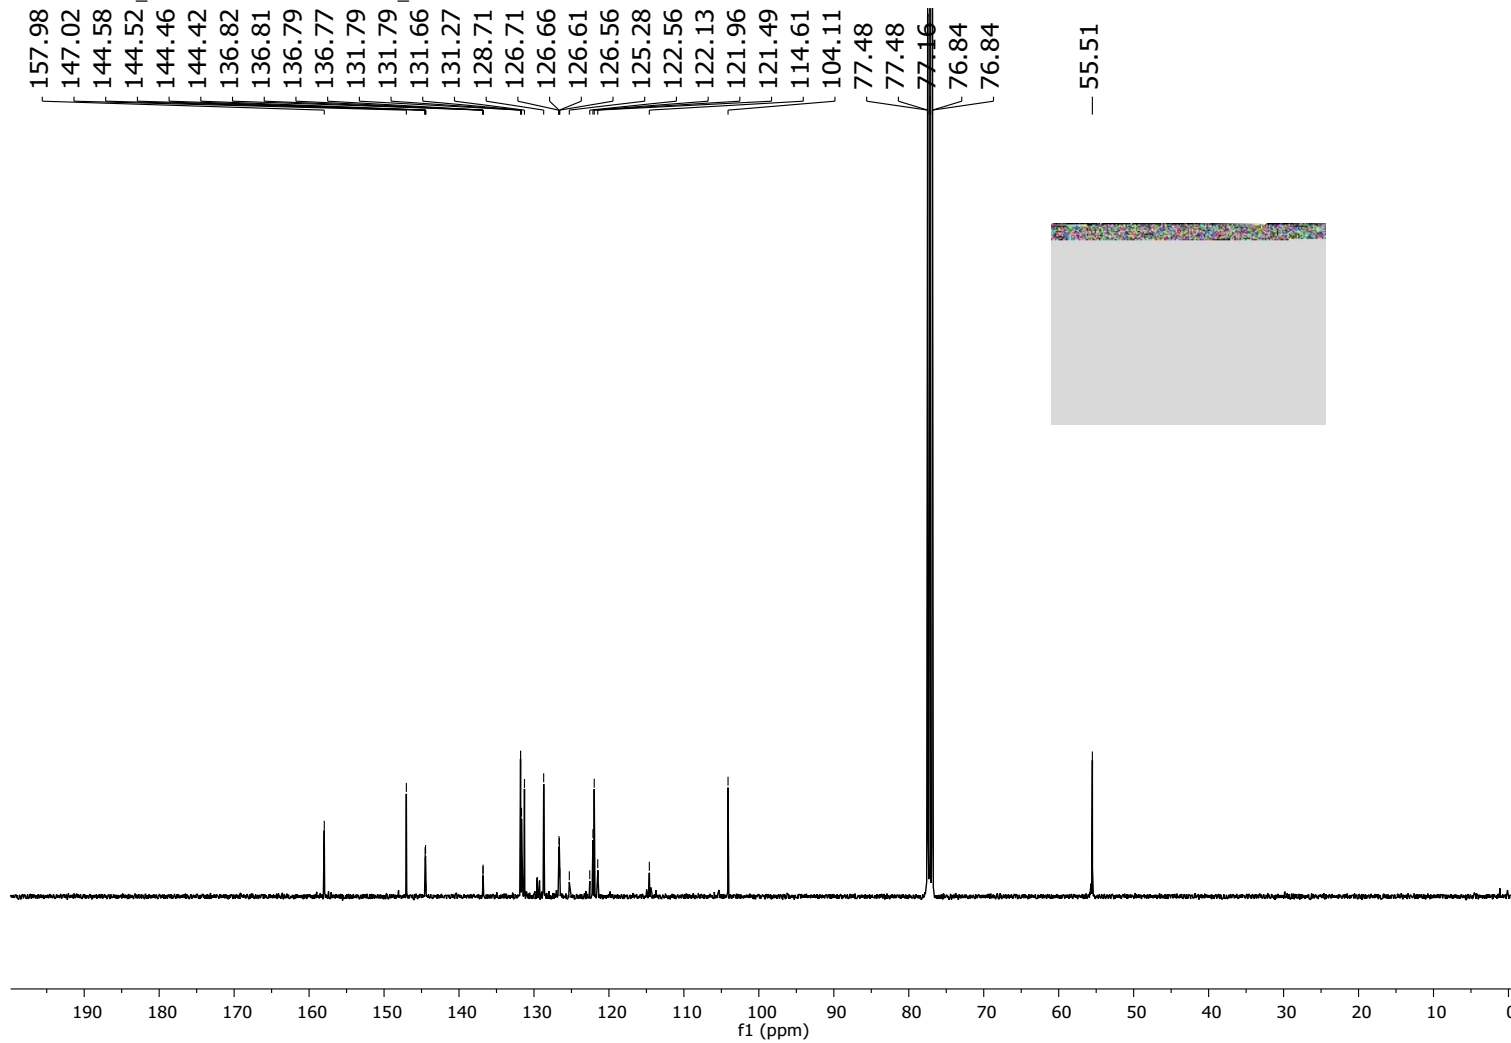

**<sup>19</sup>F NMR Spectrum of 6-Methoxy-4-(2-(trifluoromethyl)phenyl)quinoline(3i).**

SF-DI-E-DMS-19F.1.fid — SF-DI-E-DMS-19F

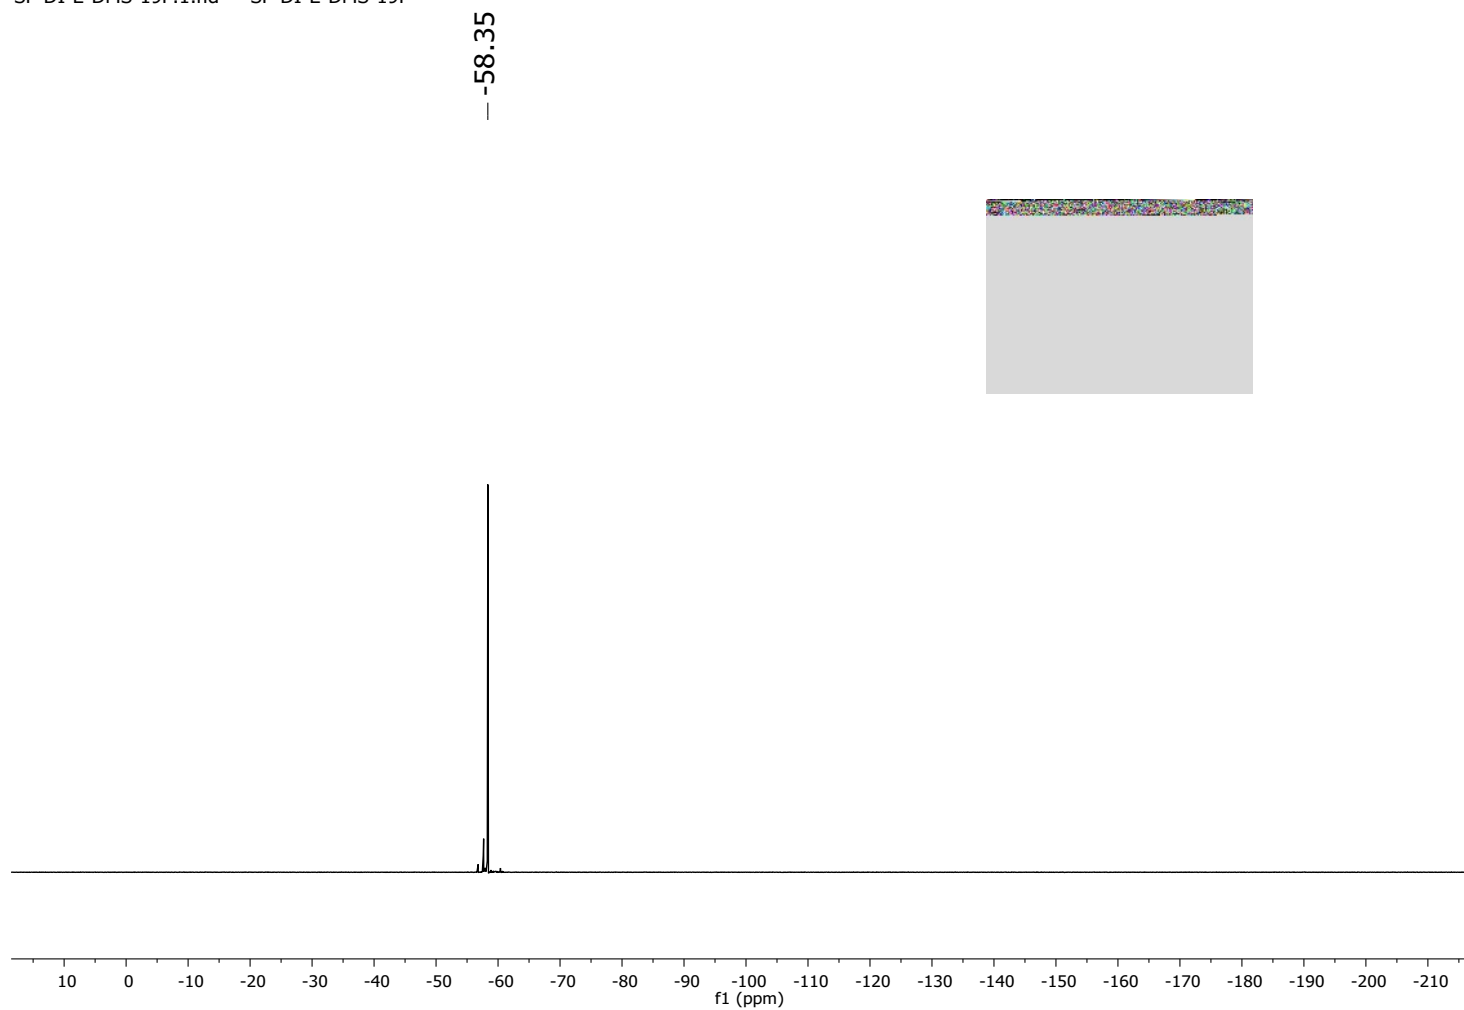

## HRMS Spectrum of 6-Methoxy-4-(2-(trifluoromethyl)phenyl)quinoline(3i)

|                    |                             |                               |         |                        |                                 |
|--------------------|-----------------------------|-------------------------------|---------|------------------------|---------------------------------|
| <b>Sample Name</b> | Sample45                    | <b>Position</b>               | P1-D11  | <b>Instrument Name</b> | QTOF                            |
| <b>User Name</b>   | SYSTEM (SYSTEM)             | <b>Inj Vol</b>                | 5       | <b>InjPosition</b>     |                                 |
| <b>Sample Type</b> | Sample                      | <b>IRM Calibration Status</b> | Success | <b>Data Filename</b>   | SF 301.d                        |
| <b>ACQ Method</b>  | DIRECT MASS_POSITIVE_01_1.m | <b>Comment</b>                |         | <b>Acquired Time</b>   | 24-04-2023 15:21:22 (UTC+05:30) |

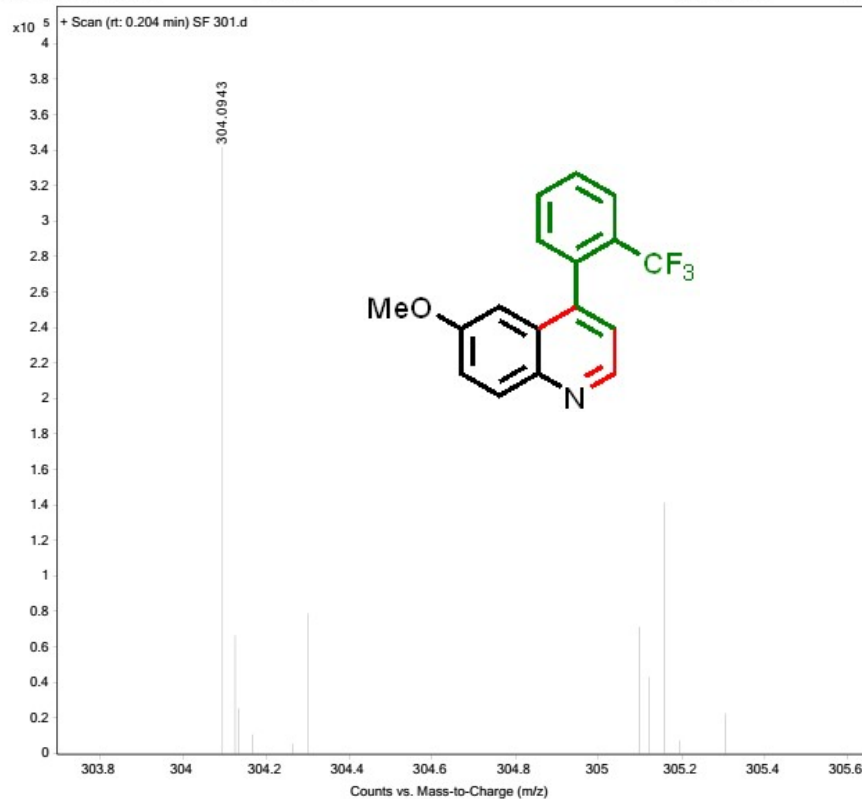

# <sup>1</sup>H NMR Spectrum of 4-(3-Ethynylphenyl)-6-methoxyquinoline (3j)

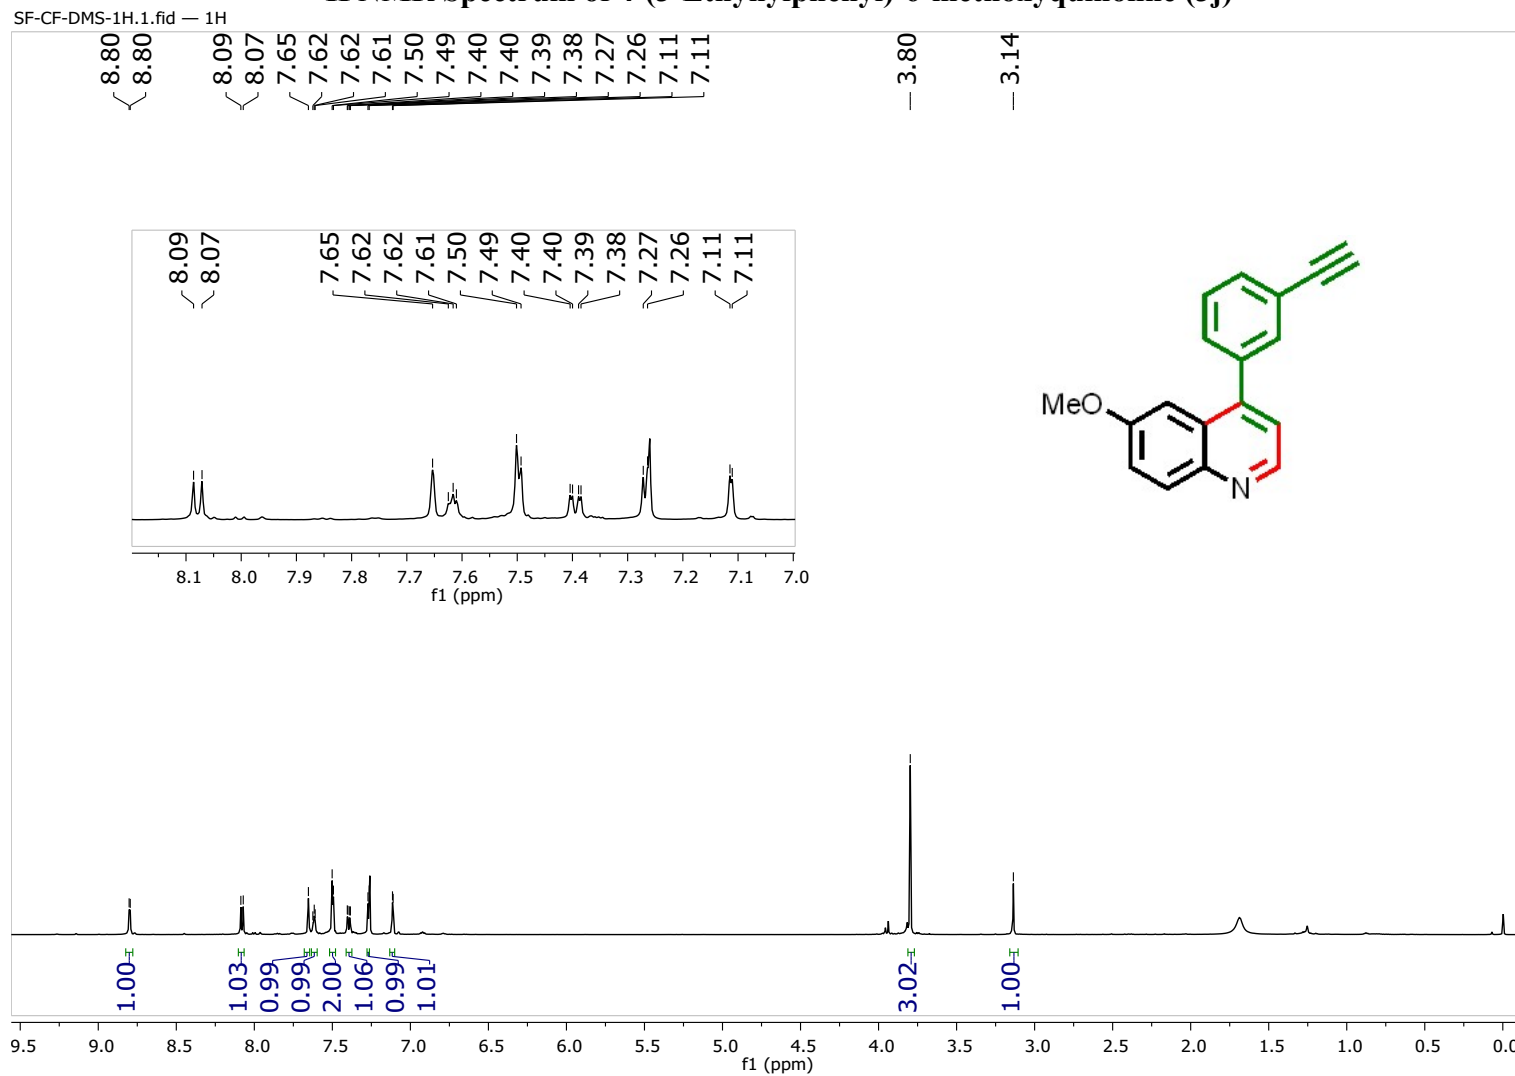

**<sup>13</sup>C NMR Spectrum of 4-(3-Ethynylphenyl)-6-methoxyquinoline (3j)**

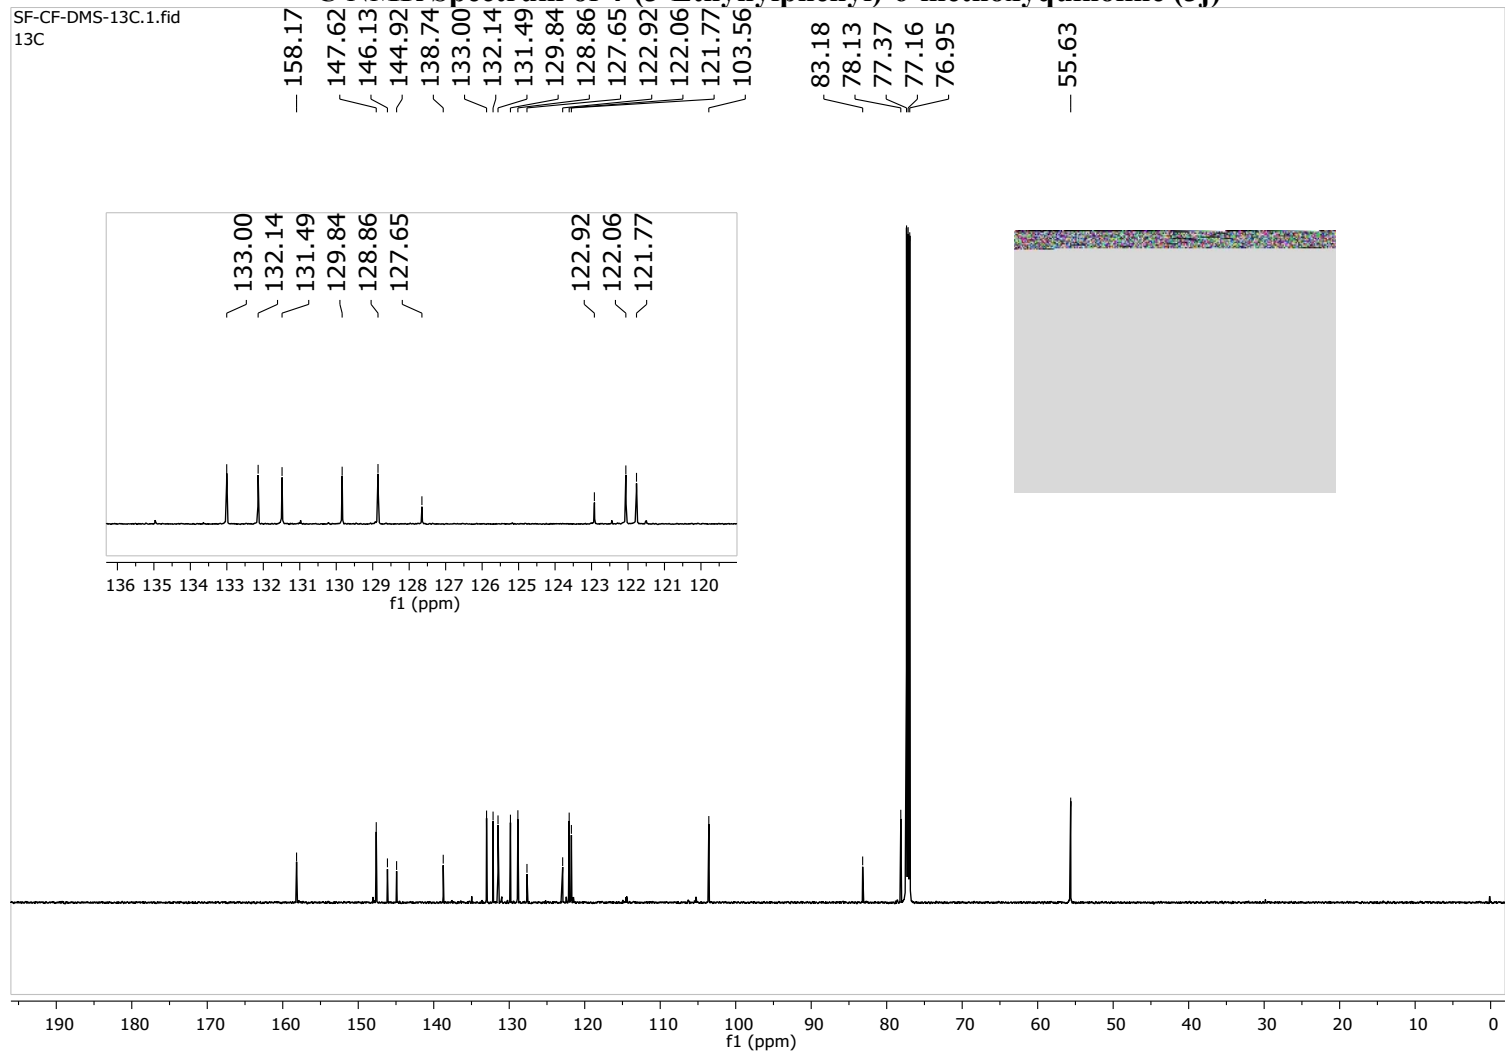



## HRMS Spectrum of 4-(3-Ethynylphenyl)-6-methoxyquinoline (3j)

|                    |                           |                               |         |                        |                                 |
|--------------------|---------------------------|-------------------------------|---------|------------------------|---------------------------------|
| <b>Sample Name</b> | Sample23                  | <b>Position</b>               | P1-C1   | <b>Instrument Name</b> | QTOF                            |
| <b>User Name</b>   | SYSTEM (SYSTEM)           | <b>Inj Vol</b>                | 5       | <b>InjPosition</b>     |                                 |
| <b>Sample Type</b> | Sample                    | <b>IRM Calibration Status</b> | Success | <b>Data Filename</b>   | ATKRRK 84.d                     |
| <b>ACQ Method</b>  | DIRECT MASS_POSITIVE_01.m | <b>Comment</b>                |         | <b>Acquired Time</b>   | 12-04-2023 16:21:48 (UTC+05:30) |

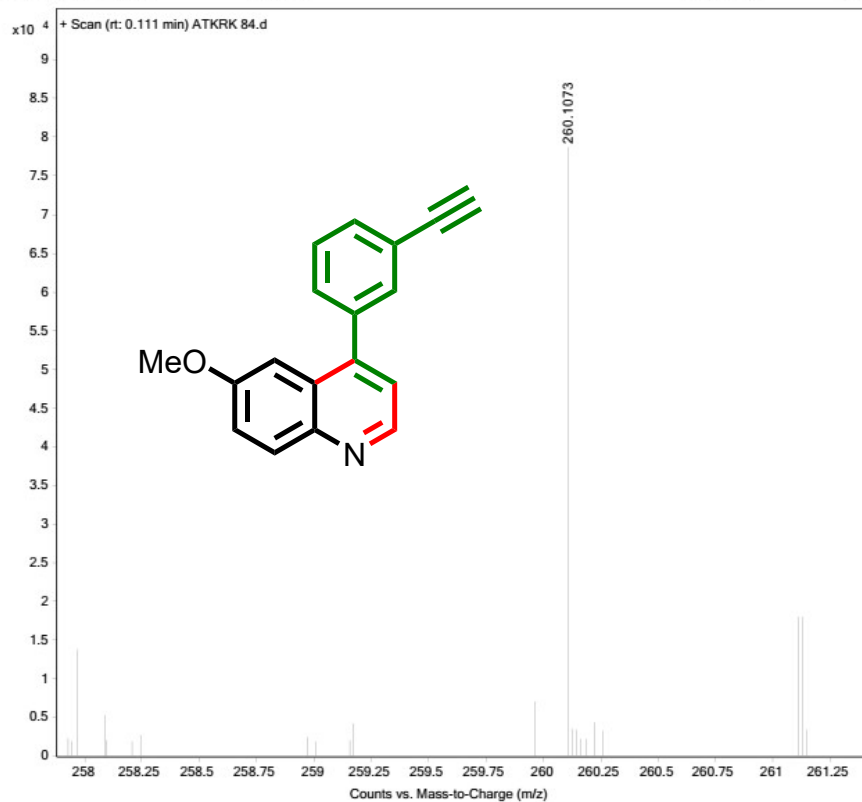

### <sup>1</sup>H NMR Spectrum of 6-Methoxy-4-(pyridin-2-yl)quinoline (3k)

SF-PA-PYR-DMS-1H.1.fid - 1H

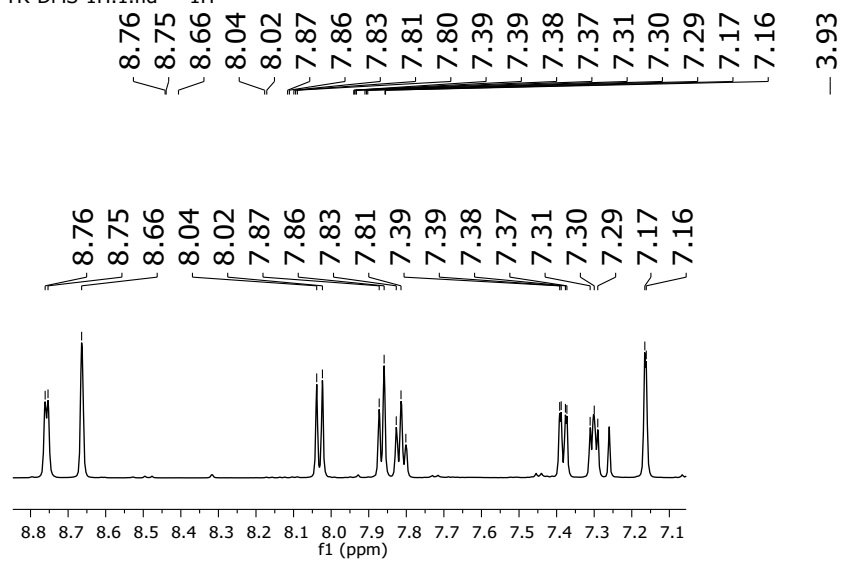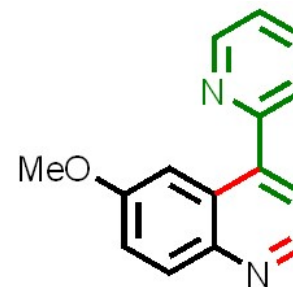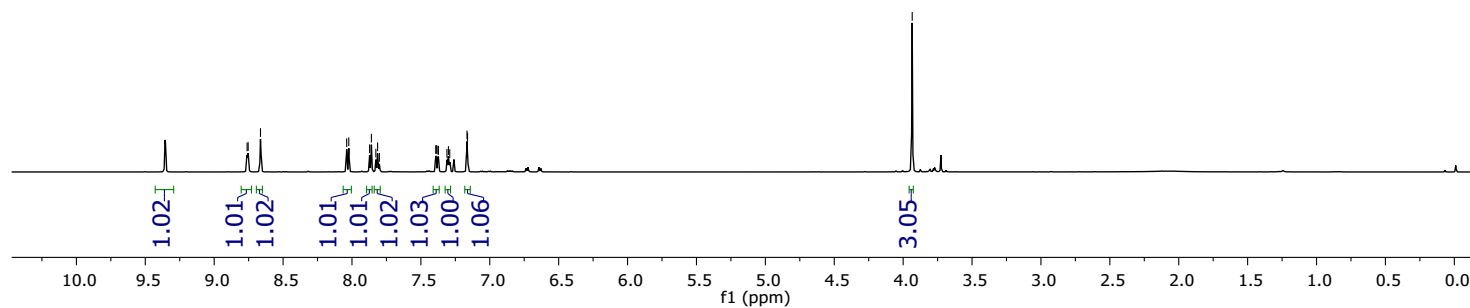

**<sup>13</sup>C NMR Spectrum of 6-Methoxy-4-(pyridin-2-yl)quinoline (3k)**

SF-PA-PYR-DMS-13C.3.fid - 13C

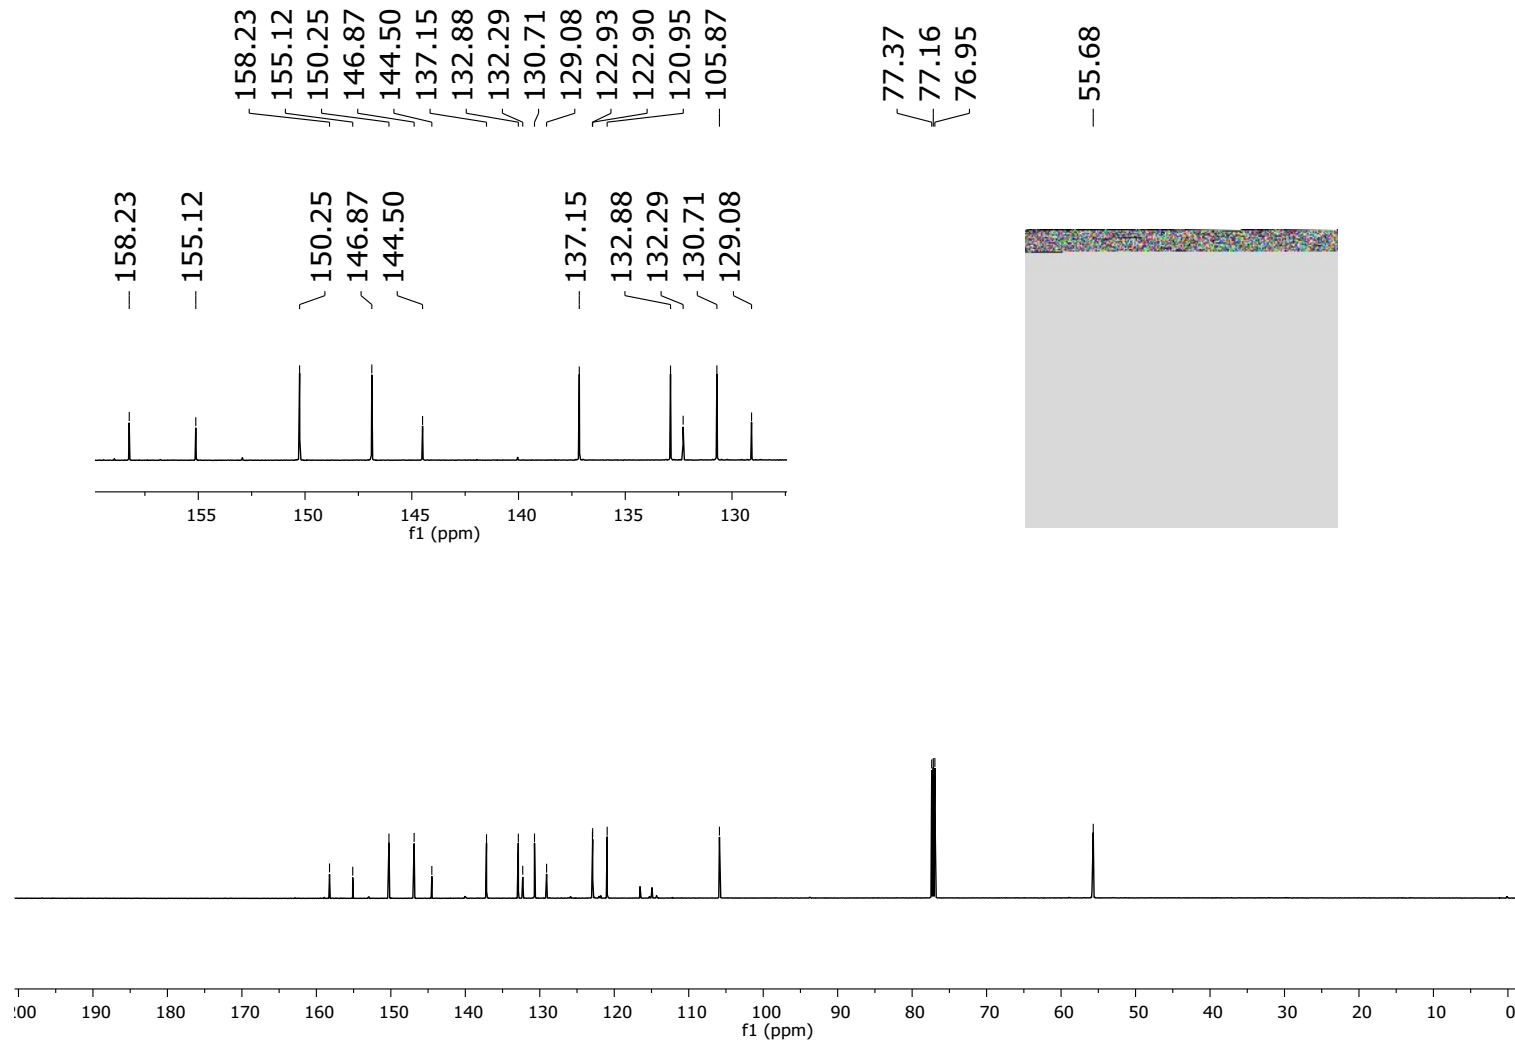

## HRMS Spectrum of 6-Methoxy-4-(pyridin-2-yl)quinoline (3k)

|                    |                           |                               |         |                        |                                 |
|--------------------|---------------------------|-------------------------------|---------|------------------------|---------------------------------|
| <b>Sample Name</b> | Sample62                  | <b>Position</b>               | P1-C2   | <b>Instrument Name</b> | QTOF                            |
| <b>User Name</b>   | SYSTEM (SYSTEM)           | <b>Inj Vol</b>                | 5       | <b>InjPosition</b>     |                                 |
| <b>Sample Type</b> | Sample                    | <b>IRM Calibration Status</b> | Success | <b>Data Filename</b>   | ATK RF4.d                       |
| <b>ACQ Method</b>  | DIRECT MASS_POSITIVE_01.m | <b>Comment</b>                |         | <b>Acquired Time</b>   | 17-04-2023 16:25:16 (UTC+05:30) |

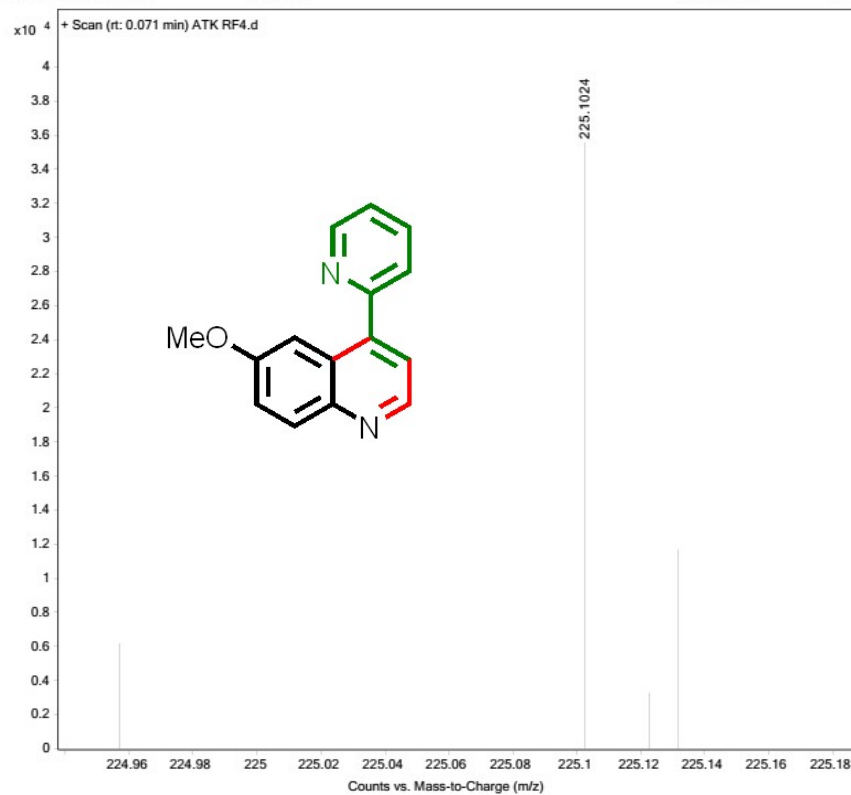

# <sup>1</sup>H NMR Spectrum of 6-Methoxy-4-(thiophen-3-yl)quinoline(3I)

SF-PA-TH-PMS-1H.1.fid — 1H

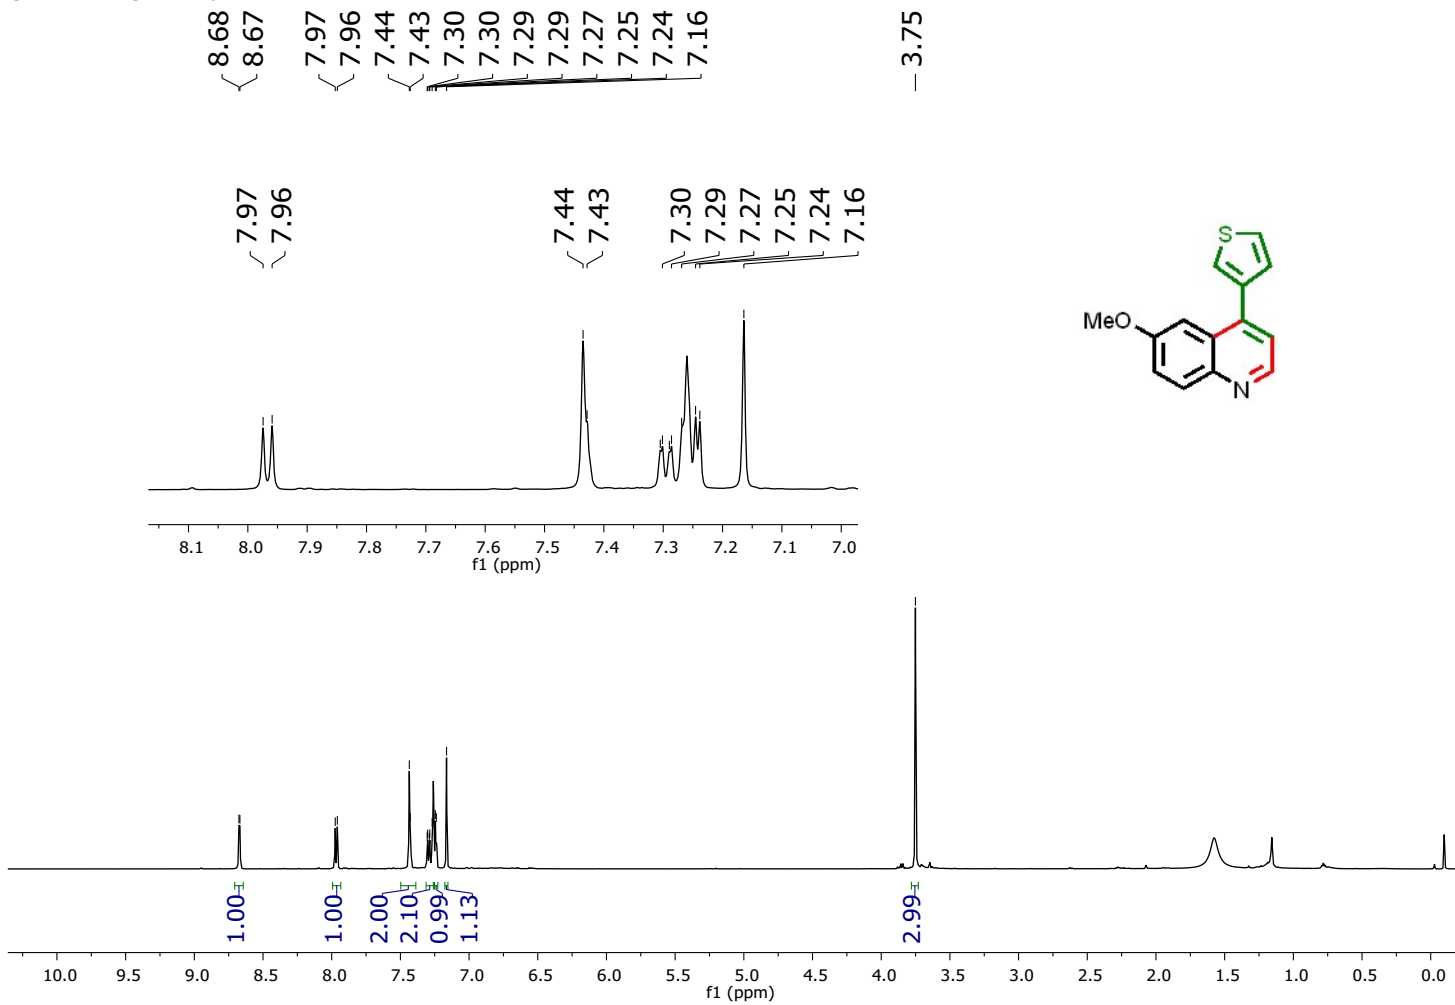

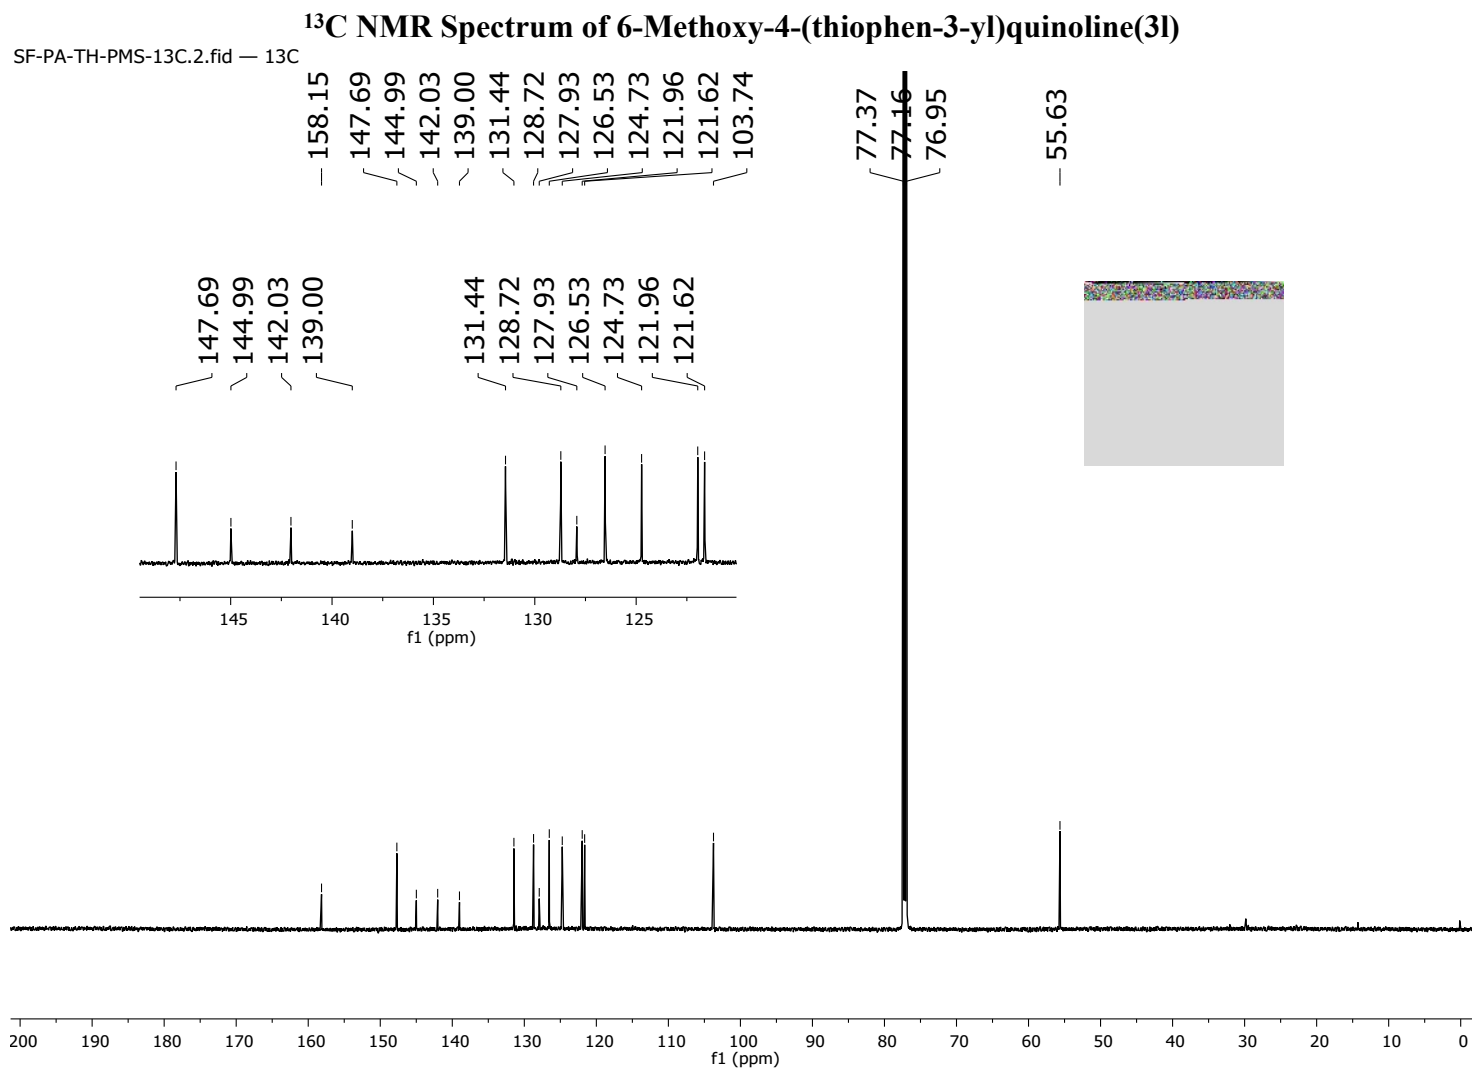

## HRMS Spectrum of 6-Methoxy-4-(thiophen-3-yl)quinoline(3I)

|                    |                             |                               |         |                        |                                 |
|--------------------|-----------------------------|-------------------------------|---------|------------------------|---------------------------------|
| <b>Sample Name</b> | Sample19                    | <b>Position</b>               | P1-BB   | <b>Instrument Name</b> | QTOF                            |
| <b>User Name</b>   | SYSTEM (SYSTEM)             | <b>Inj Vol</b>                | 5       | <b>InjPosition</b>     |                                 |
| <b>Sample Type</b> | Sample                      | <b>IRM Calibration Status</b> | Success | <b>Data Filename</b>   | SF-4084.d                       |
| <b>ACQ Method</b>  | DIRECT MASS_POSITIVE_01_1.m | <b>Comment</b>                |         | <b>Acquired Time</b>   | 02-05-2023 11:06:40 (UTC+05:30) |

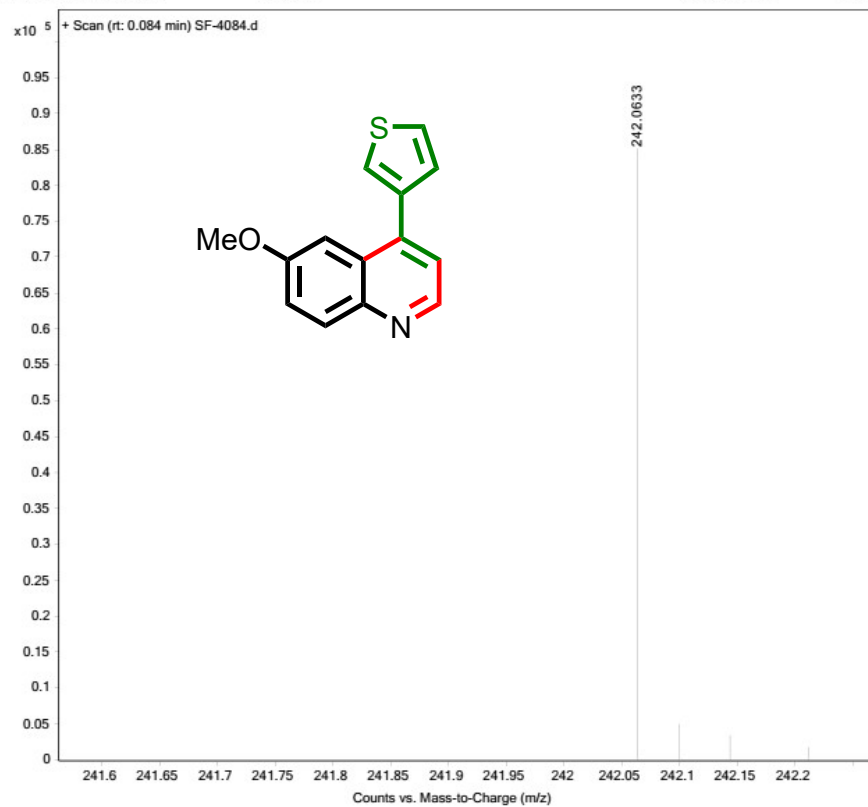

# <sup>1</sup>H NMR Spectrum of 6-Methoxy-3,4-diphenylquinoline(3m)

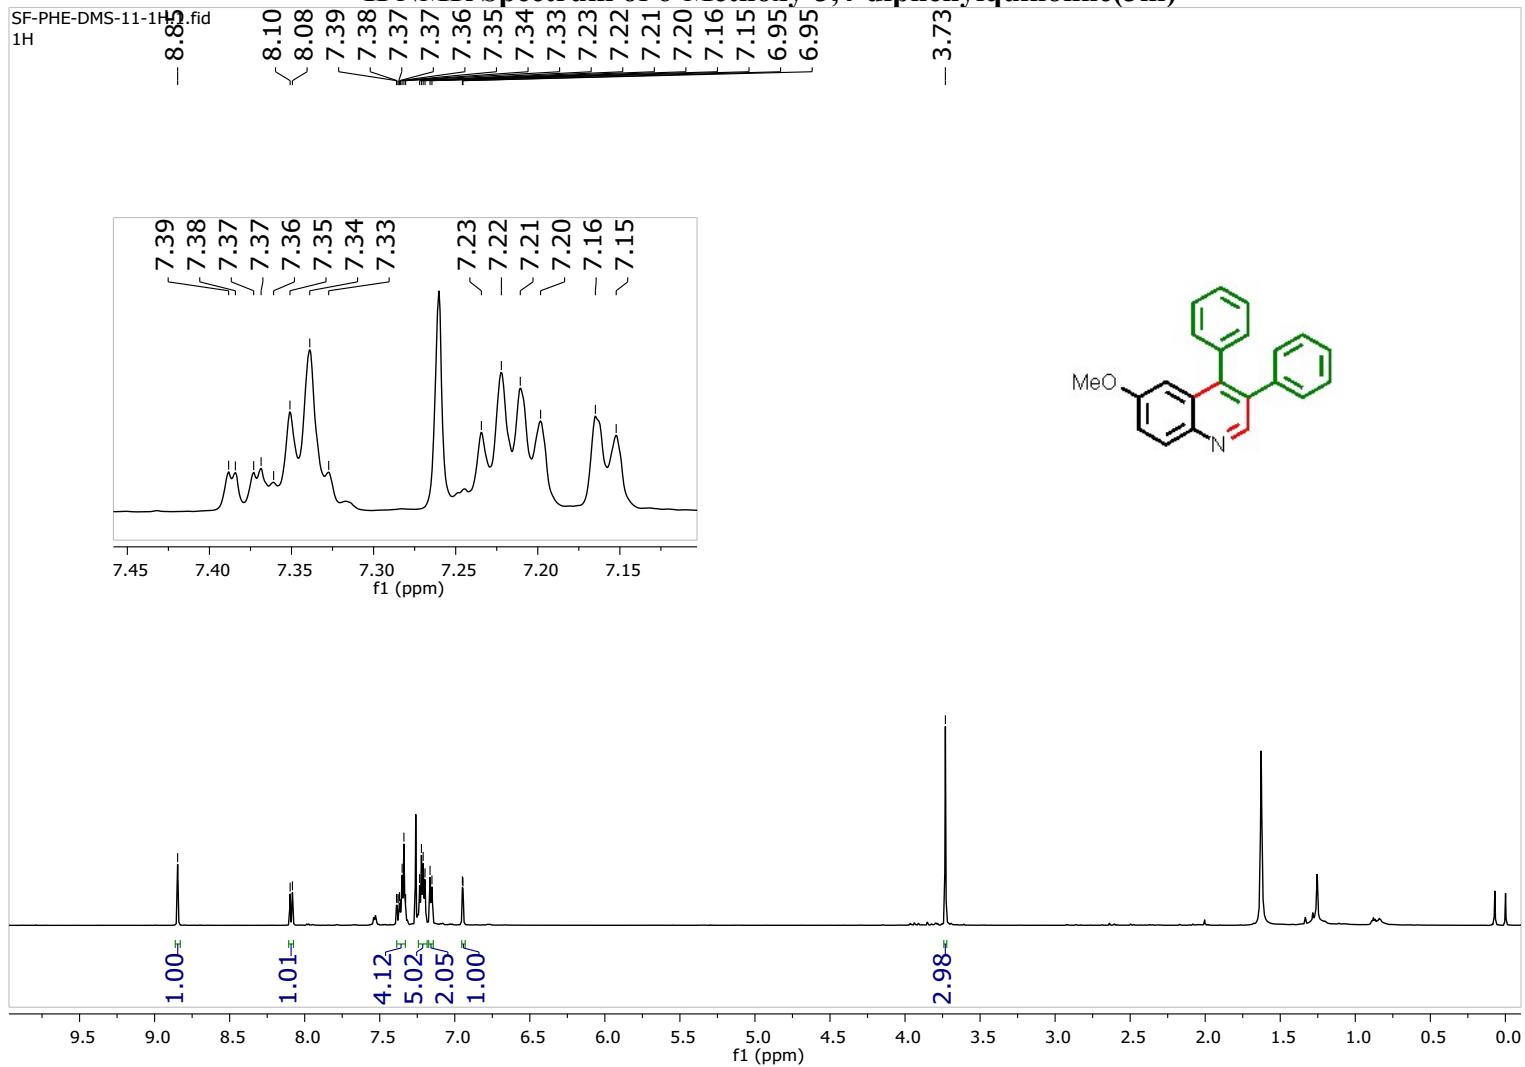



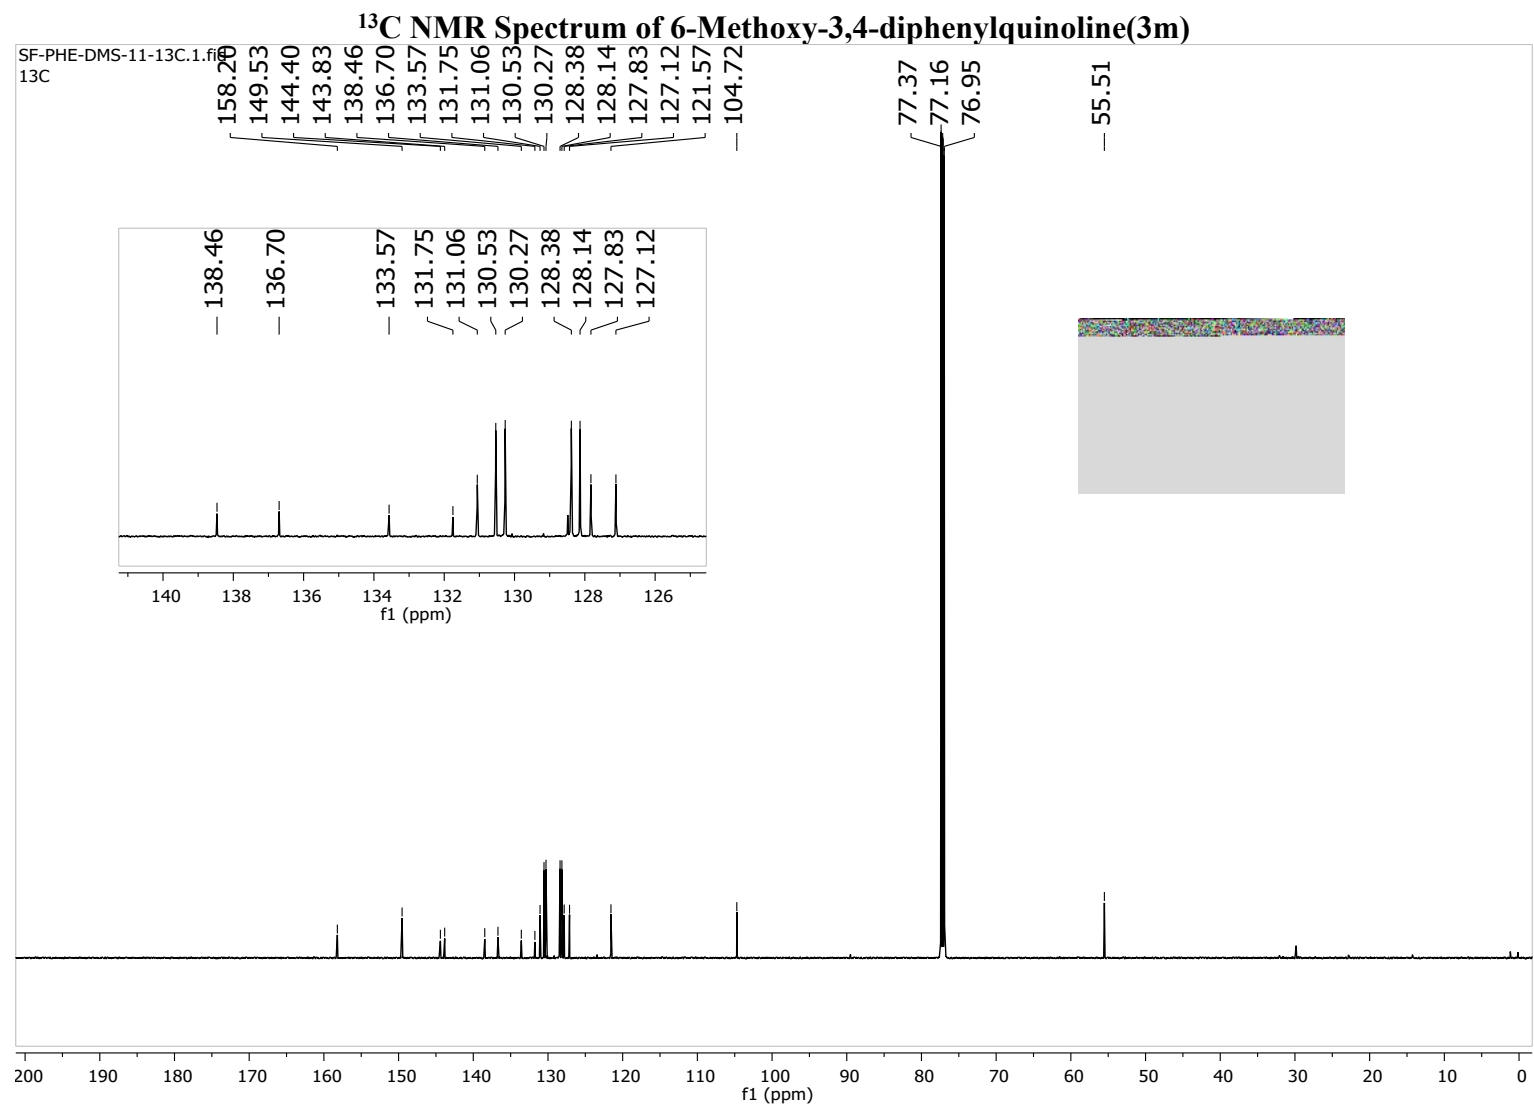

## HRMS Spectrum of 6-Methoxy-3,4-diphenylquinoline(3m)

|                    |                             |                               |         |                        |                                 |
|--------------------|-----------------------------|-------------------------------|---------|------------------------|---------------------------------|
| <b>Sample Name</b> | Sample48                    | <b>Position</b>               | P1-E2   | <b>Instrument Name</b> | QTOF                            |
| <b>User Name</b>   | SYSTEM (SYSTEM)             | <b>Inj Vol</b>                | 5       | <b>InjPosition</b>     |                                 |
| <b>Sample Type</b> | Sample                      | <b>IRM Calibration Status</b> | Success | <b>Data Filename</b>   | SF-303.d                        |
| <b>ACQ Method</b>  | DIRECT MASS_POSITIVE_01_1.m | <b>Comment</b>                |         | <b>Acquired Time</b>   | 24-04-2023 15:25:28 (UTC+05:30) |

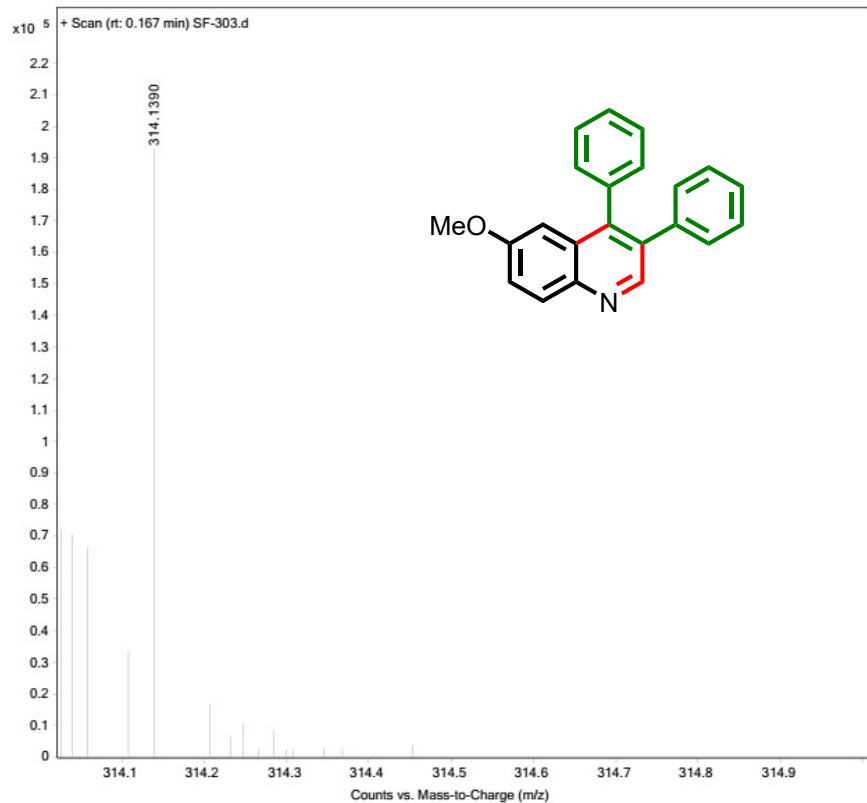

# <sup>1</sup>H NMR Spectrum of 4-(4-(*tert*-Butyl)phenyl)-6-(methylthio)quinoline (3n)

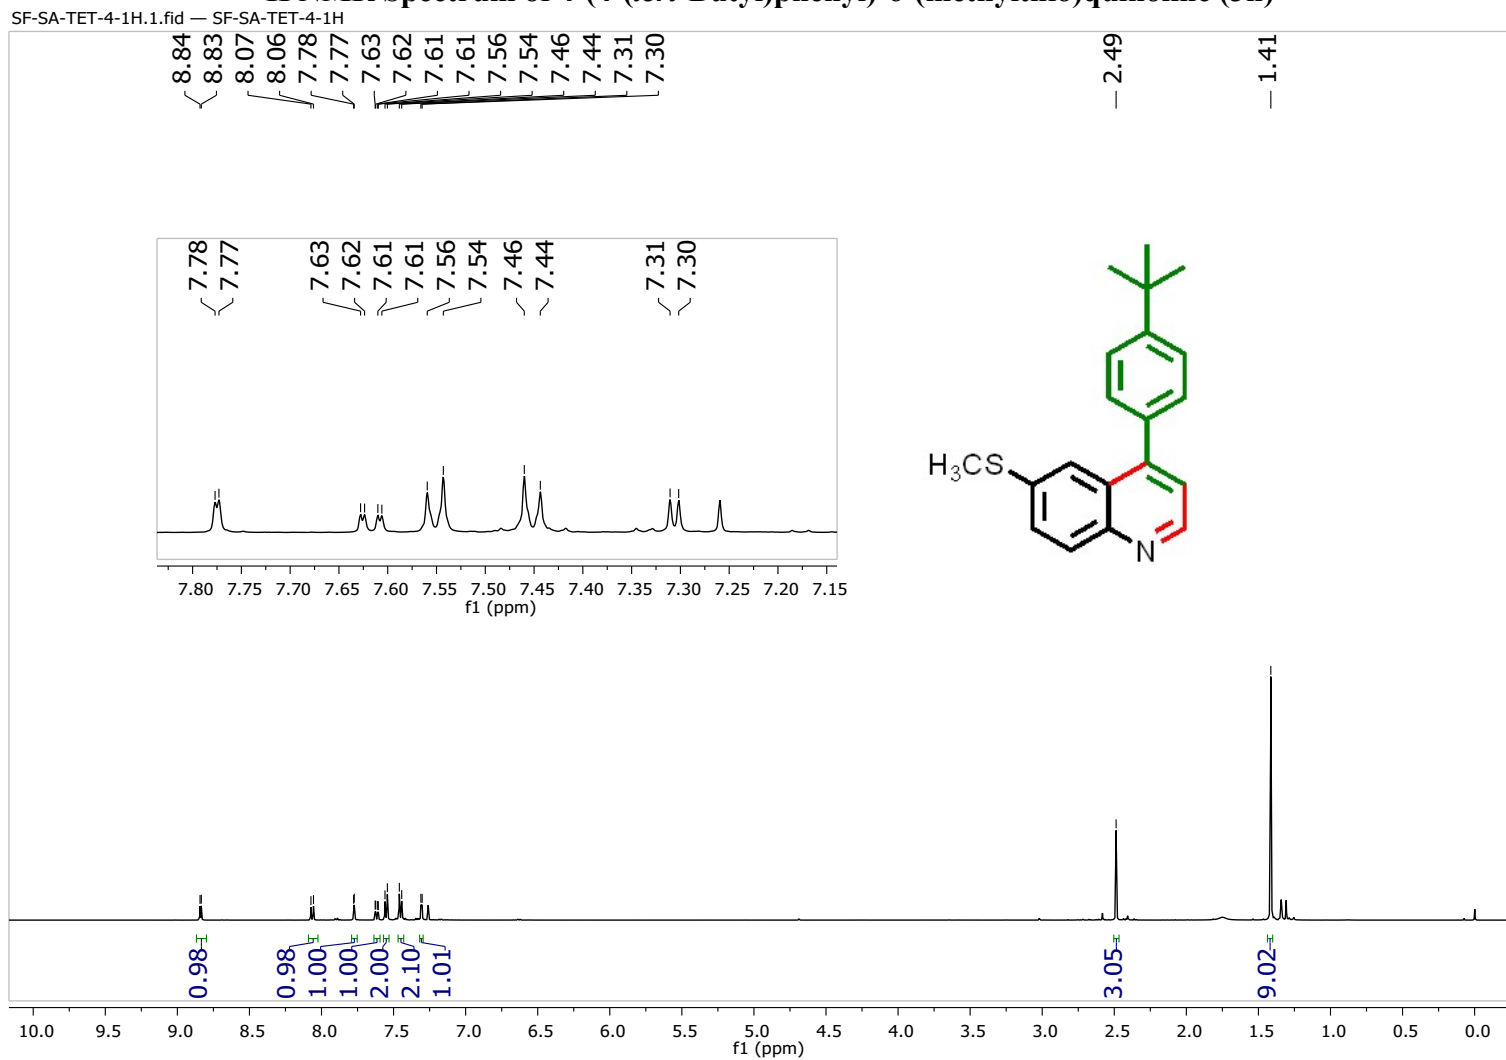

**<sup>13</sup>C NMR Spectrum of 4-(4-(*tert*-Butyl)phenyl)-6-(methylthio)quinoline (3n)**

SF-SA-TET-4-13C.3.fid — SF-SA-TET-4-13C

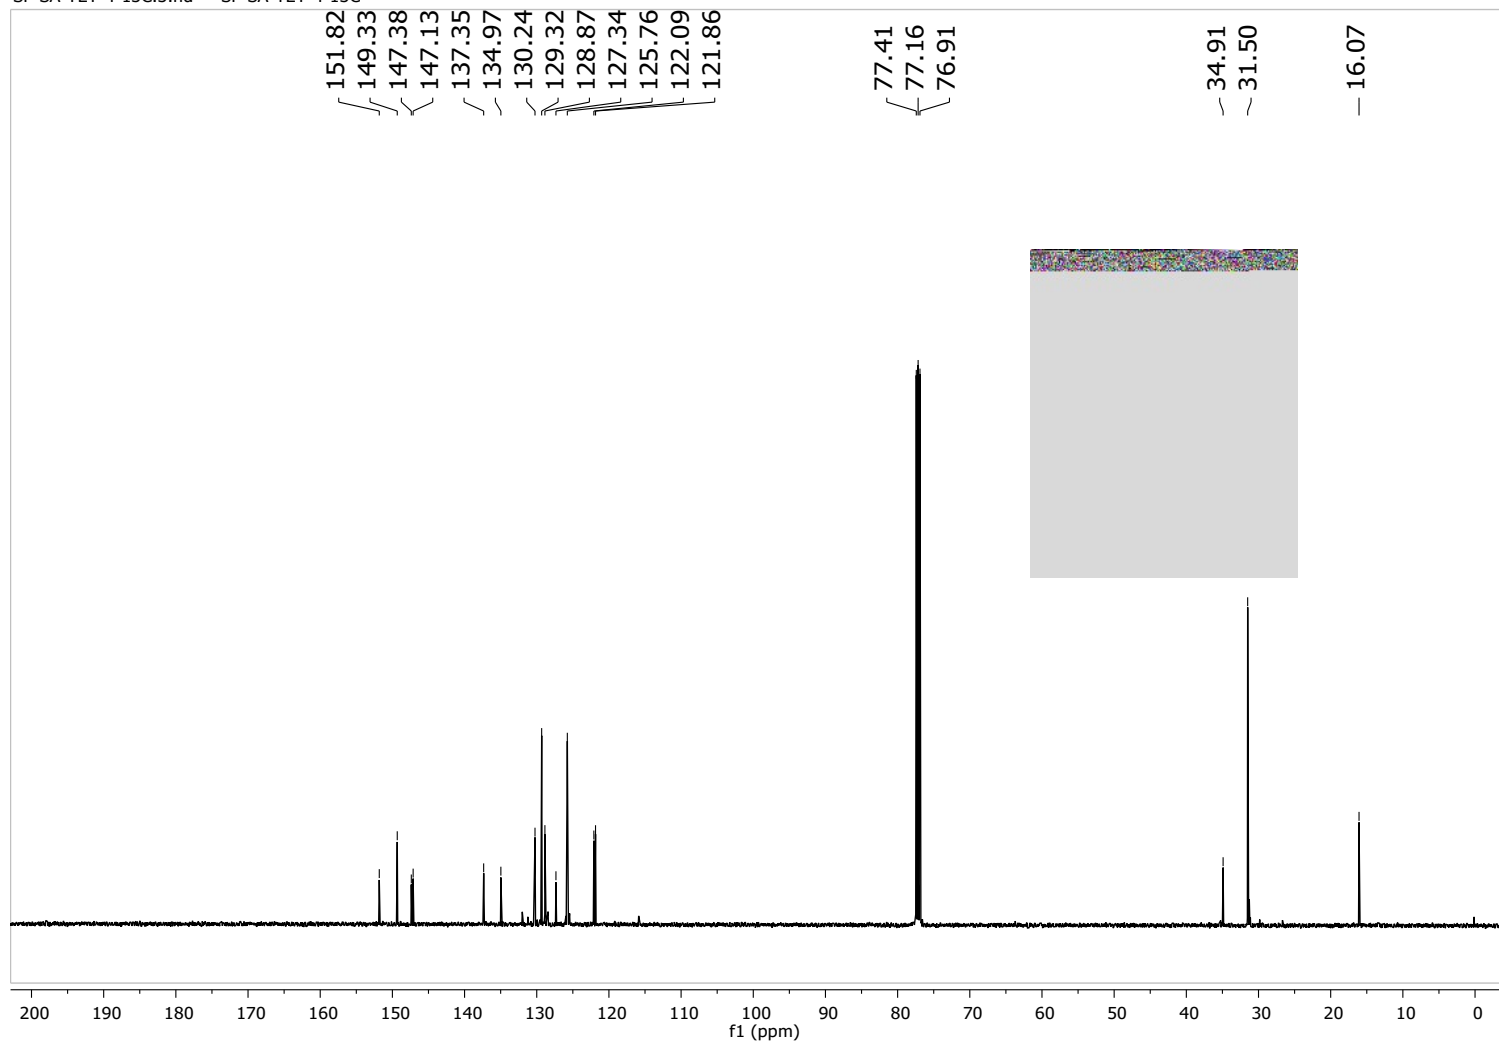

## HRMS Spectrum of 4-(4-(*tert*-Butyl)phenyl)-6-(methylthio)quinoline (3n)

|             |                           |                        |         |                 |                                 |
|-------------|---------------------------|------------------------|---------|-----------------|---------------------------------|
| Sample Name | Sample11                  | Position               | P1-A11  | Instrument Name | QTOF                            |
| User Name   | SYSTEM (SYSTEM)           | Inj Vol                | 5       | InjPosition     |                                 |
| Sample Type | Sample                    | IRM Calibration Status | Success | Data Filename   | ATK_SF_14.d                     |
| ACQ Method  | DIRECT MASS_POSITIVE_01.m | Comment                |         | Acquired Time   | 19-04-2023 15:22:24 (UTC+05:30) |

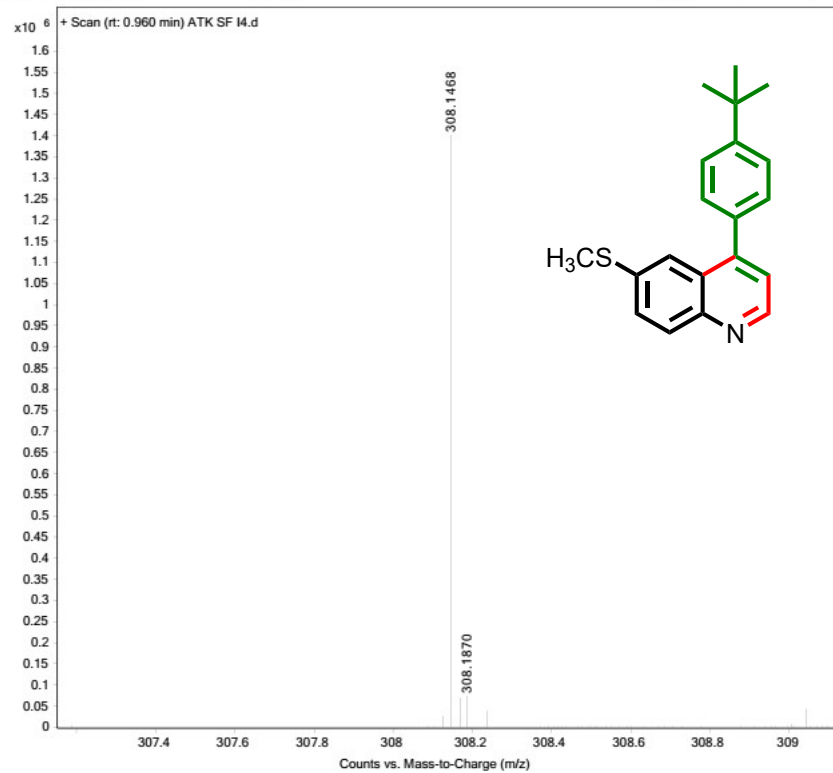

# <sup>1</sup>H NMR Spectrum of 4-Phenylquinoline(3o)

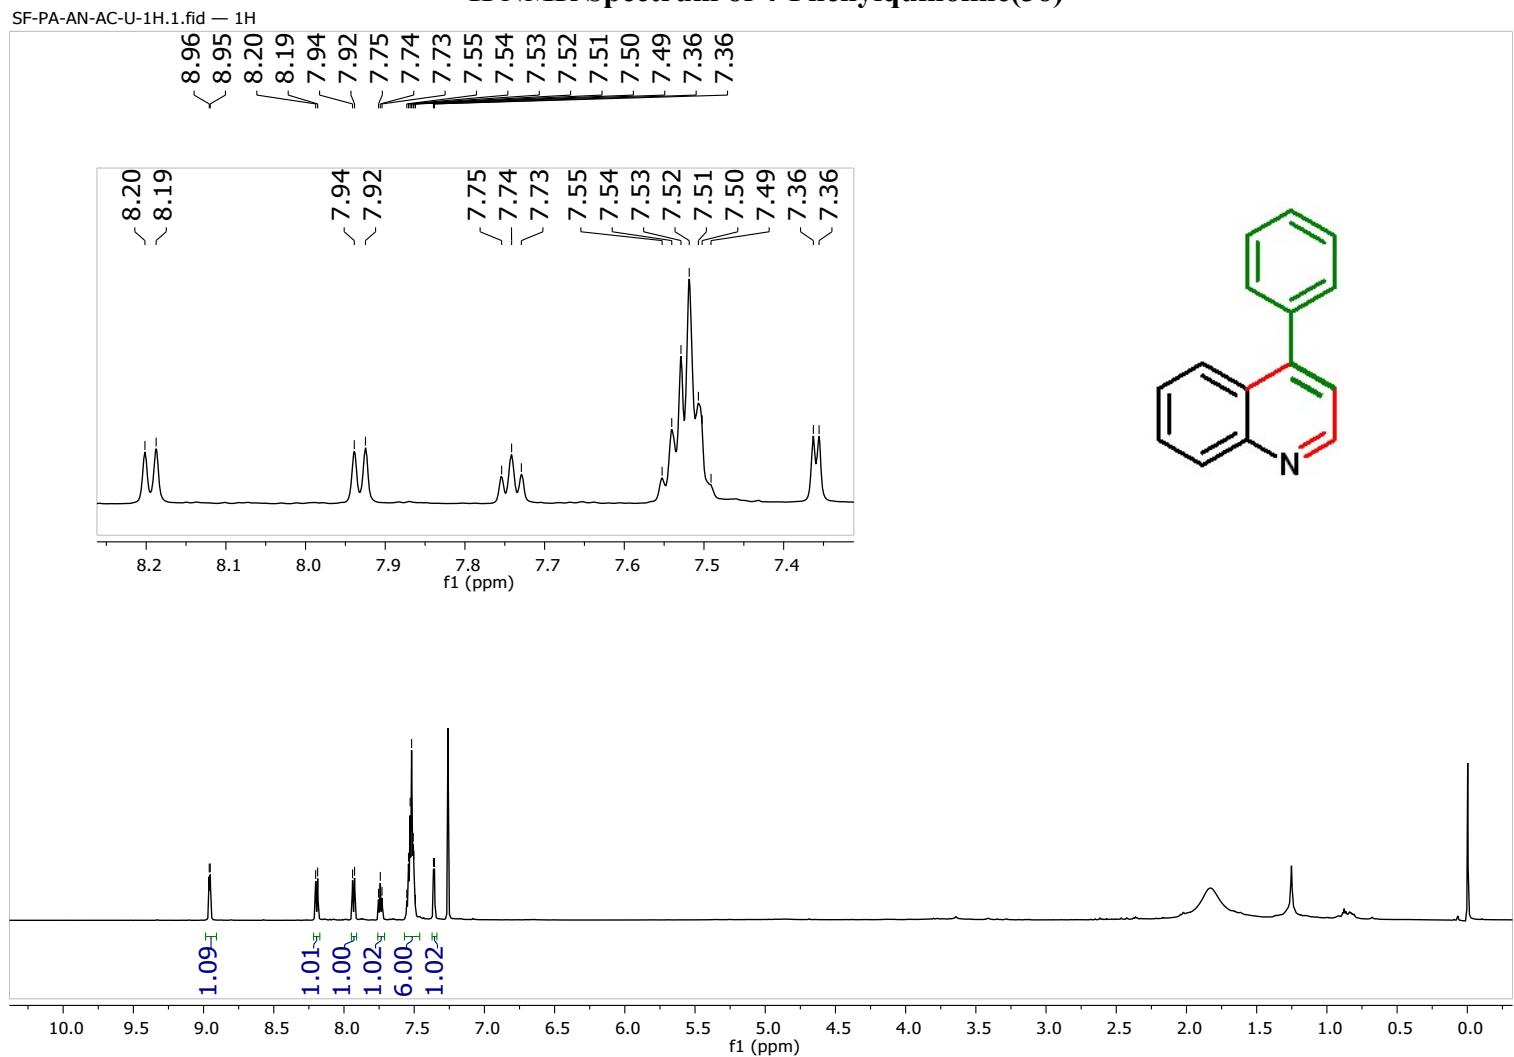

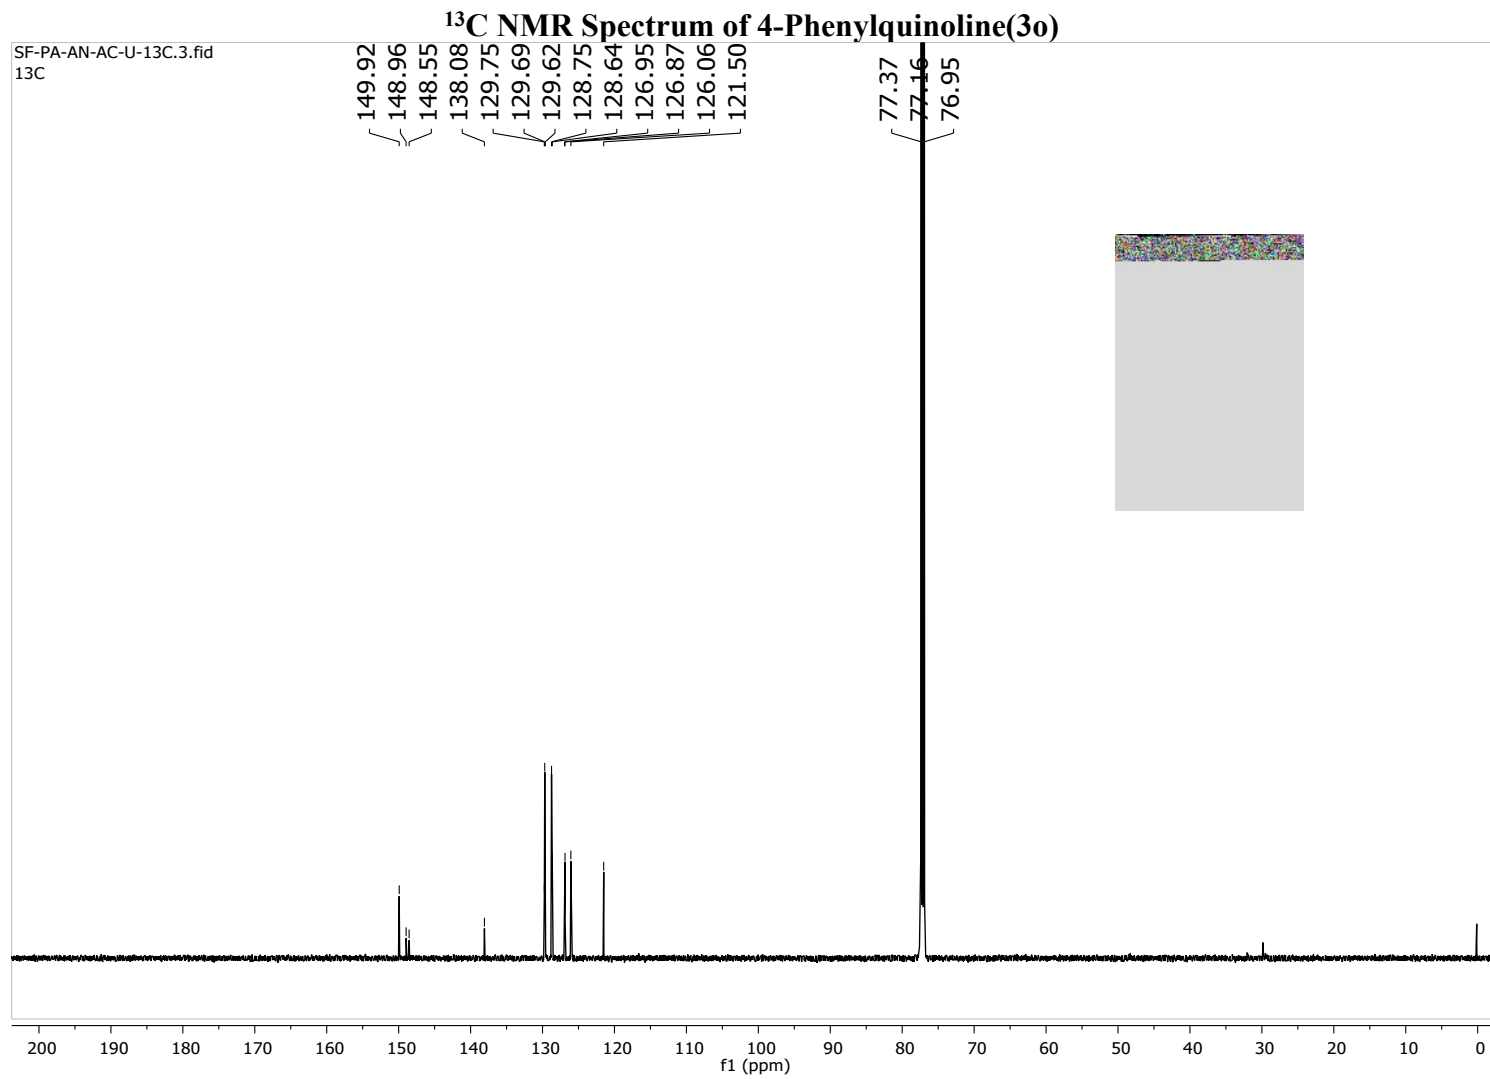

## HRMS Spectrum of 4-Phenylquinoline(3o)

|                    |                           |                               |         |                        |                                 |
|--------------------|---------------------------|-------------------------------|---------|------------------------|---------------------------------|
| <b>Sample Name</b> | Sample10                  | <b>Position</b>               | P1-A10  | <b>Instrument Name</b> | QTOF                            |
| <b>User Name</b>   | SYSTEM (SYSTEM)           | <b>Inj Vol</b>                | 5       | <b>InjPosition</b>     |                                 |
| <b>Sample Type</b> | Sample                    | <b>IRM Calibration Status</b> | Success | <b>Data Filename</b>   | ATK 24CDM 2.d                   |
| <b>ACQ Method</b>  | DIRECT MASS_POSITIVE_01.m | <b>Comment</b>                |         | <b>Acquired Time</b>   | 19-04-2023 15:20:20 (UTC+05:30) |

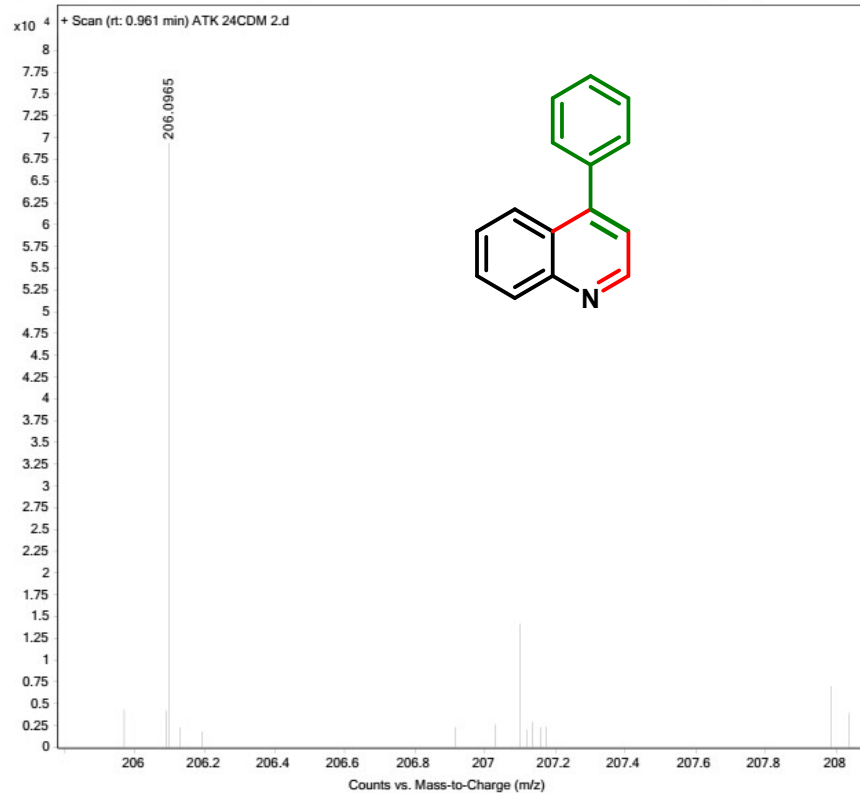



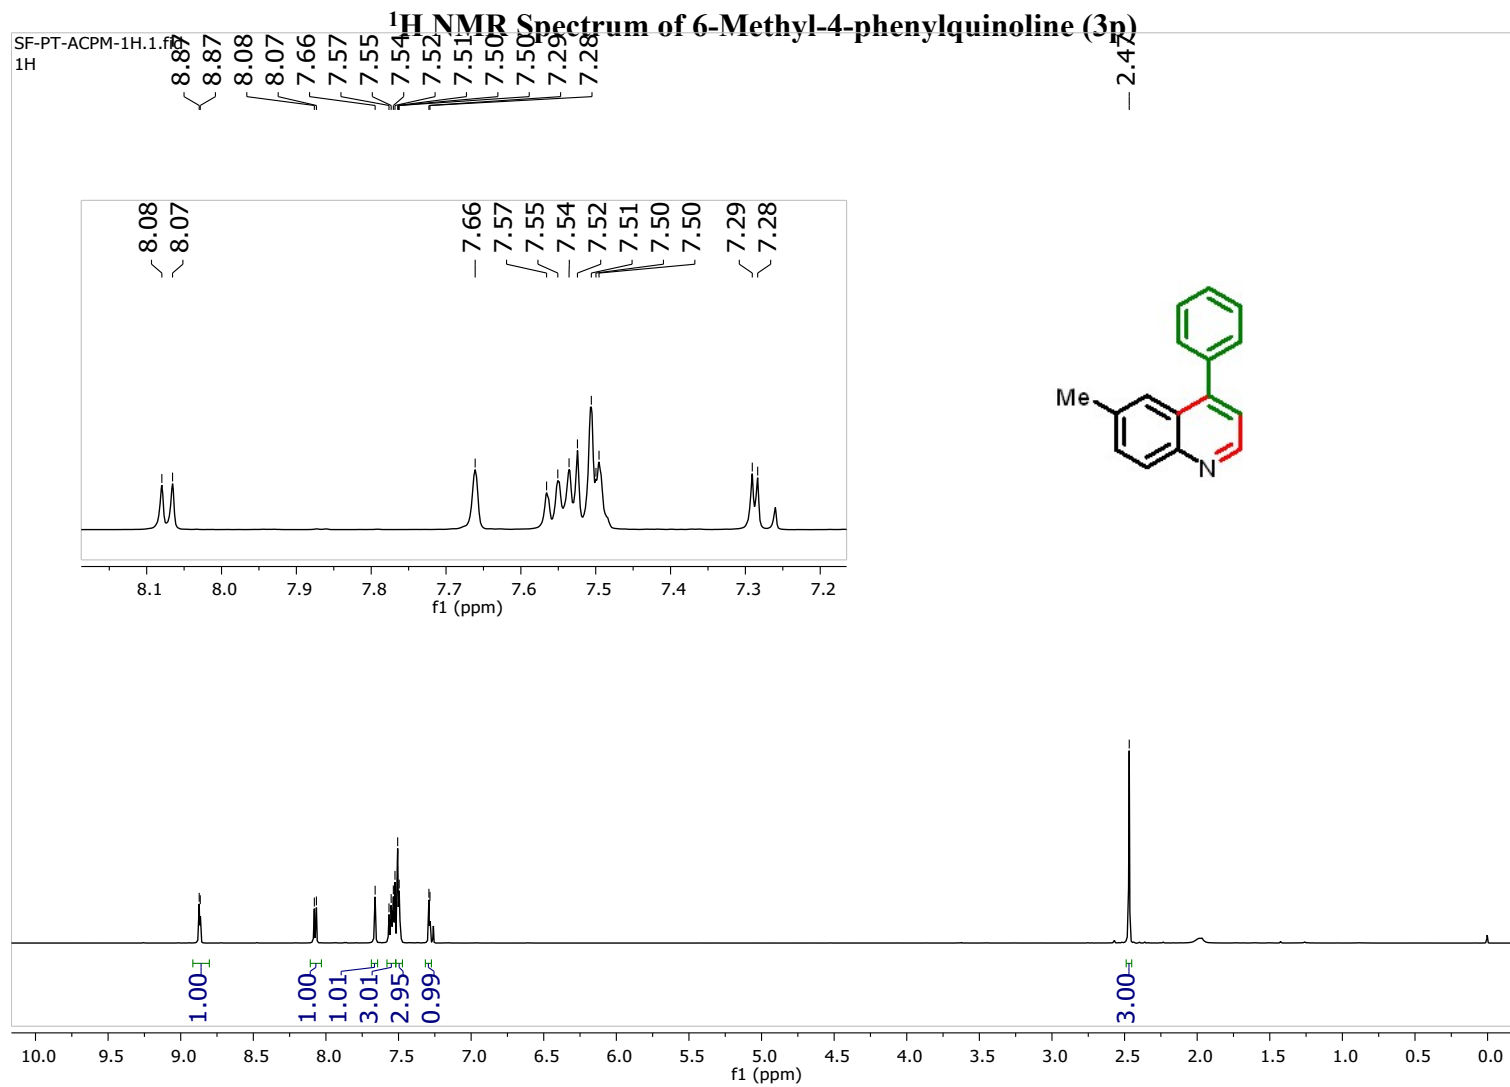

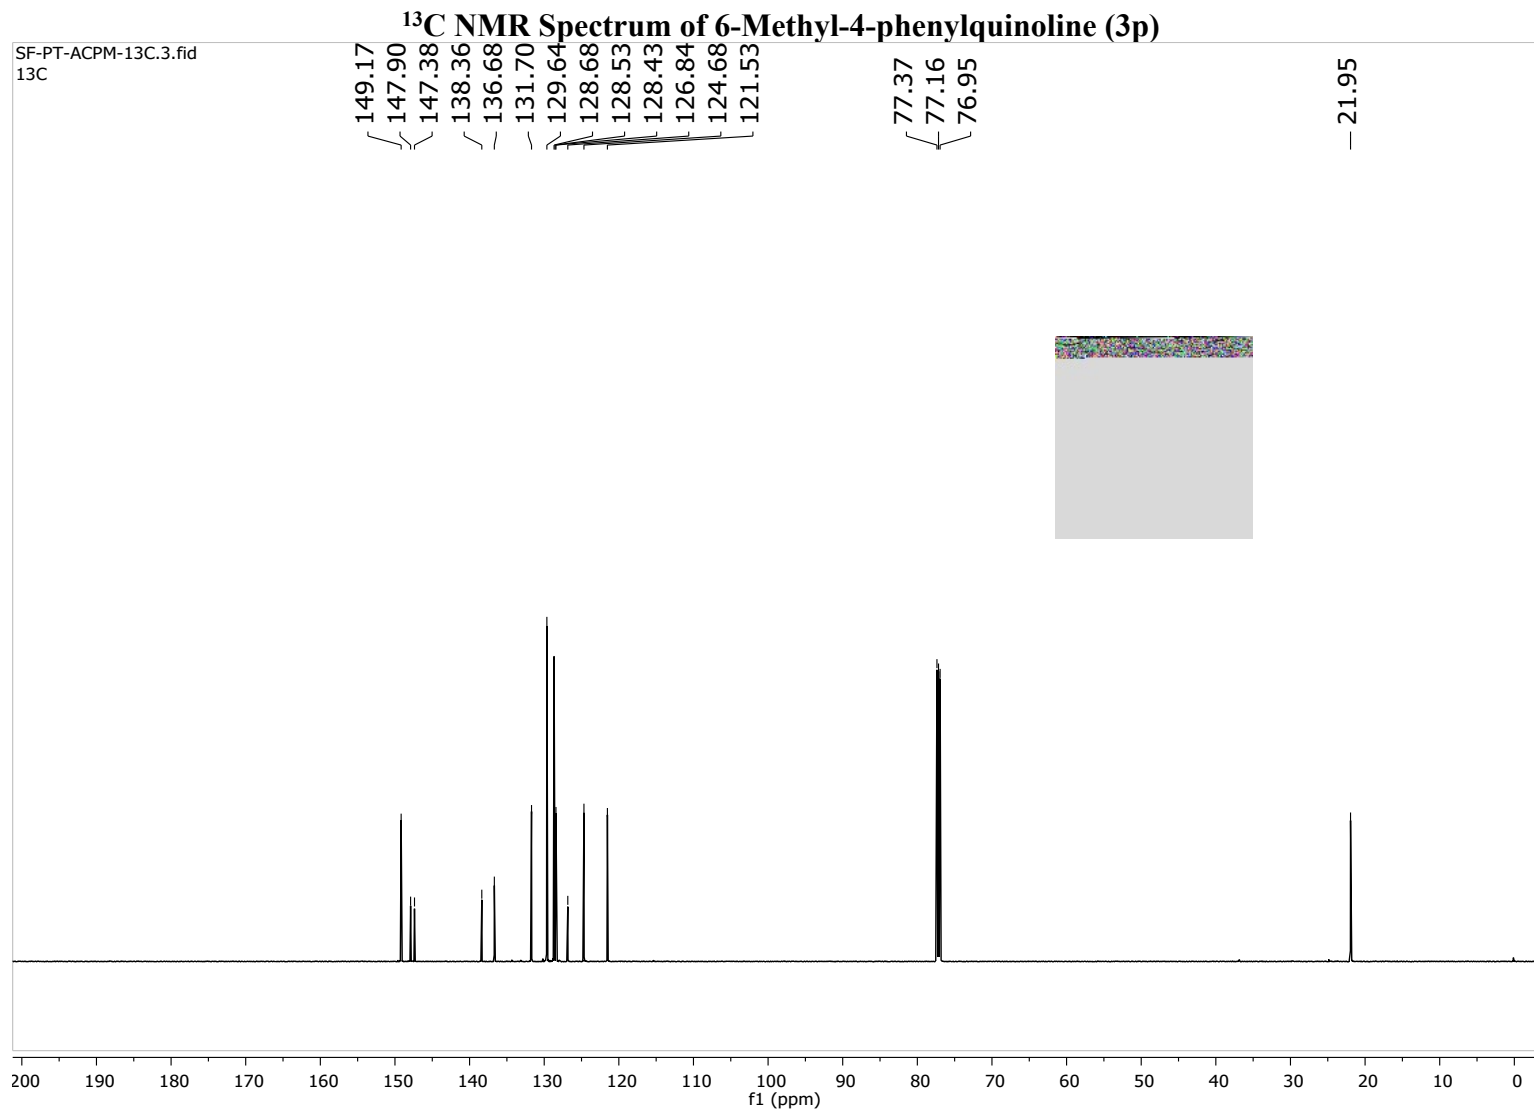

# <sup>1</sup>H-<sup>1</sup>H- COSY Spectrum of 6-Methyl-4-phenylquinoline (3p)

SF-PT-DM-4-2\_COSY.17.ser — SF-PT-DM-4-2\_COSY

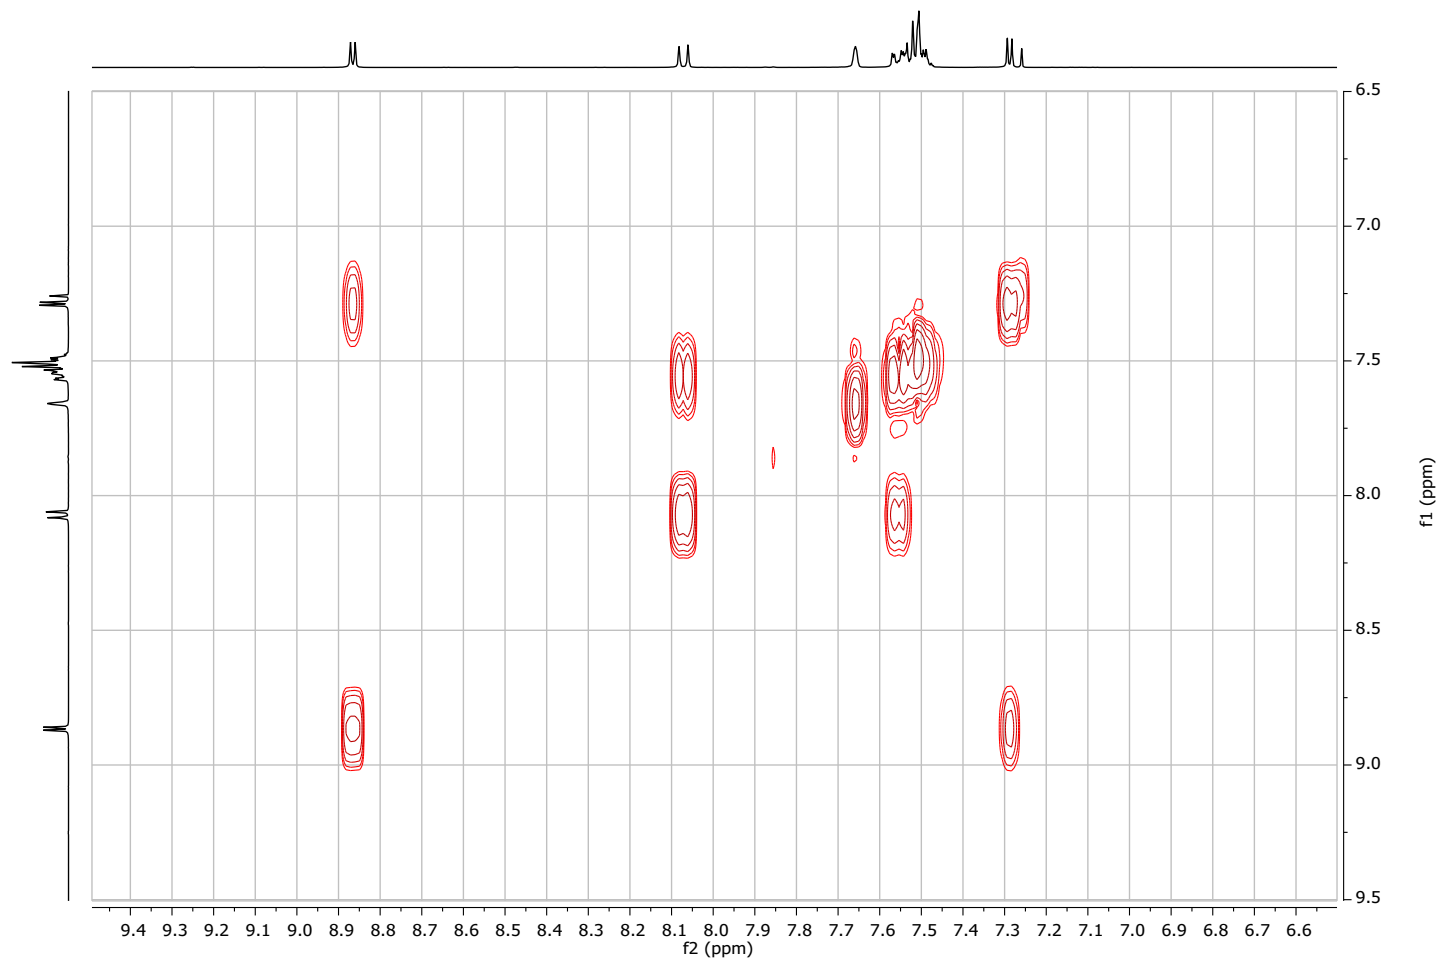

# $^1\text{H}$ - $^{13}\text{C}$ - COSY Spectrum of 6-Methyl-4-phenylquinoline (3p)

SF-PT-DM-4-2\_HSQC.15.ser — SF-PT-DM-4-2\_HSQC

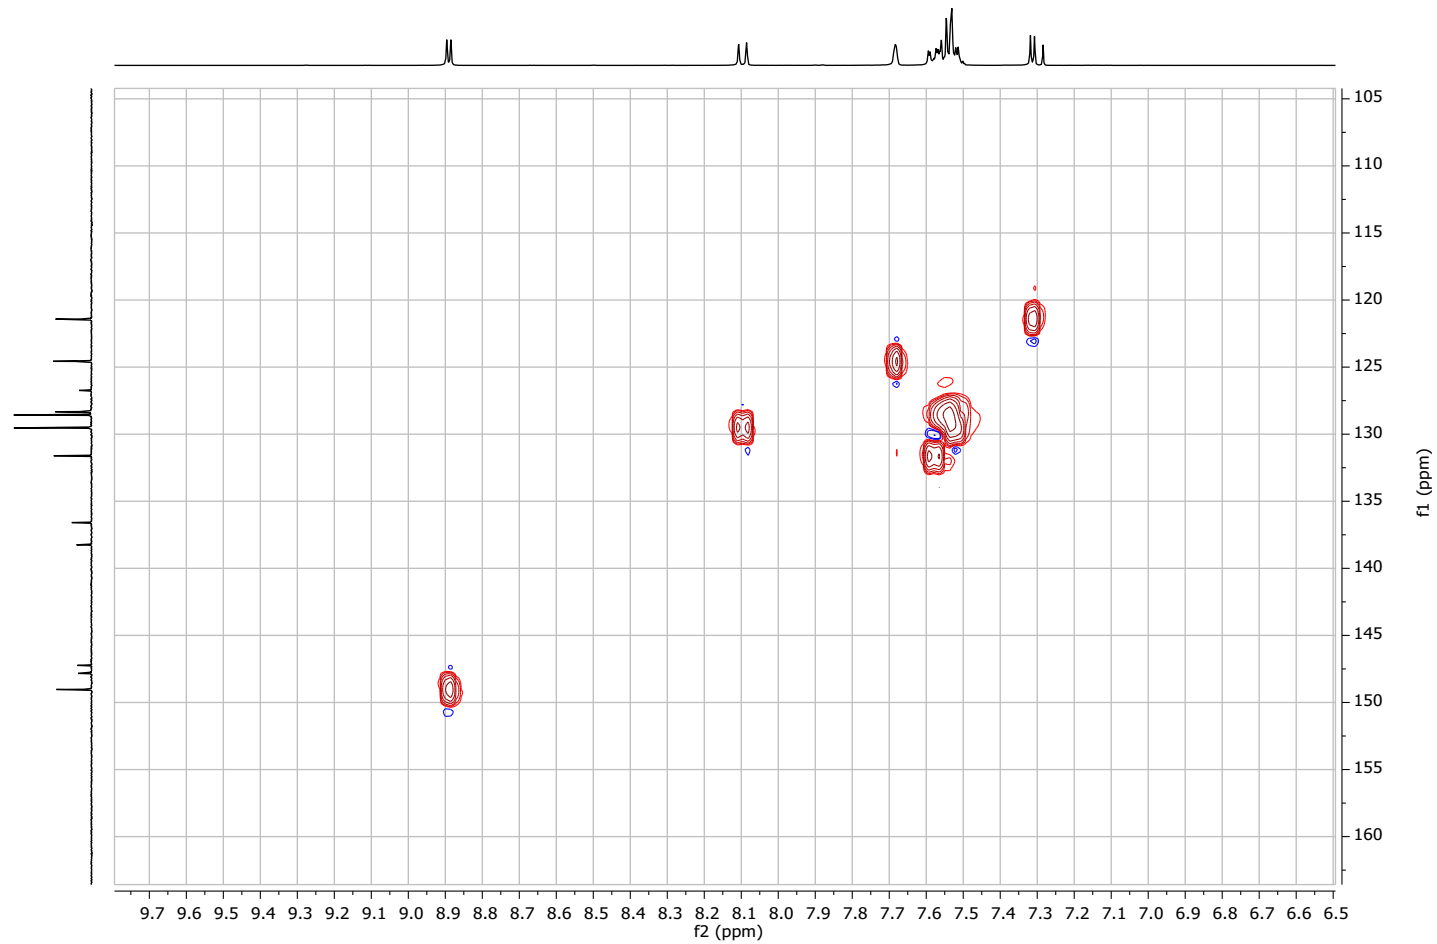

## HRMS Spectrum of 6-Methyl-4-phenylquinoline (3p)

|             |                             |                        |         |                 |                                 |
|-------------|-----------------------------|------------------------|---------|-----------------|---------------------------------|
| Sample Name | Sample18                    | Position               | P1-B7   | Instrument Name | QTOF                            |
| User Name   | SYSTEM (SYSTEM)             | Inj Vol                | 5       | InjPosition     |                                 |
| Sample Type | Sample                      | IRM Calibration Status | Success | Data Filename   | SF-403.d                        |
| ACQ Method  | DIRECT MASS_POSITIVE_01_1.m | Comment                |         | Acquired Time   | 02-05-2023 11:04:37 (UTC+05:30) |

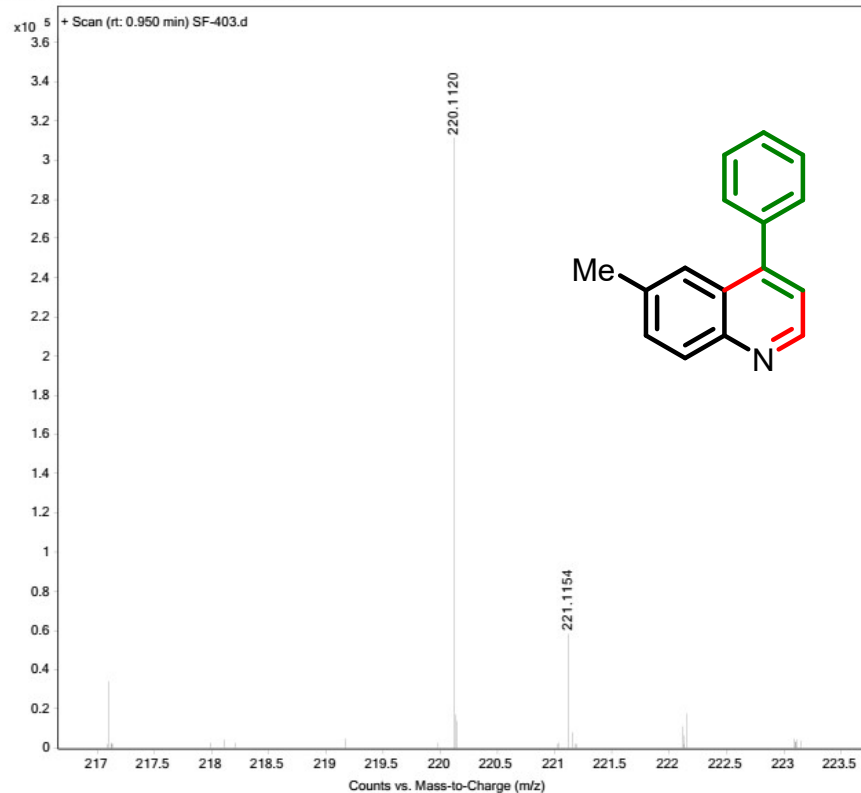

### <sup>1</sup>H NMR Spectrum of 7-Methoxy-4-phenylquinoline (3q)

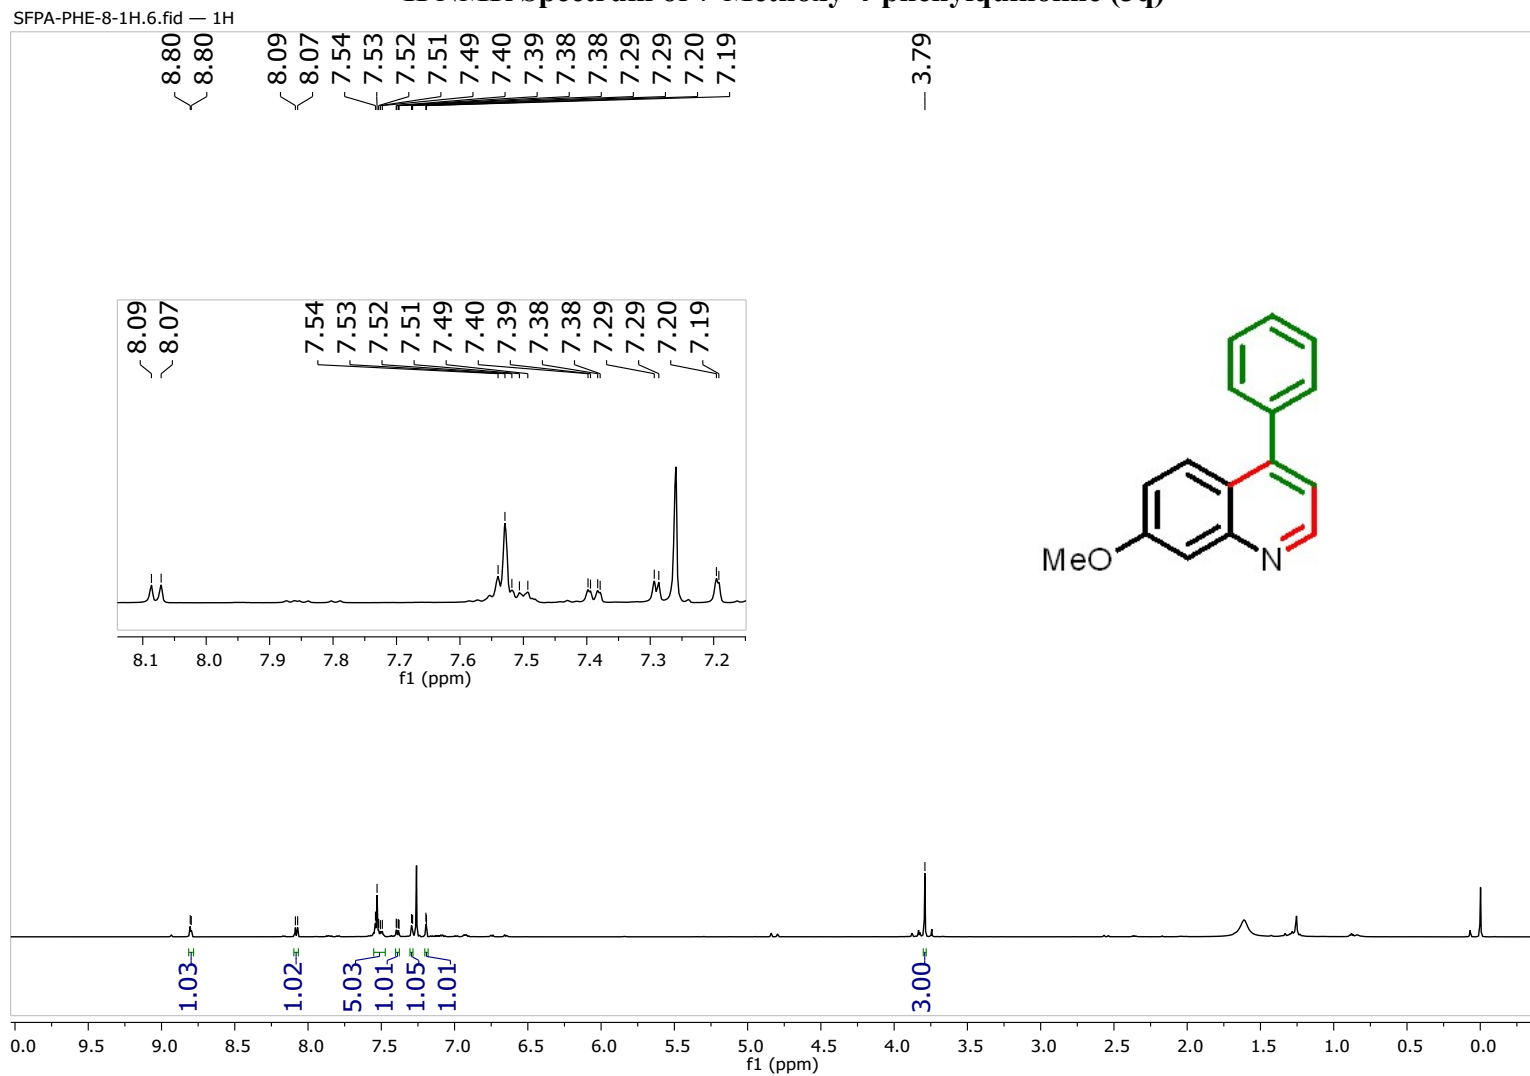

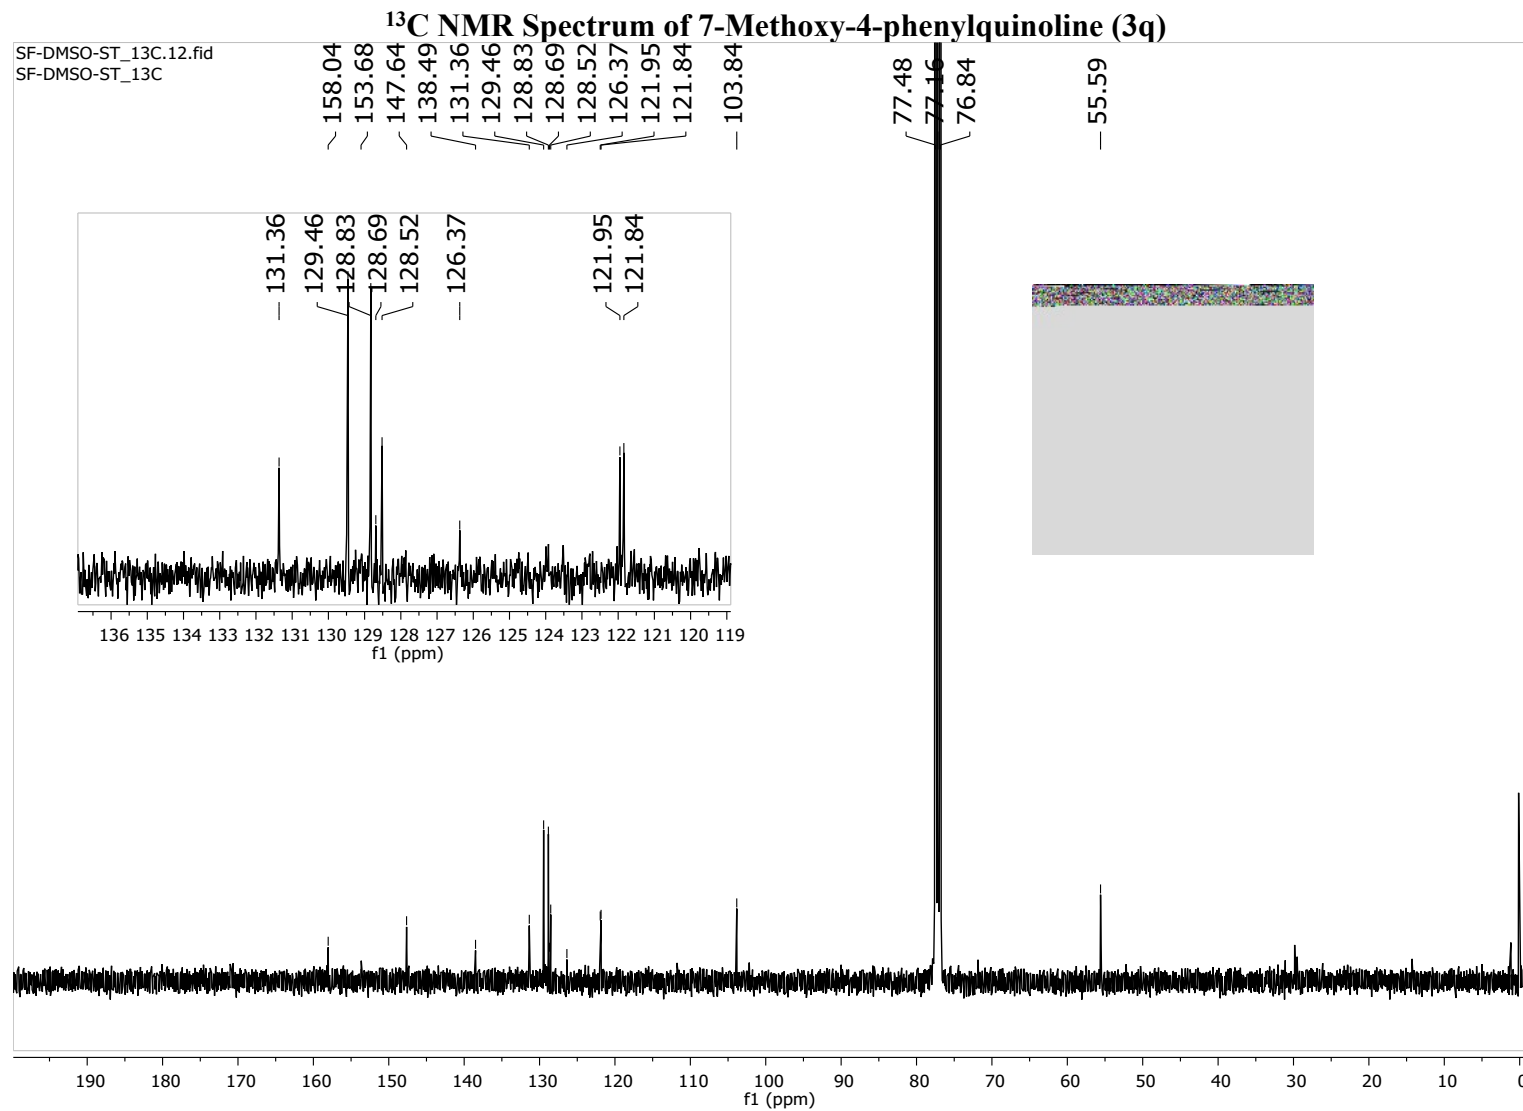

## HRMS Spectrum of 7-Methoxy-4-phenylquinoline (3q)

|                    |                           |                               |         |                        |                                 |
|--------------------|---------------------------|-------------------------------|---------|------------------------|---------------------------------|
| <b>Sample Name</b> | Sample13                  | <b>Position</b>               | P1-B2   | <b>Instrument Name</b> | QTOF                            |
| <b>User Name</b>   | SYSTEM (SYSTEM)           | <b>Inj Vol</b>                | 5       | <b>InjPosition</b>     |                                 |
| <b>Sample Type</b> | Sample                    | <b>IRM Calibration Status</b> | Success | <b>Data Filename</b>   | SFRJ21.d                        |
| <b>ACQ Method</b>  | DIRECT MASS_POSITIVE_01.m | <b>Comment</b>                |         | <b>Acquired Time</b>   | 06-04-2023 16:23:46 (UTC+05:30) |

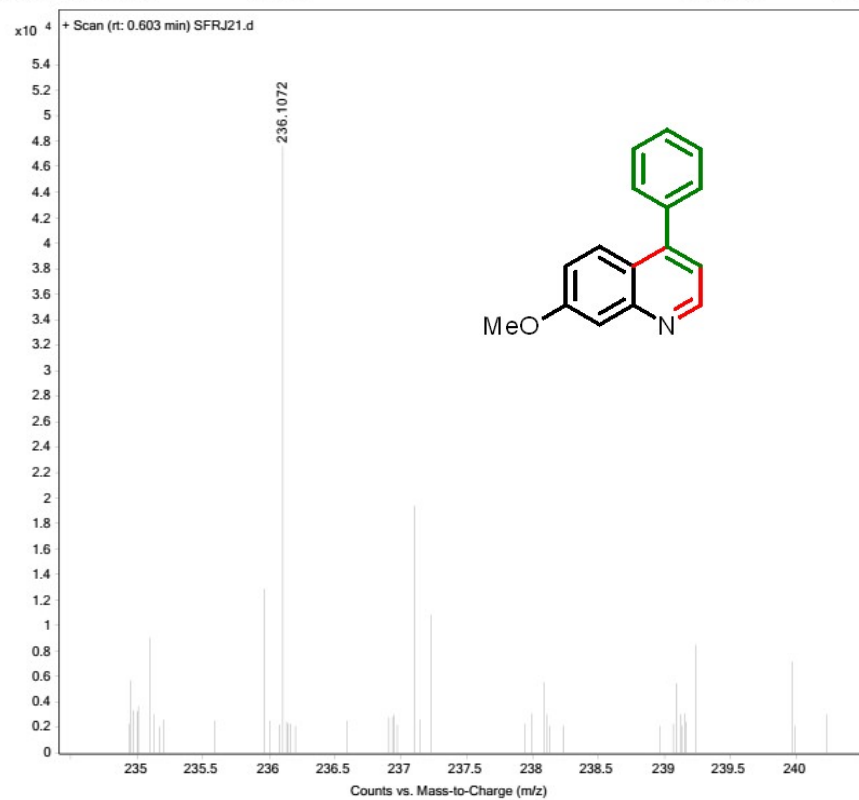



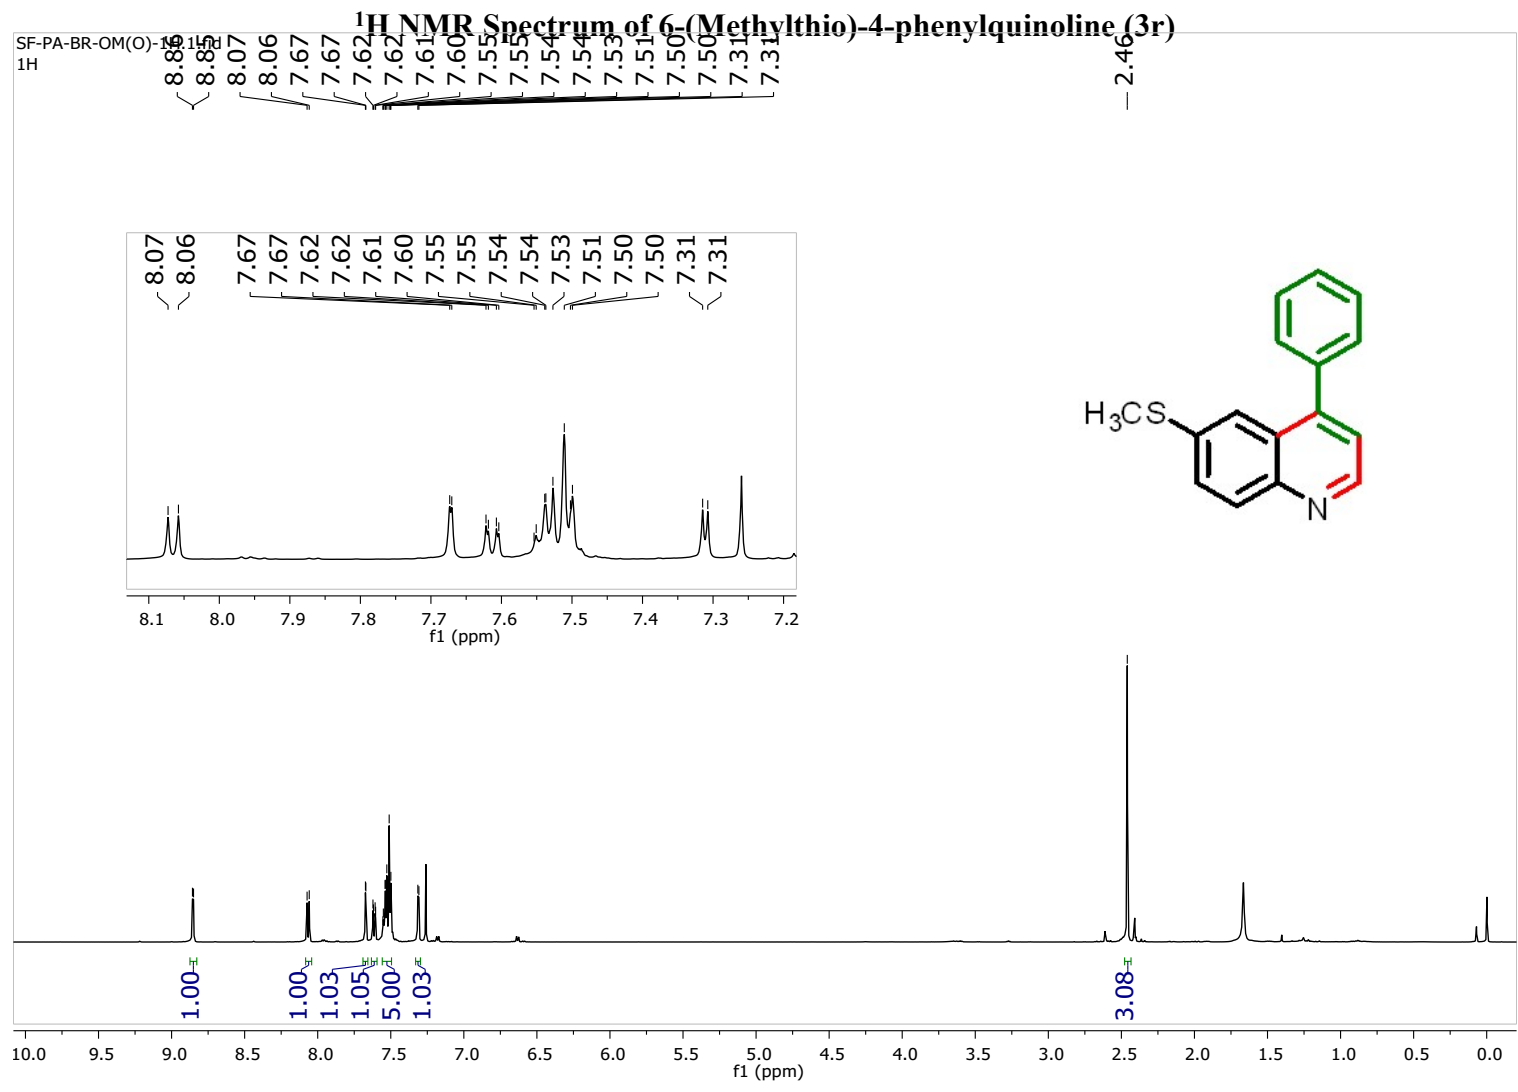

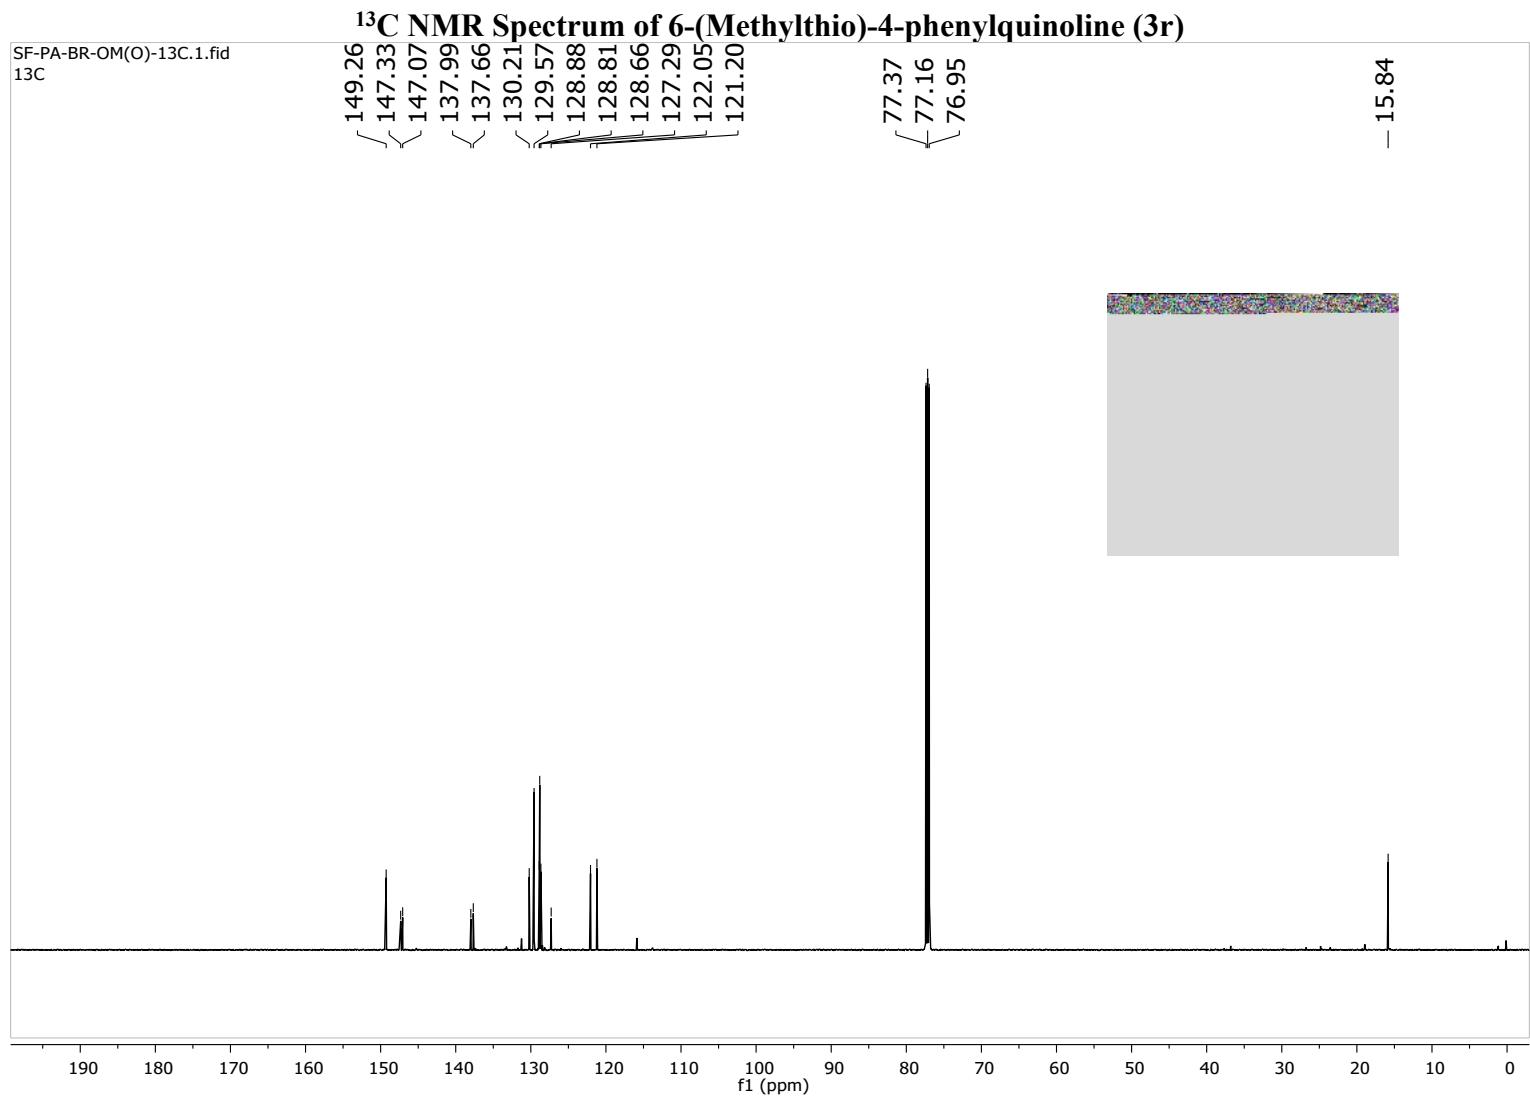

## HRMS Spectrum of 6-(Methylthio)-4-phenylquinoline (3r)

|             |                             |                        |         |                 |                                 |
|-------------|-----------------------------|------------------------|---------|-----------------|---------------------------------|
| Sample Name | Sample20                    | Position               | P1-B8   | Instrument Name | QTOF                            |
| User Name   | SYSTEM (SYSTEM)             | Inj Vol                | 5       | InjPosition     |                                 |
| Sample Type | Sample                      | IRM Calibration Status | Success | Data Filename   | SF 02.d                         |
| ACQ Method  | DIRECT MASS_POSITIVE_01_1.m | Comment                |         | Acquired Time   | 22-05-2023 10:48:01 (UTC+05:30) |

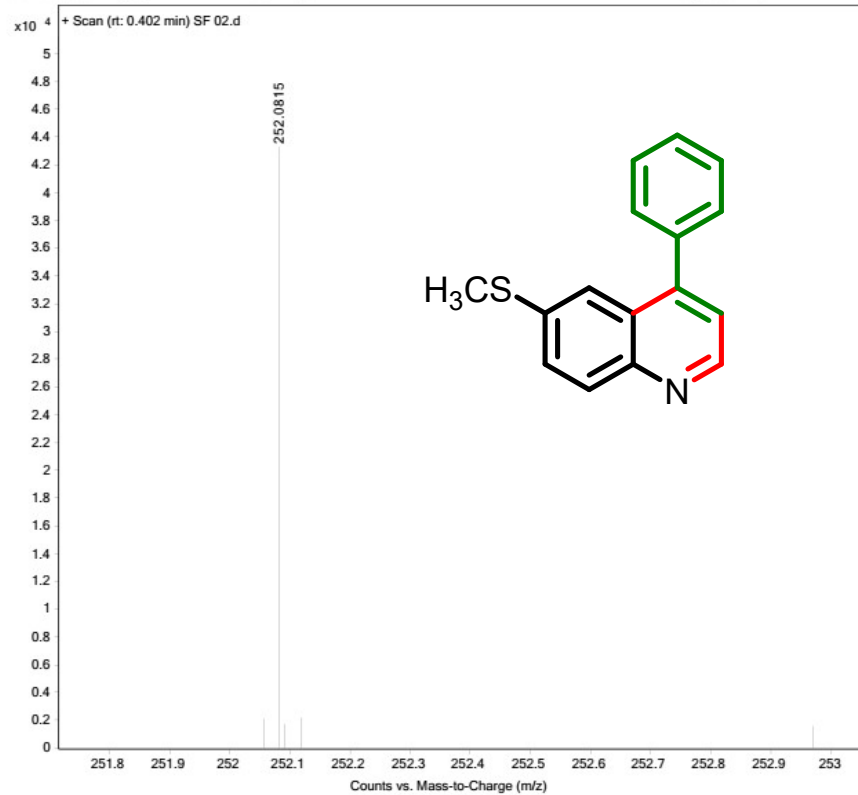

# <sup>1</sup>H NMR Spectrum of 6,7-Dimethyl-4-phenylquinoline (3s)

SF-3-4-PA-5L-1H.1.fid — 1H

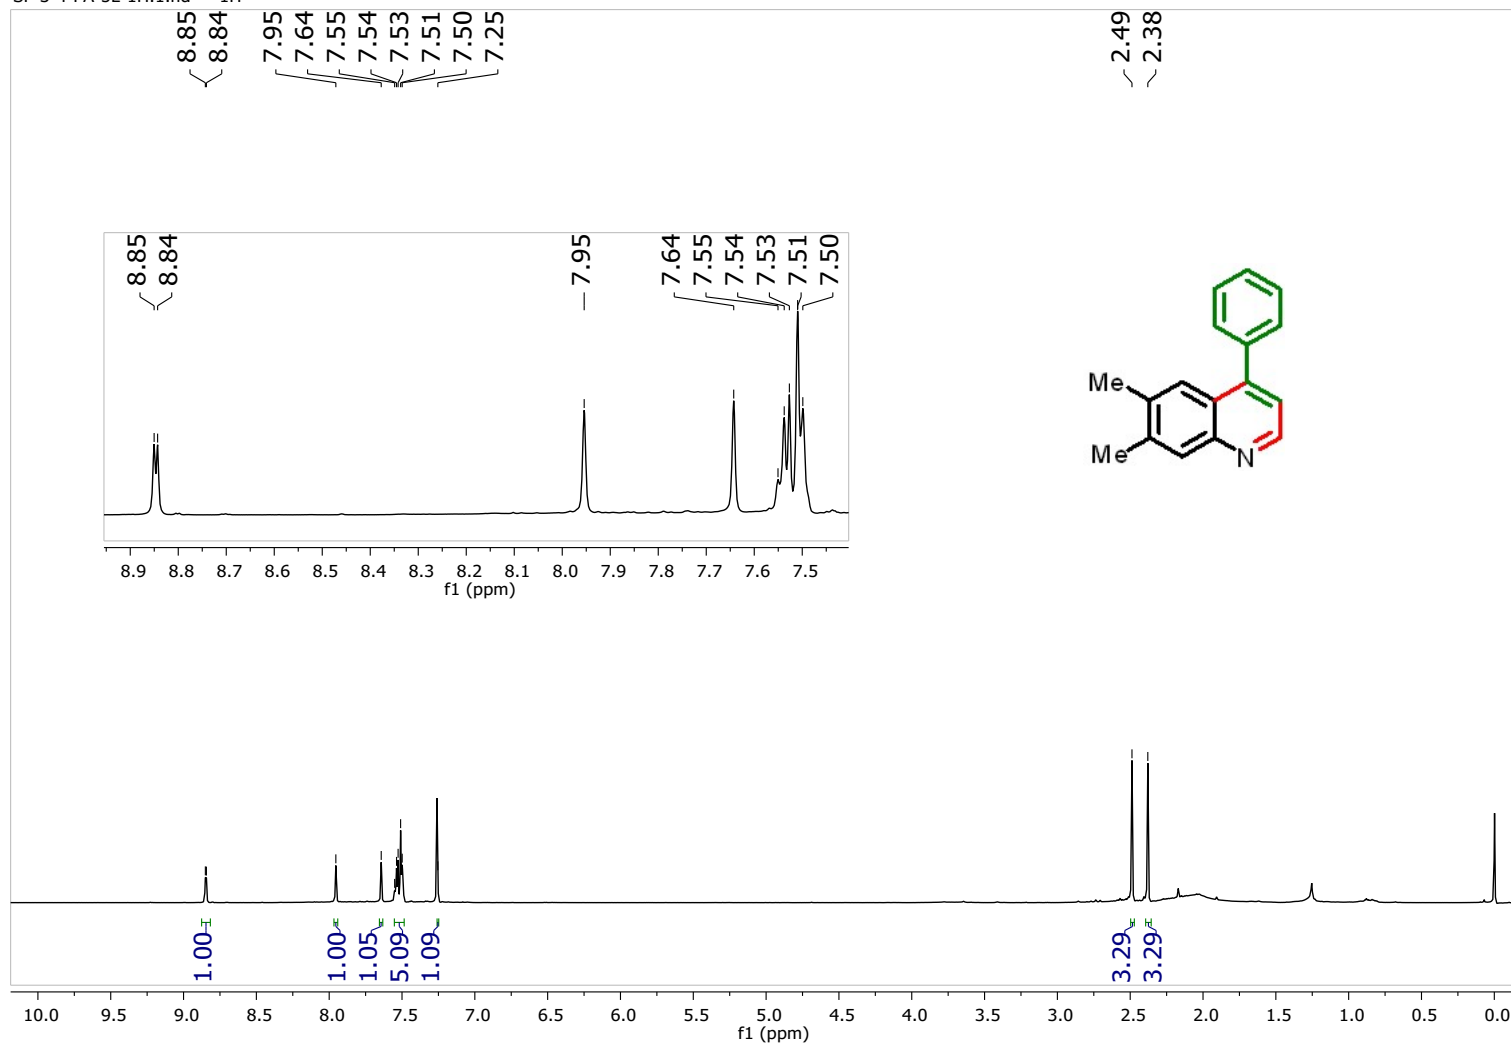

### <sup>13</sup>C NMR Spectrum of 6,7-Dimethyl-4-phenylquinoline (3s)

SF-3,4-PA-5L-13C.1.fid — 13C

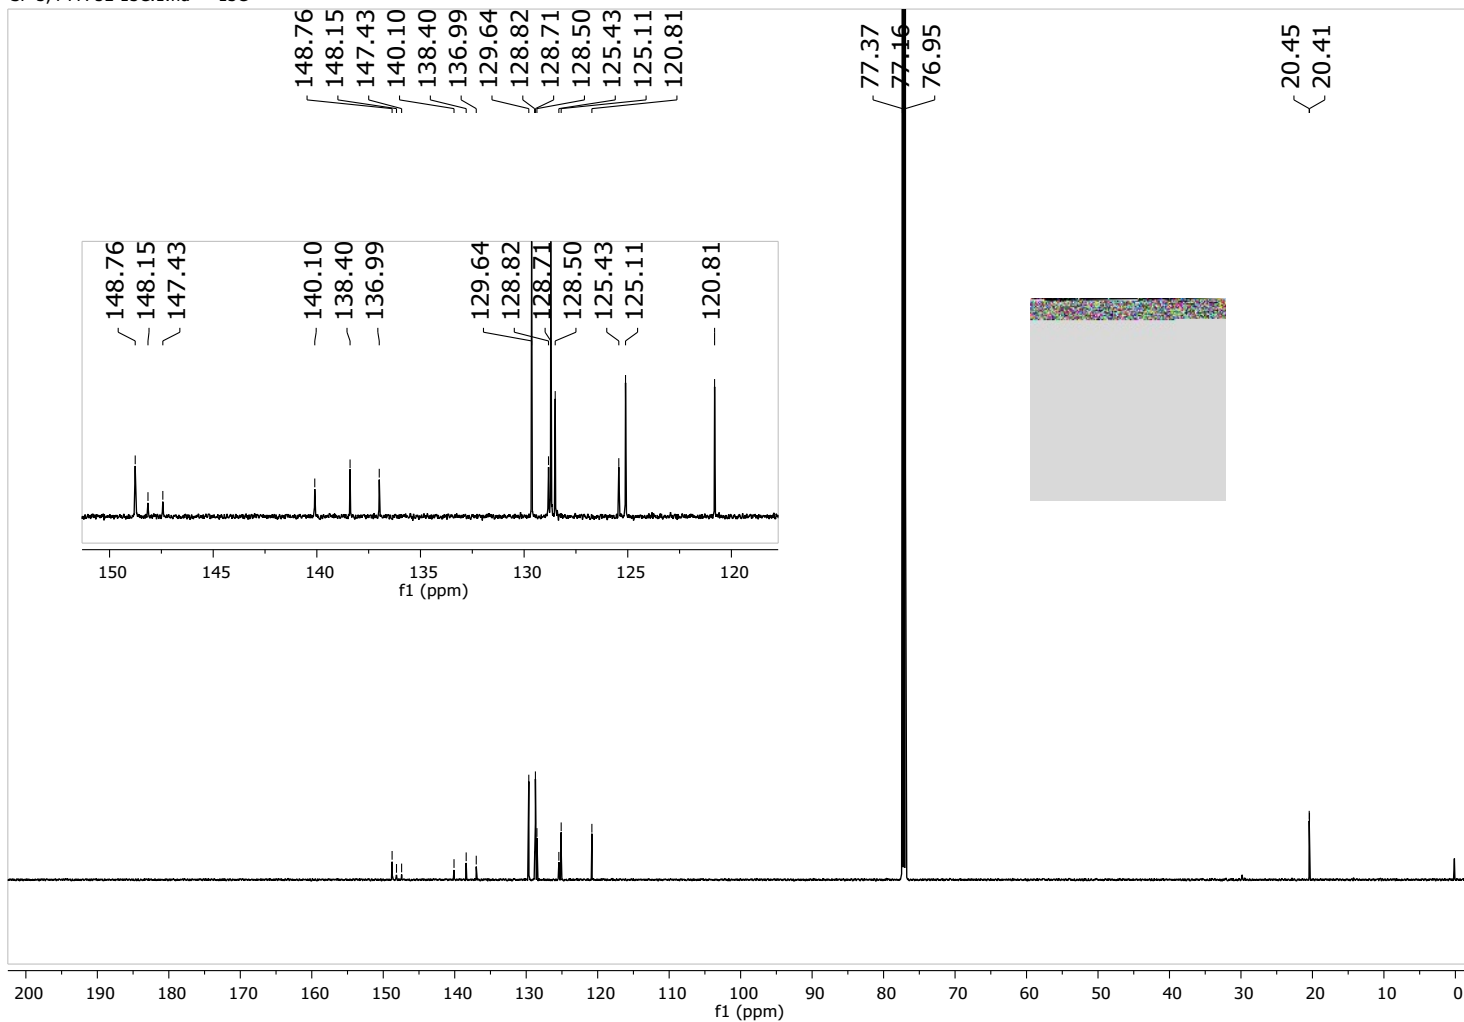

## HRMS Spectrum of 6,7-Dimethyl-4-phenylquinoline (3s)

|                    |                             |                               |         |                        |                                 |
|--------------------|-----------------------------|-------------------------------|---------|------------------------|---------------------------------|
| <b>Sample Name</b> | Sample10                    | <b>Position</b>               | P1-A9   | <b>Instrument Name</b> | QTOF                            |
| <b>User Name</b>   | SYSTEM (SYSTEM)             | <b>Inj Vol</b>                | 5       | <b>InjPosition</b>     |                                 |
| <b>Sample Type</b> | Sample                      | <b>IRM Calibration Status</b> | Success | <b>Data Filename</b>   | SF-308.d                        |
| <b>ACQ Method</b>  | DIRECT MASS_POSITIVE_D1_1.m | <b>Comment</b>                |         | <b>Acquired Time</b>   | 26-04-2023 11:34:06 (UTC+05:30) |

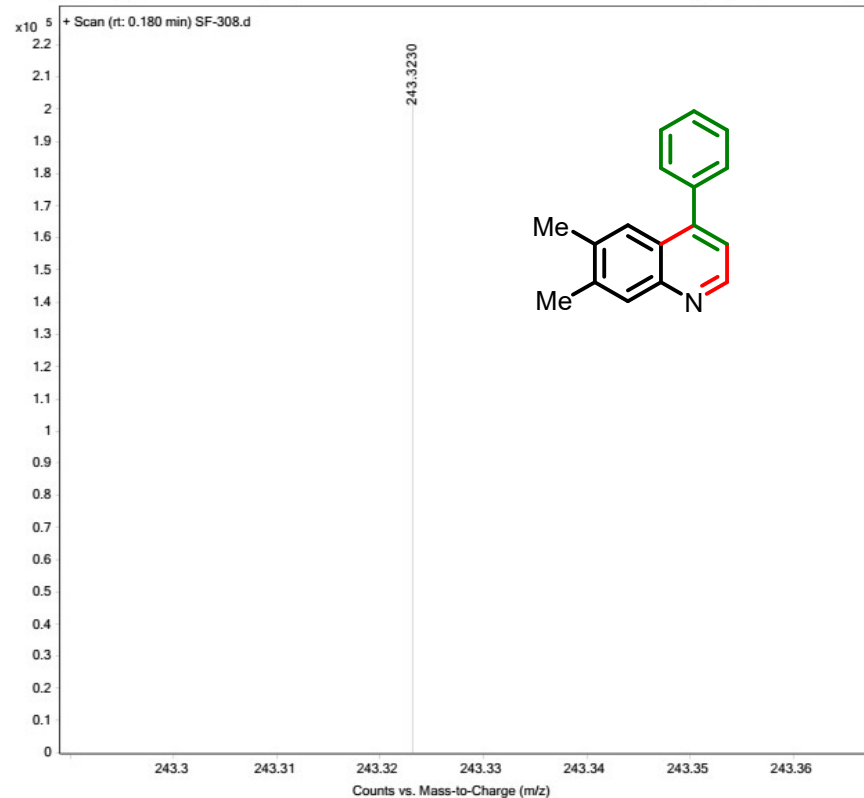

# <sup>1</sup>H NMR Spectrum of 4-Phenylbenzo[*h*]quinoline(3t)

SF-NAI-4-PM-1H.7.fid — 1H

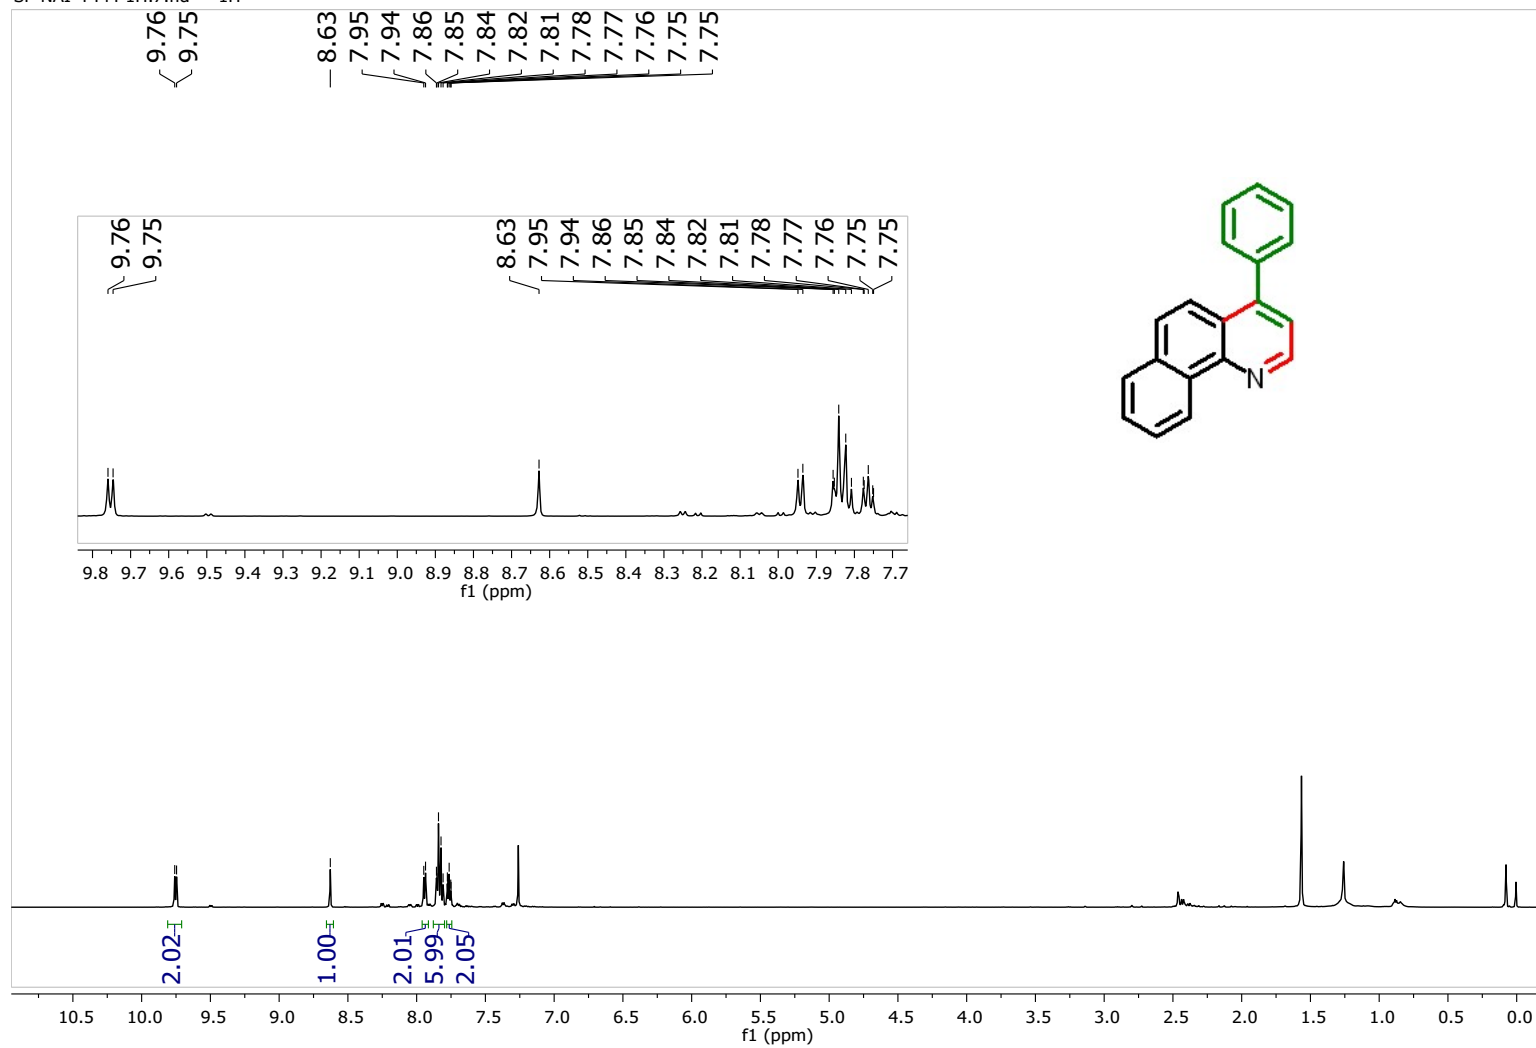

**<sup>13</sup>C NMR Spectrum of 4-Phenylbenzo[*h*]quinoline(3t)**

SF-NAI-4-PM-13C.8.fid — 13C

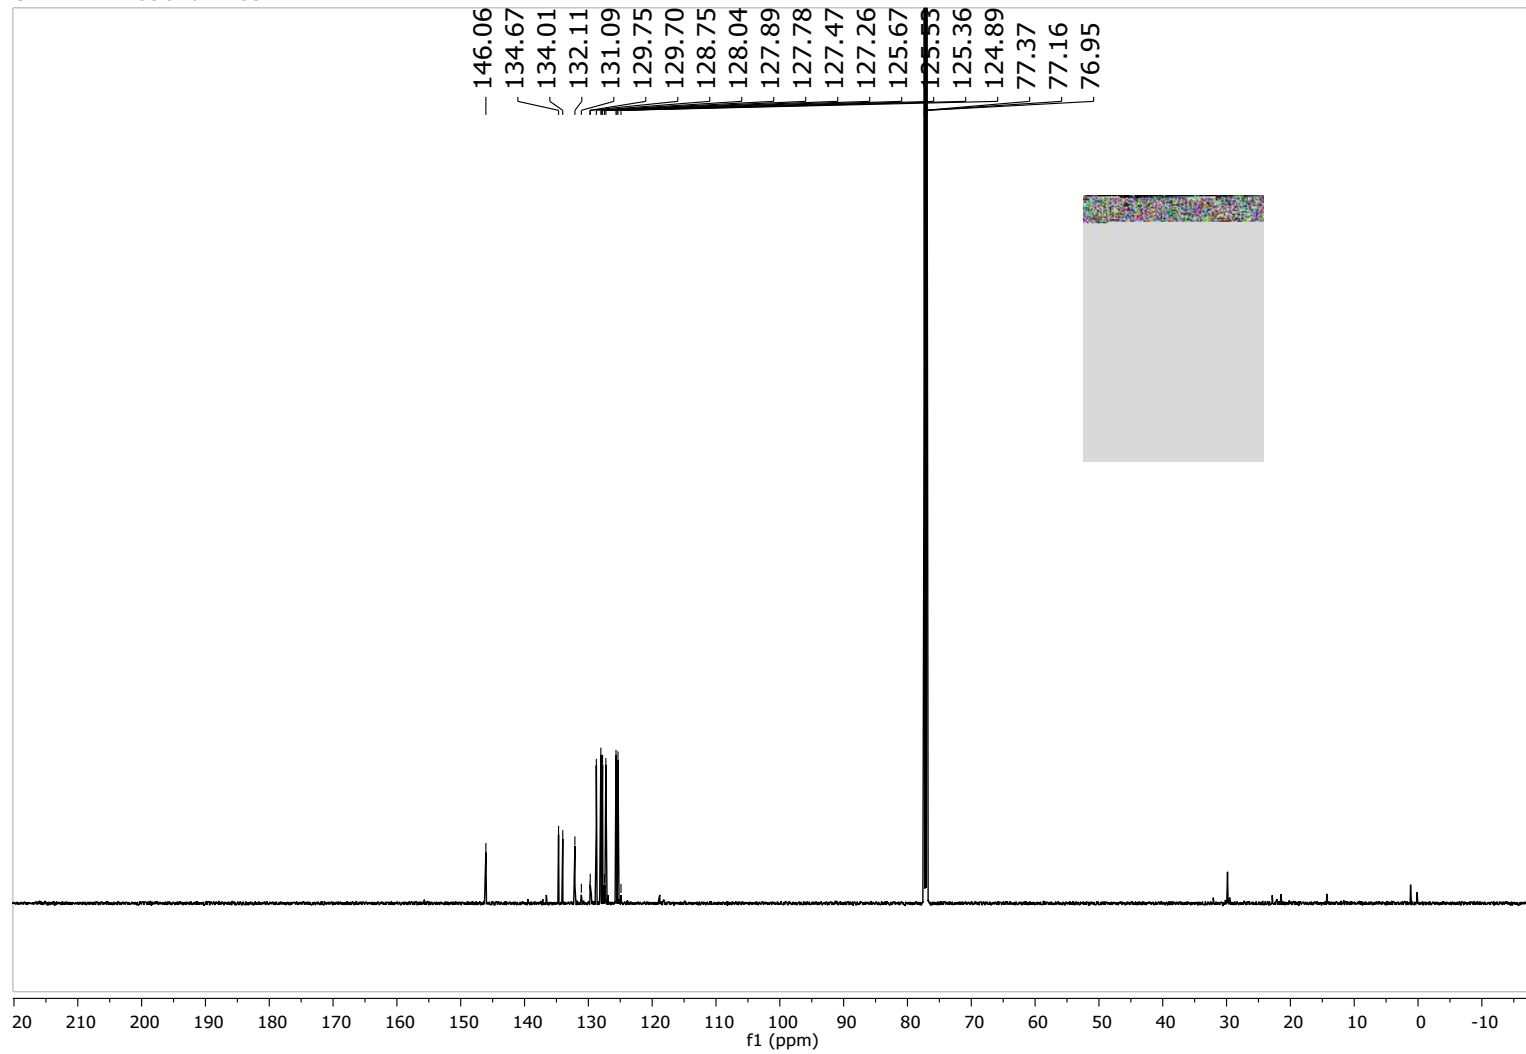



# HRMS Spectrum of 4-Phenylbenzo[h]quinoline(3t)

|                    |                             |                               |         |                        |                                 |
|--------------------|-----------------------------|-------------------------------|---------|------------------------|---------------------------------|
| <b>Sample Name</b> | Sample92                    | <b>Position</b>               | P1-E2   | <b>Instrument Name</b> | QTOF                            |
| <b>User Name</b>   | SYSTEM (SYSTEM)             | <b>Inj Vol</b>                | 5       | <b>InjPosition</b>     |                                 |
| <b>Sample Type</b> | Sample                      | <b>IRM Calibration Status</b> | Success | <b>Data Filename</b>   | ATK-AN-SF-1.d                   |
| <b>ACQ Method</b>  | LC-COLUMN-TRAINING-METHOD.m | <b>Comment</b>                |         | <b>Acquired Time</b>   | 11-04-2023 03:47:28 (UTC+05:30) |

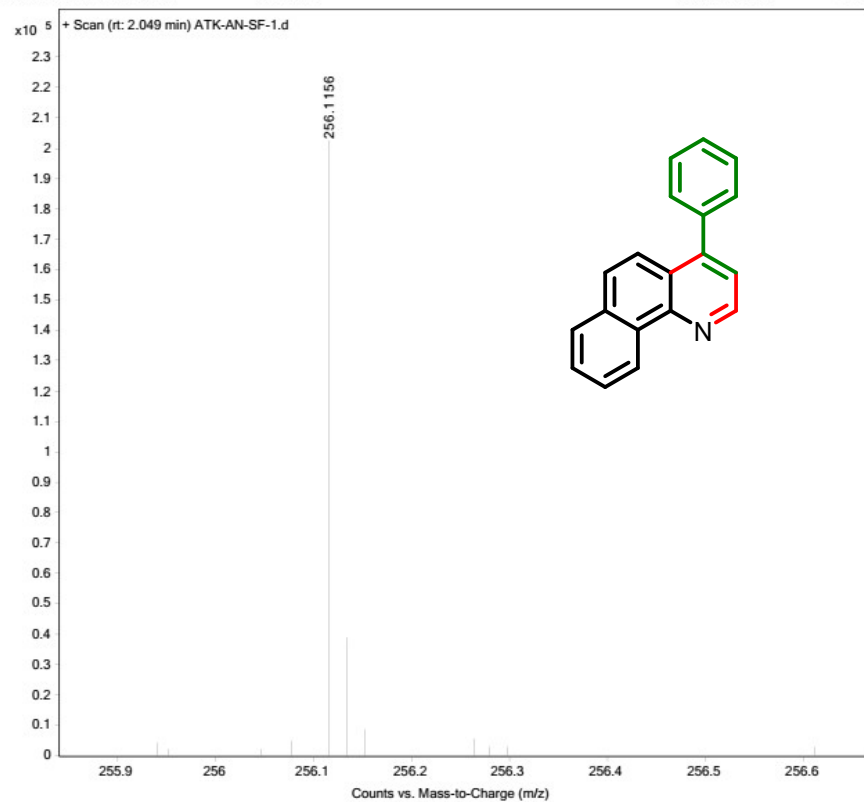

# <sup>1</sup>H NMR Spectrum of 4-Phenyl-6H-indeno[2,1-g]quinoline (3u)

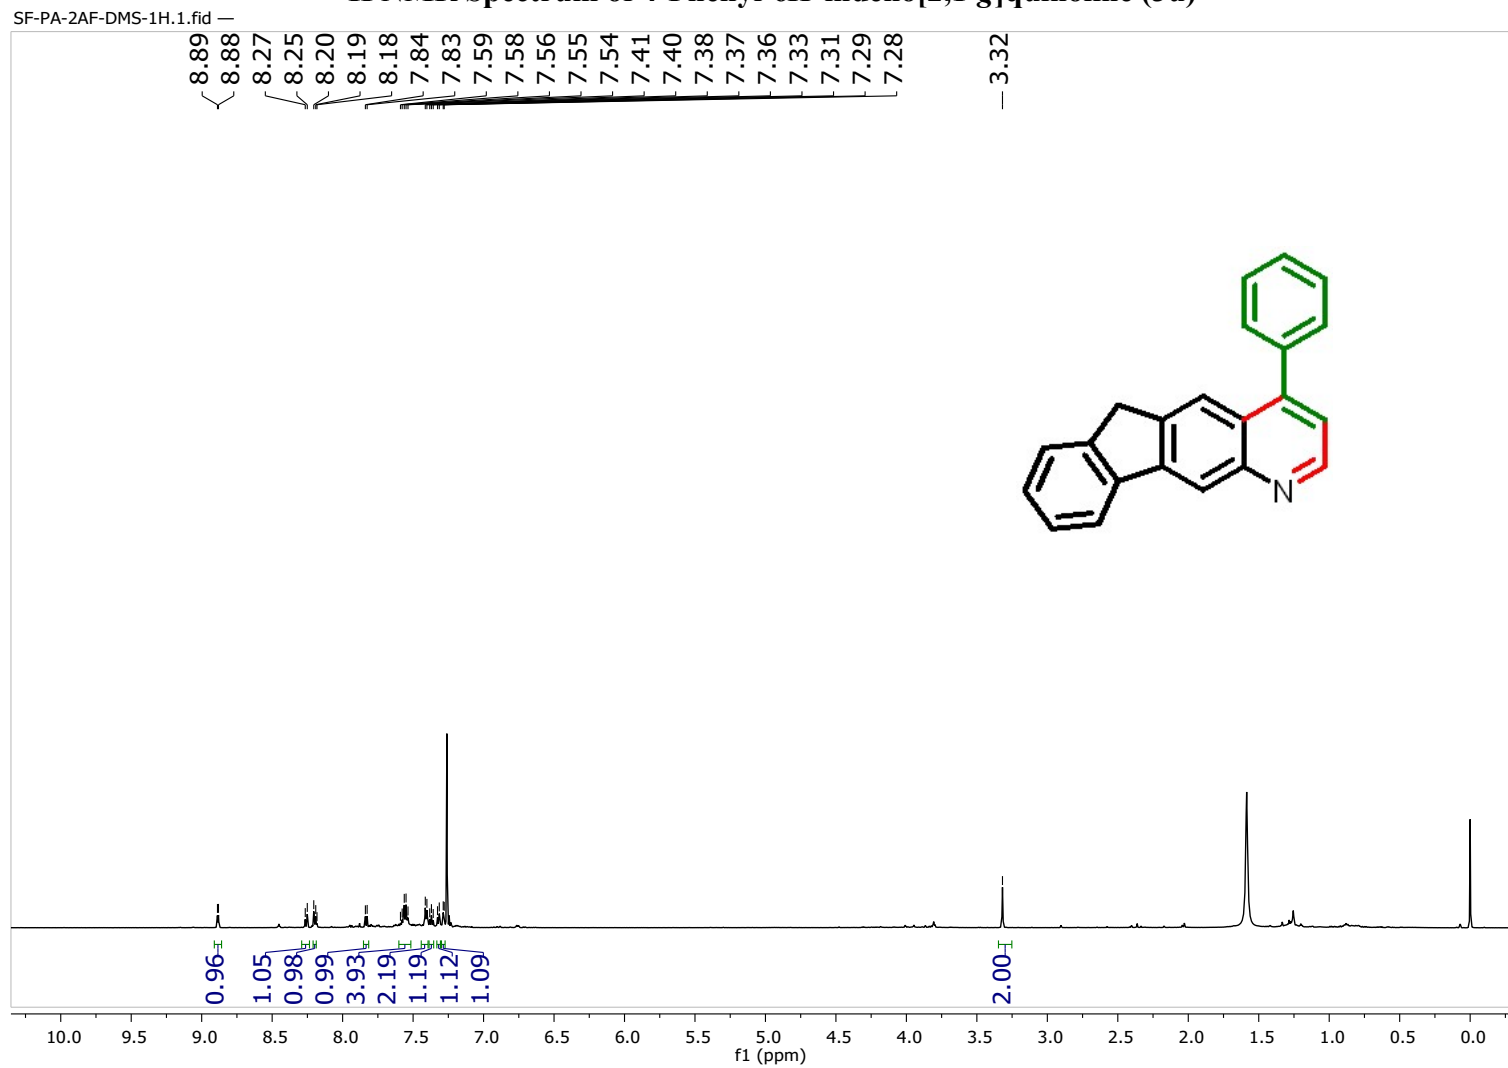

**<sup>13</sup>C NMR Spectrum of 4-Phenyl-6*H*-indeno[2,1-*g*]quinoline (3u)**

SF-PA-2AF-DMS-13C.9.fid —

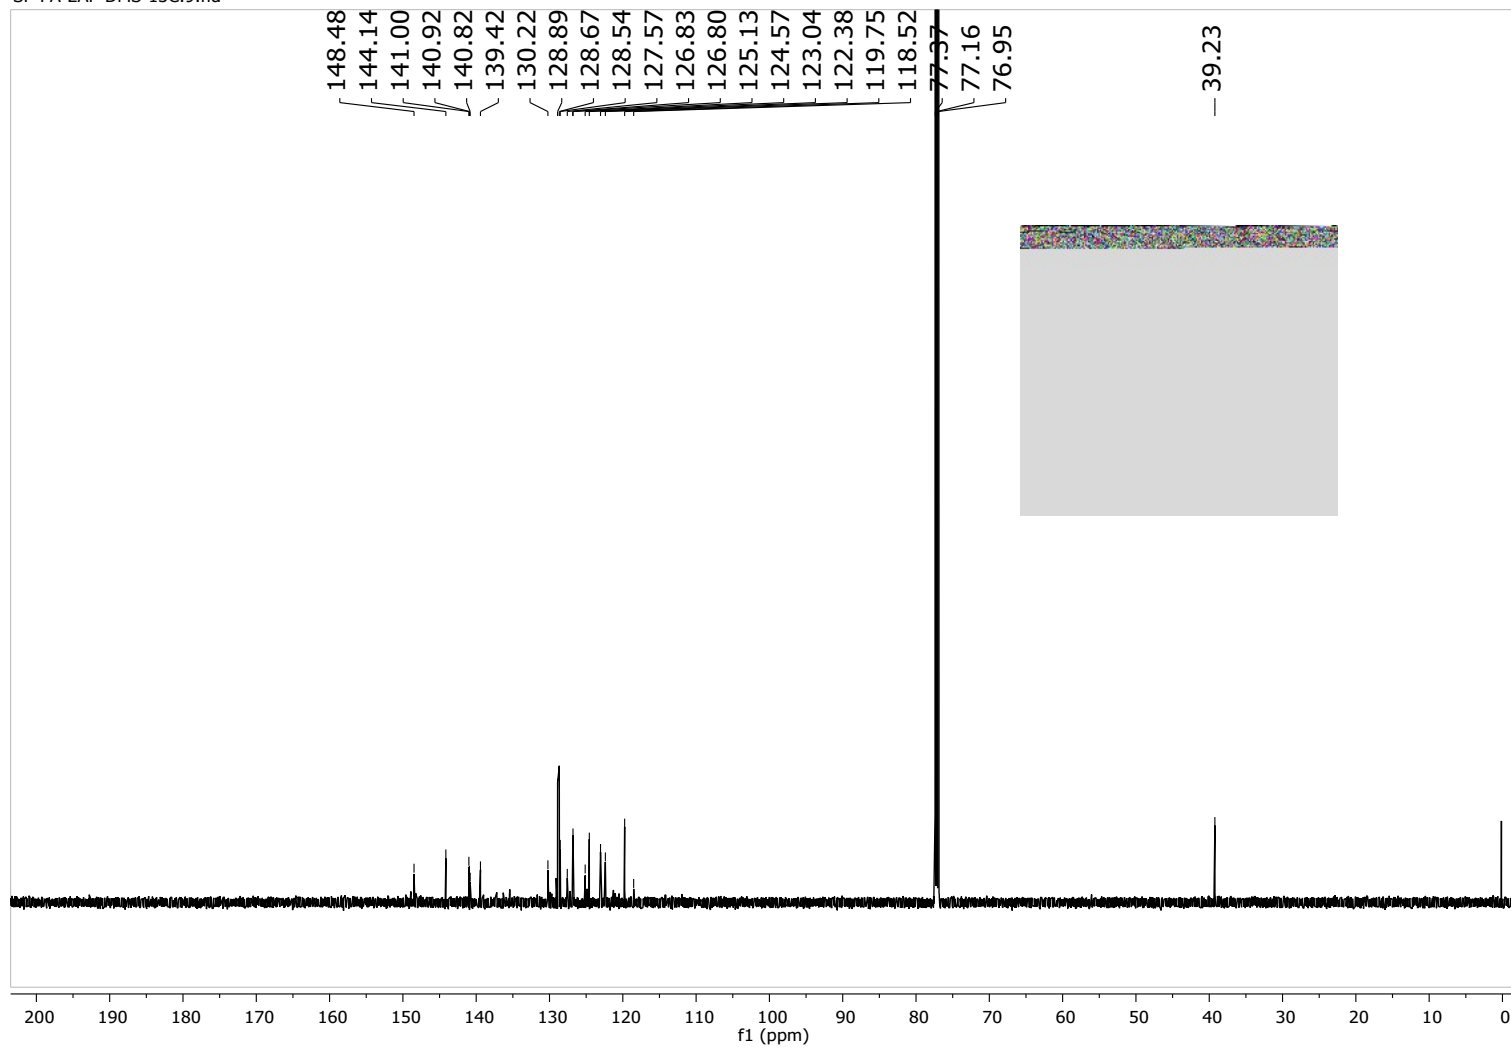

## HRMS Spectrum of 4-Phenyl-6*H*-indeno[2,1-*g*]quinoline (3u)

|             |                           |                        |         |                 |                                 |
|-------------|---------------------------|------------------------|---------|-----------------|---------------------------------|
| Sample Name | Sample14                  | Position               | P1-B3   | Instrument Name | QTOF                            |
| User Name   | SYSTEM (SYSTEM)           | Inj Vol                | 5       | InjPosition     |                                 |
| Sample Type | Sample                    | IRM Calibration Status | Success | Data Filename   | ATKESF1.d                       |
| ACQ Method  | DIRECT MASS_POSITIVE_01.m | Comment                |         | Acquired Time   | 17-04-2023 12:13:47 (UTC+05:30) |

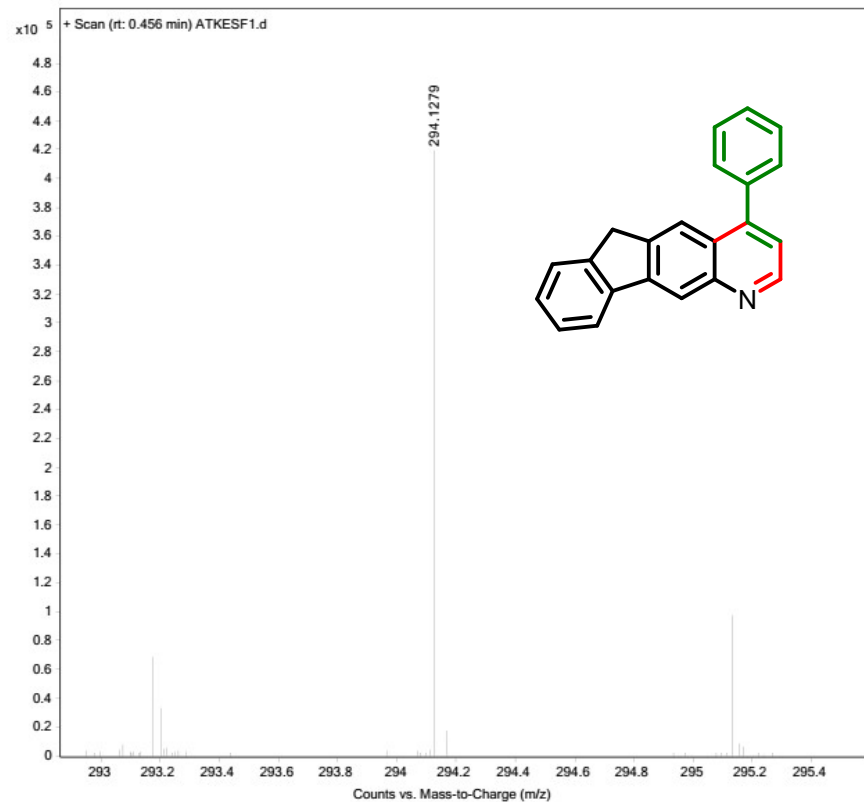

# <sup>1</sup>H NMR Spectrum of 4-Phenyl-1,10-phenanthroline(3v)

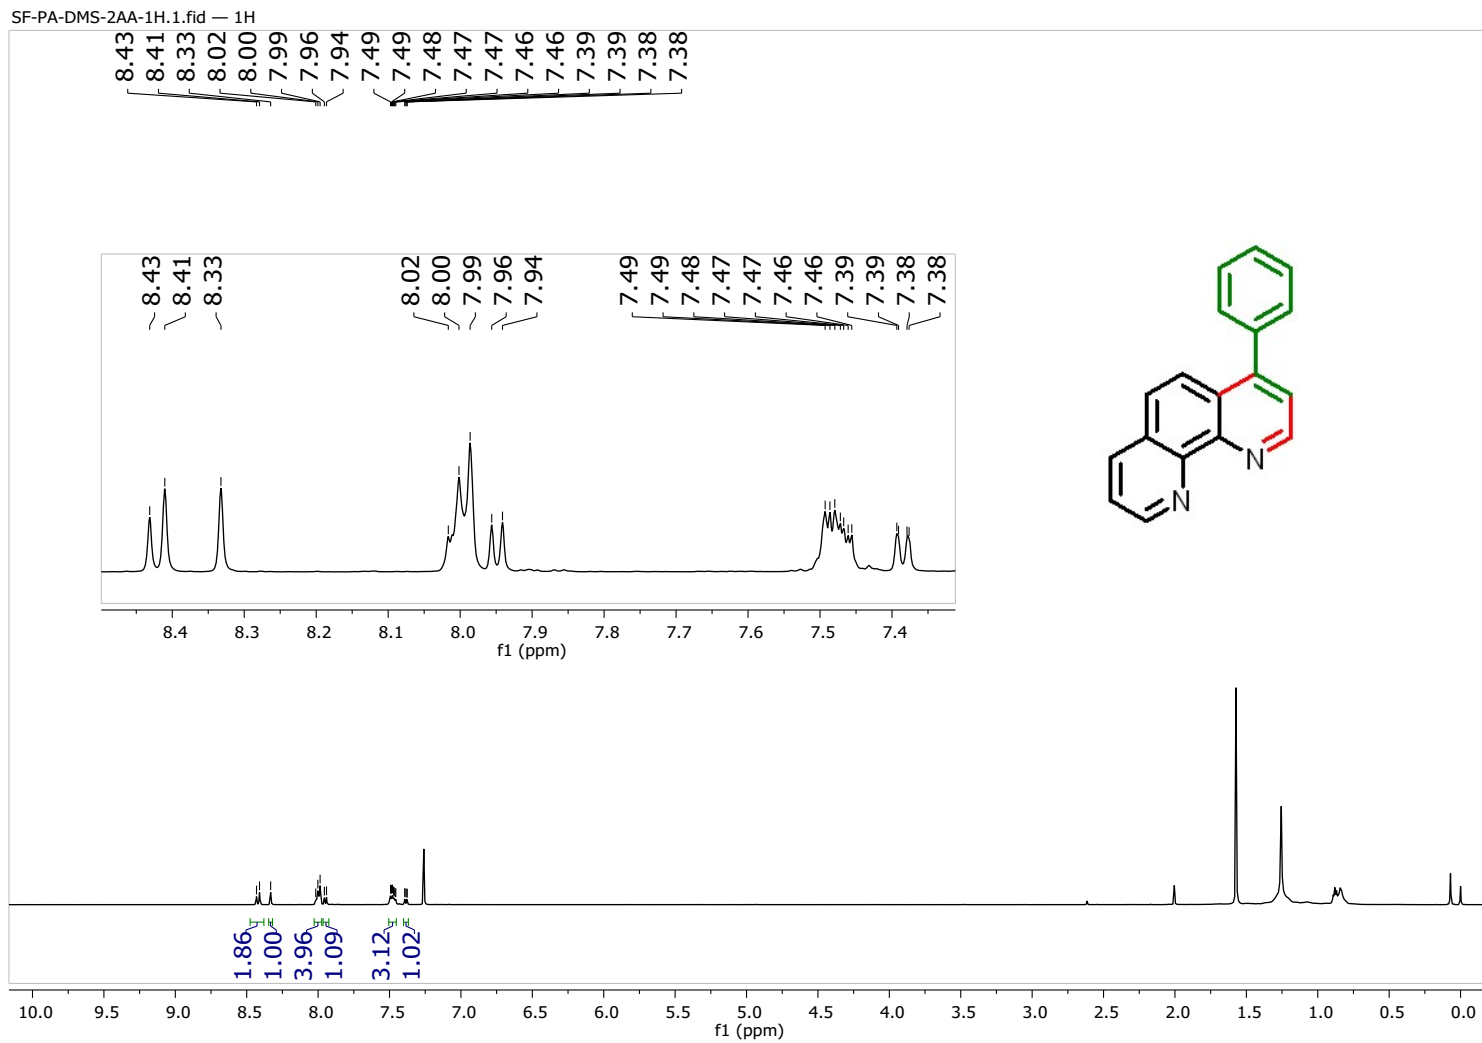

# <sup>13</sup>C NMR Spectrum of 4-Phenyl-1,10-phenanthroline(3v)

SF-PA-DMS-2AA-13C.1.fid — 13C

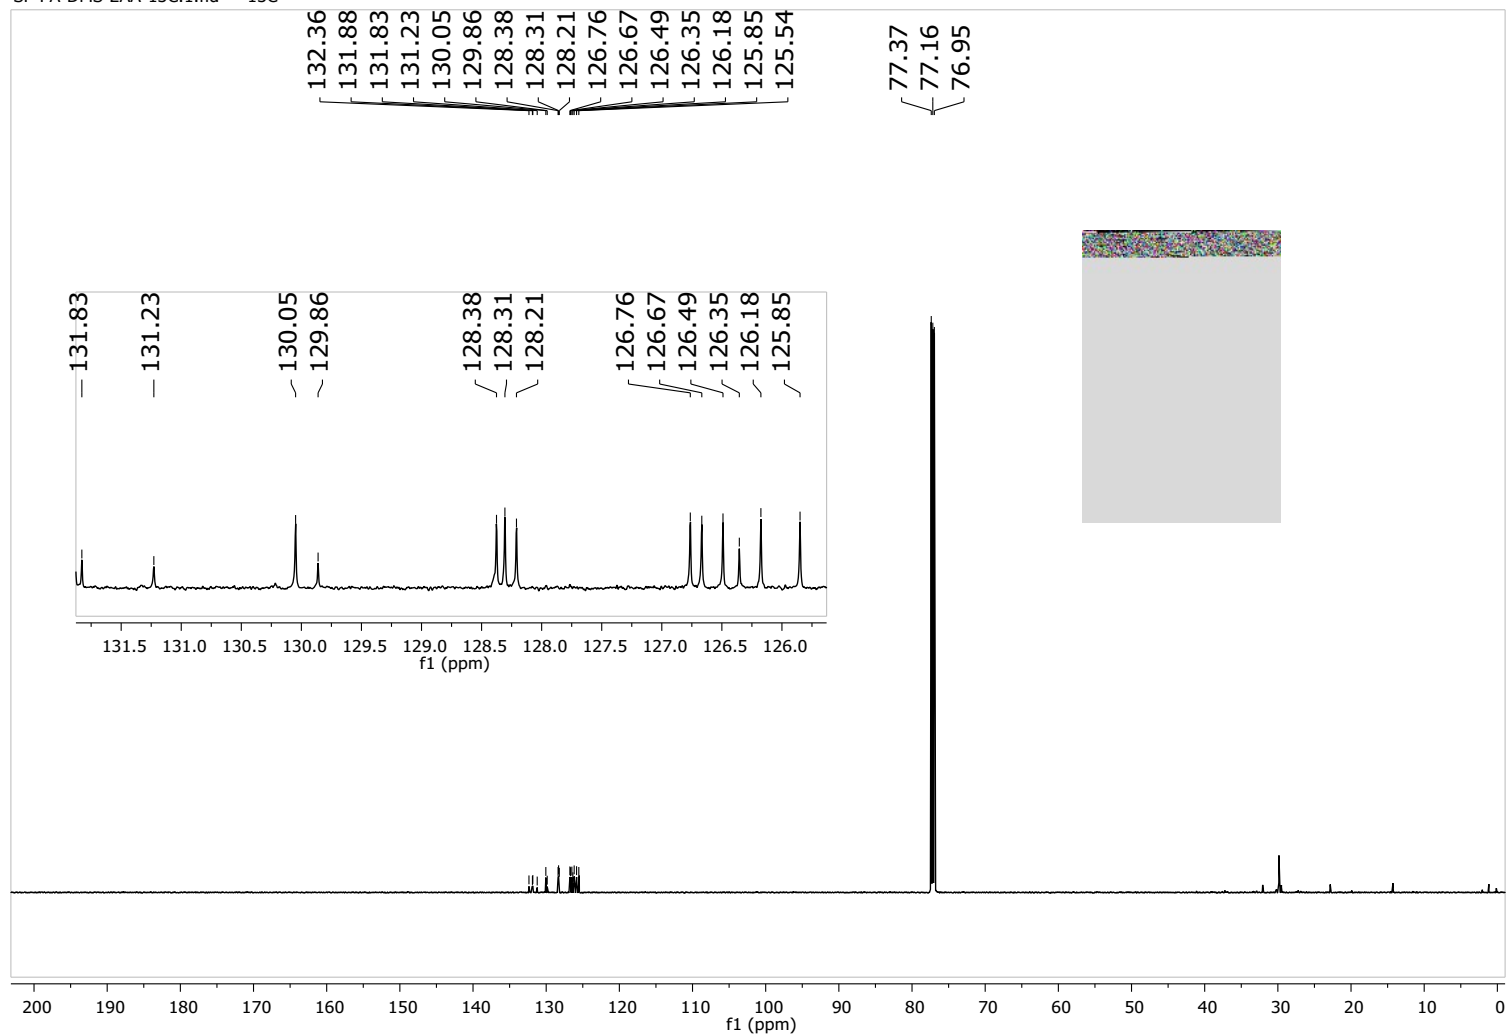

## HRMS Spectrum of 4-Phenyl-1,10-phenanthroline(3v)

|                    |                 |                               |         |                        |                                 |
|--------------------|-----------------|-------------------------------|---------|------------------------|---------------------------------|
| <b>Sample Name</b> | SF-PA-STBR-NEG  | <b>Position</b>               | P1-E3   | <b>Instrument Name</b> | Instrument 1                    |
| <b>User Name</b>   |                 | <b>Inj Vol</b>                | 10      | <b>InjPosition</b>     |                                 |
| <b>Sample Type</b> | Sample          | <b>IRM Calibration Status</b> | Success | <b>Data Filename</b>   | SF-PA-STBR-NEG_064.d            |
| <b>ACQ Method</b>  | FULL SCAN-NEG.m | <b>Comment</b>                |         | <b>Acquired Time</b>   | 27-01-2023 19:53:45 (UTC+05:30) |

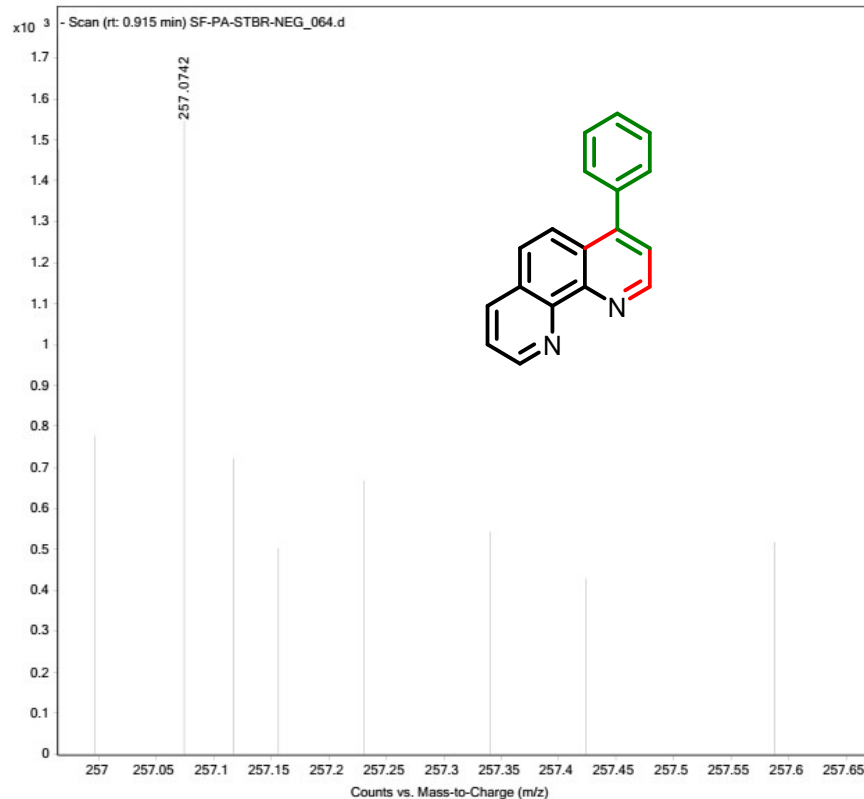

Supplement: d3ob00993a1.pdf [file d3ob00993a1.pdf]
